# Supplementary material for: Observation of face-to-face host–guest associated states prior to threading of dialkylammonium ions into the DB24C8-like openings of a molecular cage
Source: Royal Society of Chemistry journal article supplement (doi:10.1039/c2cc34669a), 2012-09-17
Supplement: c2cc34669a.pdf [file c2cc34669a.pdf]

---

# Chemical Communications

---

## Host–Guest Association Prior to Threading in the Formation of Pseudorotaxanes from Bis(dialkylammonium ion)s and a Molecular Cage

Chun-Ju Chuang, Ming-Liang Yen, Chien-Chen Lai, Yi-Hung Liu, Shie-Ming  
Peng, and Sheng-Hsien Chiu\*

### SUPPORTING INFORMATION

|                                                                                                                                                                            | <b>Page</b> |
|----------------------------------------------------------------------------------------------------------------------------------------------------------------------------|-------------|
| Experimental procedures and characterization data for new compounds.....                                                                                                   | S2–S4       |
| <sup>1</sup> H and <sup>13</sup> C NMR spectra of the threadlike salts [2–7-H <sub>2</sub> ][2PF <sub>6</sub> ].....                                                       | S5–S16      |
| <sup>1</sup> H and <sup>13</sup> C NMR spectra of compound <b>S1</b> .....                                                                                                 | S17–S18     |
| 2D HSQC NMR spectra of the threadlike salt [5-H <sub>2</sub> ][2PF <sub>6</sub> ] .....                                                                                    | S19         |
| 2D COSY and NOESY NMR spectra of the complex<br>[1⊃•(2–4)-H <sub>2</sub> ][2PF <sub>6</sub> ] and [1⊃•6-H <sub>2</sub> ][2PF <sub>6</sub> ] .....                          | S20–S31     |
| Kinetic data for the passage of the aromatic termini of the face-to-face<br>complexed [1⊃•(2–6)-H <sub>2</sub> ][2PF <sub>6</sub> ] into the Molecular Cage <b>1</b> ..... | S32–S37     |

## Experimental Section

### General synthetic procedure for the threadlike salts [2–6-H<sub>2</sub>][2PF<sub>6</sub>]

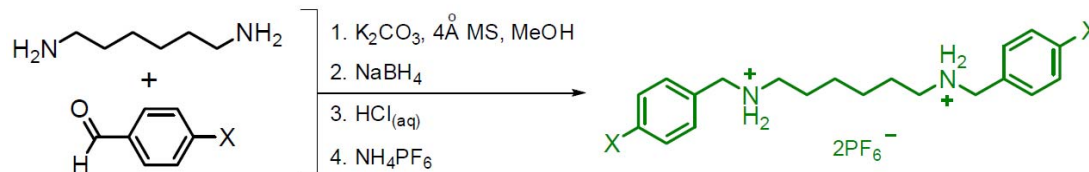

Scheme S1. Synthesis of the threadlike salts [2–6-H<sub>2</sub>][2PF<sub>6</sub>].

4-Å Molecular sieves (0.3 g mmol<sup>-1</sup> of diamine), K<sub>2</sub>CO<sub>3</sub> (2.4 equiv), and the pertinent para-substituted benzaldehyde (2.1 equiv) were added to a solution of 1,6-diaminohexane (0.1 M) in MeOH. The mixture was heated under reflux for 16 h, before being cooled to room temperature and filtered. NaBH<sub>4</sub> (5 equiv) was added to the filtrate and then the mixture was heated under reflux for 6 h. After concentration, the residue was taken up in CH<sub>2</sub>Cl<sub>2</sub> (100 mL) and washed with water (2 × 50 mL). The organic phase was dried (MgSO<sub>4</sub>) and concentrated. The residue was dissolved in MeOH (15 mL) and the solution acidified using 6 N HCl<sub>(aq)</sub>. The white precipitate was filtered, washed with CH<sub>2</sub>Cl<sub>2</sub> (10 mL), dissolved in MeOH (15 mL), and treated with saturated NH<sub>4</sub>PF<sub>6(aq)</sub> (20 mL). The organic solvent was evaporated under reduced pressure; the precipitate was filtered, washed with water (5 mL), and dried.

[2-H<sub>2</sub>][2PF<sub>6</sub>]: 22 %; mp 260 °C (dec); <sup>1</sup>H NMR (400 MHz, CD<sub>3</sub>CN, 298 K): δ = 1.31–1.37 (m, 4H), 1.59–1.67 (m, 4H), 3.00 (t, *J* = 8 Hz, 4H), 4.13 (s, 4H), 7.38 (d, *J* = 8 Hz, 4H), 7.64 (d, *J* = 8 Hz, 4H); <sup>13</sup>C NMR (100 MHz, CD<sub>3</sub>CN, 298 K): δ = 26.8, 49.2, 52.3, 125.0, 131.3, 133.6, 133.7 (one aliphatic carbon signal was missing possibly because of signals overlapping); HRMS (ESI): *m/z* calcd for [2-H<sub>2</sub>][PF<sub>6</sub>]<sup>+</sup> C<sub>20</sub>H<sub>28</sub>Br<sub>2</sub>F<sub>6</sub>N<sub>2</sub>P<sup>+</sup> 599.0261, found *m/z* 599.0295.

[3-H<sub>2</sub>][2PF<sub>6</sub>]: 80 %; mp 237–239 °C; <sup>1</sup>H NMR (400 MHz, CD<sub>3</sub>CN, 298 K): δ = 1.31–1.38 (m, 4H), 1.58–1.68 (m, 4H), 2.36 (s, 6H), 2.99 (t, *J* = 8 Hz, 4H), 4.10 (s, 4H), 7.27 (d, *J* = 8 Hz, 4H), 7.33 (d, *J* = 8 Hz, 4H); <sup>13</sup>C NMR (100 MHz, CD<sub>3</sub>CN, 298 K): δ = 21.3, 26.3, 26.4, 48.7, 52.4, 128.6, 130.7, 131.1, 141.0; HRMS (ESI): *m/z* calcd for [3-H<sub>2</sub>][PF<sub>6</sub>]<sup>+</sup> C<sub>22</sub>H<sub>34</sub>F<sub>6</sub>N<sub>2</sub>P<sup>+</sup> 471.2364, found *m/z* 471.2391.

[4-H<sub>2</sub>][2PF<sub>6</sub>]: 60 %; mp 240–241 °C; <sup>1</sup>H NMR (400 MHz, CD<sub>3</sub>CN, 298 K): δ =

1.29–1.42 (m, 4H), 1.58–1.70 (m, 4H), 2.98 (t,  $J = 7$  Hz, 4H), 3.81 (s, 6H), 4.09 (s, 4H), 6.44–6.81 (br, 4H), 6.98 (d,  $J = 9$  Hz, 4H), 7.37 (d,  $J = 9$  Hz, 4H);  $^{13}\text{C}$  NMR (100 MHz,  $\text{CD}_3\text{CN}$ , 298 K):  $\delta = 26.7, 26.7, 48.8, 52.5, 56.4, 115.6, 123.5, 132.9, 161.8$ ; HRMS (ESI):  $m/z$  calcd for  $[\mathbf{4}\text{-H}_2][\text{PF}_6]^+$   $\text{C}_{22}\text{H}_{34}\text{F}_6\text{N}_2\text{O}_2\text{P}^+$  503.2262, found  $m/z$  503.2288.

$[\mathbf{5}\text{-H}_2][2\text{PF}_6]$ : 64 %; mp 250 °C (dec);  $^1\text{H}$  NMR (400 MHz,  $\text{CD}_3\text{CN}$ , 298 K):  $\delta = 1.31\text{--}1.37$  (m, 4H), 1.58–1.67 (m, 4H), 2.96–3.05 (m, 4H), 4.15 (t,  $J = 6$  Hz, 4H), 6.55–6.86 (br, 4H), 7.22 (dd,  $J = 9, 9$  Hz, 4H), 7.50 (dd,  $J = 6, 9$  Hz, 4H);  $^{13}\text{C}$  NMR (100 MHz,  $\text{CD}_3\text{CN}$ , 298 K):  $\delta = 26.8, 26.8, 49.2, 52.3, 117.4$  ( $^3J_{\text{CF}} = 22$  Hz), 128.2 ( $^4J_{\text{CF}} = 3$  Hz), 134.0 ( $^2J_{\text{CF}} = 9$  Hz), 164.9 ( $^1J_{\text{CF}} = 246$  Hz); HRMS (ESI):  $m/z$  calcd for  $[\mathbf{5}\text{-H}_2][\text{PF}_6]^+$   $\text{C}_{20}\text{H}_{28}\text{F}_8\text{N}_2\text{P}^+$  479.1862, found  $m/z$  479.1844.

$[\mathbf{6}\text{-H}_2][2\text{PF}_6]$ : 6 %; mp 257 °C (dec);  $^1\text{H}$  NMR (400 MHz,  $\text{CD}_3\text{CN}$ , 298 K):  $\delta = 1.28\text{--}1.43$  (m, 4H), 1.57–1.72 (m, 4H), 3.00 (t,  $J = 8$  Hz, 4H), 4.15 (s, 4H), 7.40–7.57 (m, 10H);  $^{13}\text{C}$  NMR (100 MHz,  $\text{CD}_3\text{CN}$ , 298 K):  $\delta = 26.8, 26.8, 49.2, 53.1, 130.6, 131.2, 131.5, 132.1$ ; HRMS (ESI):  $m/z$  calcd for  $[\mathbf{6}\text{-H}_2][\text{PF}_6]^+$   $\text{C}_{20}\text{H}_{30}\text{F}_6\text{N}_2\text{P}^+$  443.2045, found  $m/z$  443.2050.

#### *N*-(4-*tert*-Butylbenzyl)-1,6-diaminohexane (**S1**)

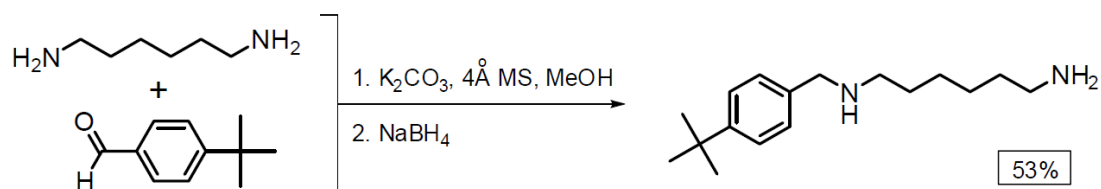

Scheme S2. Synthesis of *N*-(4-*tert*-butylbenzyl)-1,6-diaminohexane

4-Å Molecular sieves (0.3 g),  $\text{K}_2\text{CO}_3$  (0.3 g), and 4-*tert*-butylbenzaldehyde (0.14 g, 0.9 mmol) were added to a solution of 1,6-diaminohexane (0.50 g, 4.3 mmol) in MeOH (50 mL) and the mixture was heated under reflux for 16 h, before being cooled to room temperature and filtered.  $\text{NaBH}_4$  (43 mg, 1.12 mmol) was added to the filtrate and then the mixture was heated under reflux for 6 h. After concentration, the residue was partitioned between  $\text{CH}_2\text{Cl}_2$  (30 mL) and water (100 mL) and then the aqueous layer was extracted with  $\text{CH}_2\text{Cl}_2$  (2 × 30 mL). The combined organic phases were dried ( $\text{MgSO}_4$ ) and concentrated. The residue was purified

chromatographically (SiO<sub>2</sub>; MeOH/CH<sub>2</sub>Cl<sub>2</sub>, 5:95 to 10:90) to afford a yellow liquid (0.12 g, 53%); <sup>1</sup>H NMR (400 MHz, CDCl<sub>3</sub>, 298 K): δ 1.09–1.67 (m, 17H), 2.62 (t, *J* = 7 Hz, 2H), 2.66 (t, *J* = 7 Hz, 2H), 3.73 (s, 2H), 7.22 (d, *J* = 8 Hz, 2H), 7.32 (d, *J* = 8 Hz, 2H); <sup>13</sup>C NMR (100 MHz, CDCl<sub>3</sub>, 298 K): δ 26.8, 27.2, 30.0, 31.4, 33.7, 34.4, 42.1, 49.5, 53.7, 125.3, 127.8, 137.4, 149.8; HRMS (ESI): calcd for [S1 + H]<sup>+</sup> C<sub>17</sub>H<sub>31</sub>N<sub>2</sub><sup>+</sup> *m/z* 263.2487, found *m/z* 263.2466.

#### The synthesis of threadlike salt [7-H<sub>2</sub>][2PF<sub>6</sub>]

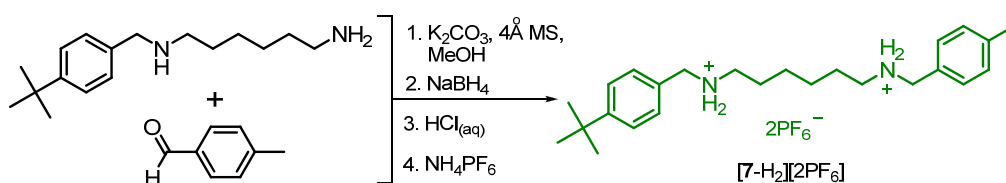

Scheme S4. Synthesis of [7-H<sub>2</sub>][2PF<sub>6</sub>]

4-Å Molecular sieves (0.21 g), K<sub>2</sub>CO<sub>3</sub> (0.21 g), and 4-methylbenzaldehyde (0.09 g, 0.8 mmol) were added to a solution of S1 (0.18 g, 0.7 mmol) in MeOH (4 mL) and the mixture was heated under reflux for 16 h, before being cooled to room temperature and filtered. NaBH<sub>4</sub> (0.03 g, 0.8 mmol) was added to the filtrate and then the mixture was heated under reflux for 6 h. After concentration, the residue was taken up in CH<sub>2</sub>Cl<sub>2</sub> (100 mL) and washed with water (2 × 50 mL). The organic phase was dried (MgSO<sub>4</sub>) and concentrated. The residue was dissolved in MeOH (15 mL) and the solution acidified using 6N HCl<sub>(aq)</sub>. The white precipitate was filtered, washed with CH<sub>2</sub>Cl<sub>2</sub> (10 mL), dissolved in MeOH (15 mL), and treated with saturated NH<sub>4</sub>PF<sub>6(aq)</sub> (20 mL). The organic solvent was evaporated under reduced pressure; the precipitate was filtered, washed with water (5 mL), and dried to afford thread [7-H<sub>2</sub>][2PF<sub>6</sub>] as a white solid (0.32 g, 70 %). mp 241 °C (dec); <sup>1</sup>H NMR (400 MHz, CD<sub>3</sub>CN, 298 K): δ = 1.29–1.42 (m, 13H), 1.57–1.72 (m, 4H), 2.37 (s, 3H), 2.93–3.11 (m, 4H), 4.12 (s, 2H), 4.13 (s, 2H), 6.48–6.87 (br, 4H), 7.28 (d, *J* = 8 Hz, 2H), 7.35 (d, *J* = 8 Hz, 2H), 7.39 (d, *J* = 8 Hz, 2H), 7.52 (d, *J* = 8 Hz, 2H); <sup>13</sup>C NMR (100 MHz, CD<sub>3</sub>CN, 298 K): δ = 21.7, 26.7, 26.8, 31.9, 35.9, 49.1, 49.2, 52.7, 52.8, 127.5, 129.0, 129.0, 131.2, 131.3, 131.5, 141.5, 154.4 (two aliphatic signals are missing possibly because of signals overlapping); HRMS (ESI): *m/z* calcd for [7-H<sub>2</sub>][PF<sub>6</sub>]<sup>+</sup> C<sub>25</sub>H<sub>40</sub>F<sub>6</sub>N<sub>2</sub>P<sup>+</sup> 513.2833, found *m/z* 513.2869.

7.655  
7.634  
7.395  
7.374

4.130

3.022  
3.002  
2.983

1.952  
1.946  
1.940  
1.934  
1.928  
1.627  
1.358  
1.349  
1.339  
1.330  
1.321

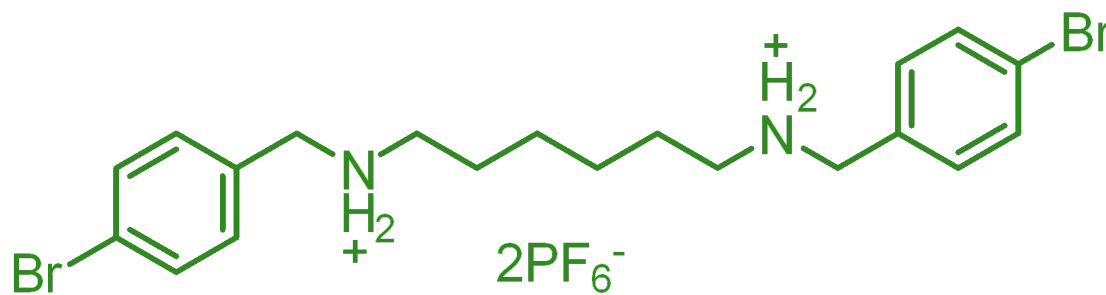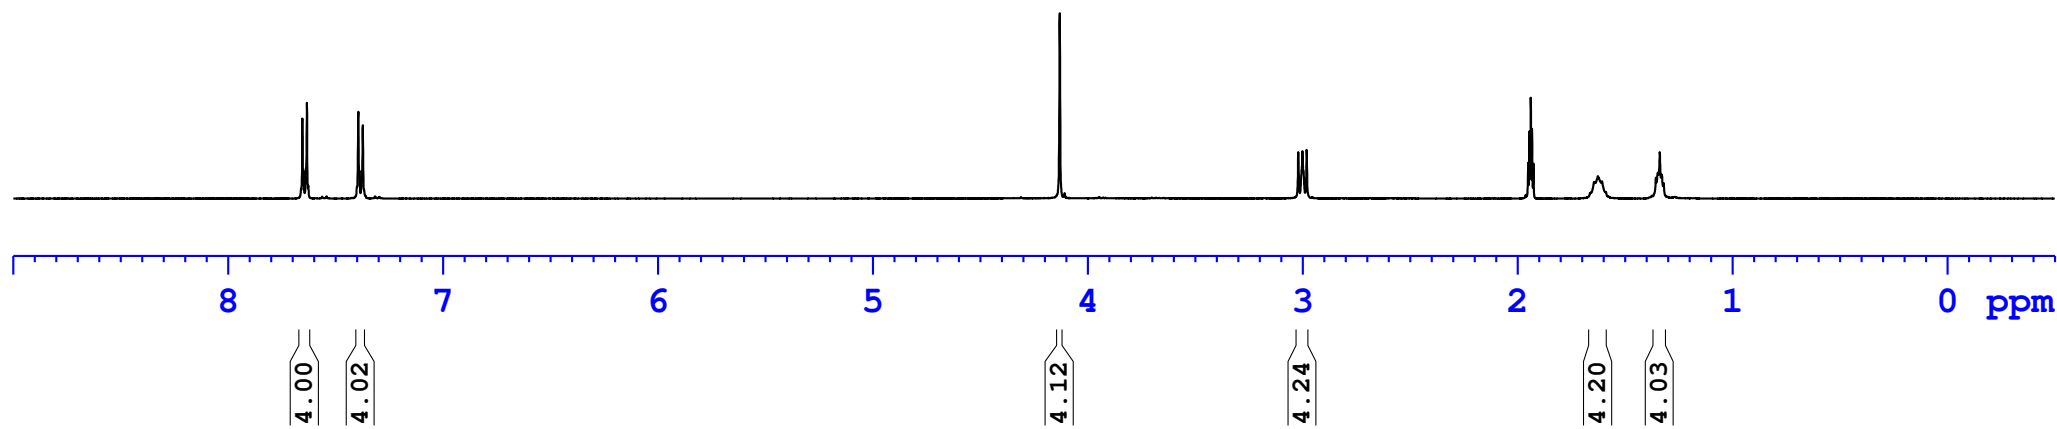

diPBB-CH<sub>3</sub>CN-<sup>13</sup>C

133.657  
133.614  
131.284  
125.001  
118.797

52.286  
49.244

26.754

2.410  
2.203  
1.997  
1.790  
1.583  
1.377  
1.170

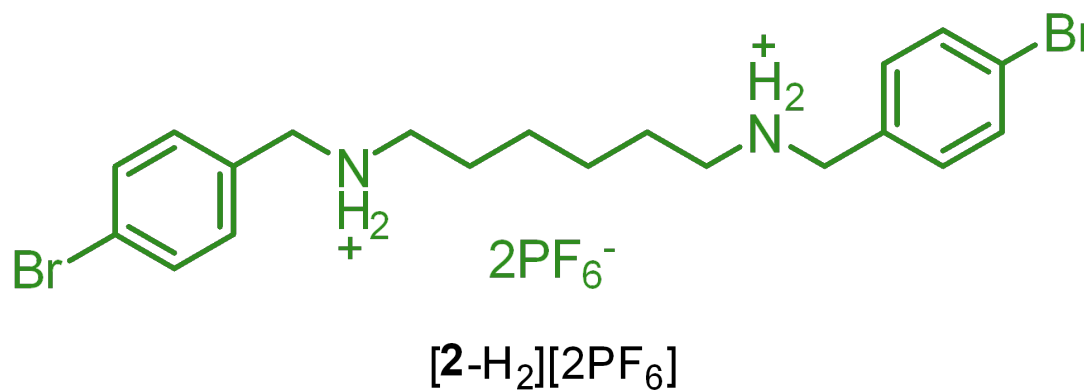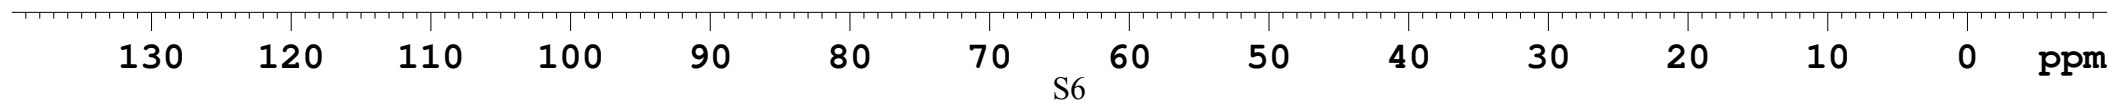

7.336  
7.315  
7.277  
7.258

4.102

3.006  
2.987  
2.967  
2.363  
1.952  
1.946  
1.940  
1.934  
1.928  
1.644  
1.637  
1.625  
1.605  
1.587  
1.355  
1.346  
1.337  
1.328  
1.319

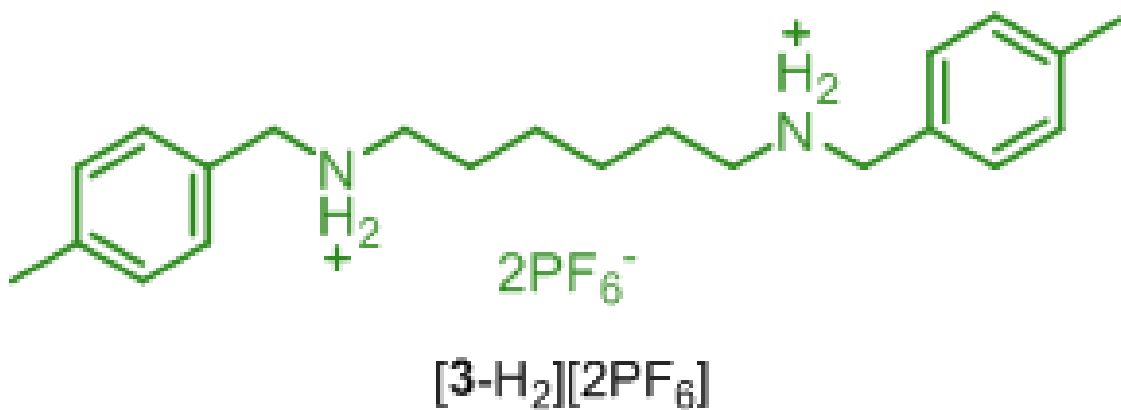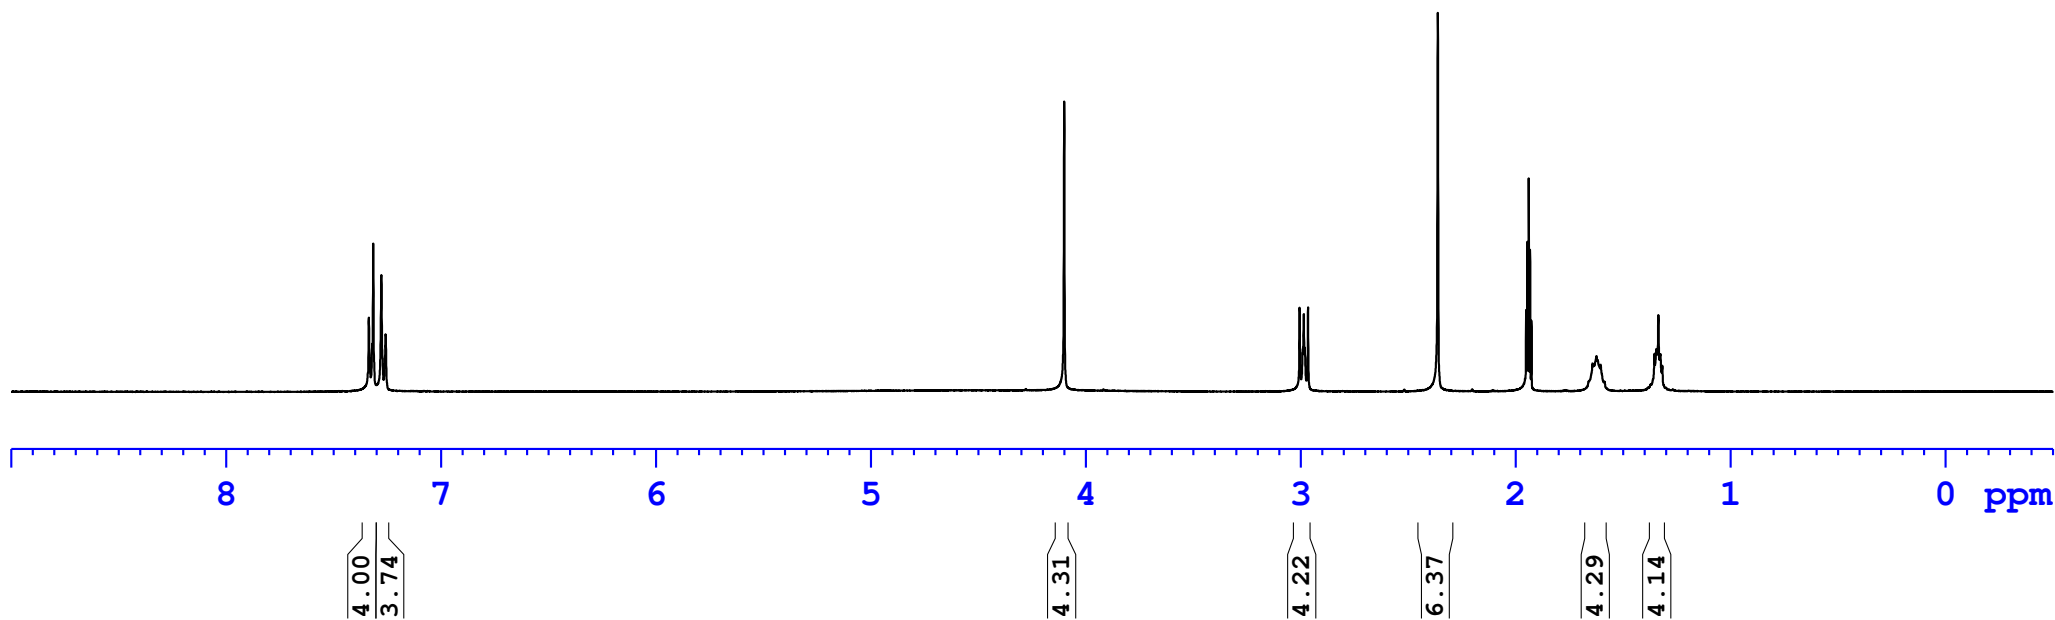

29-diPCB-1.94-

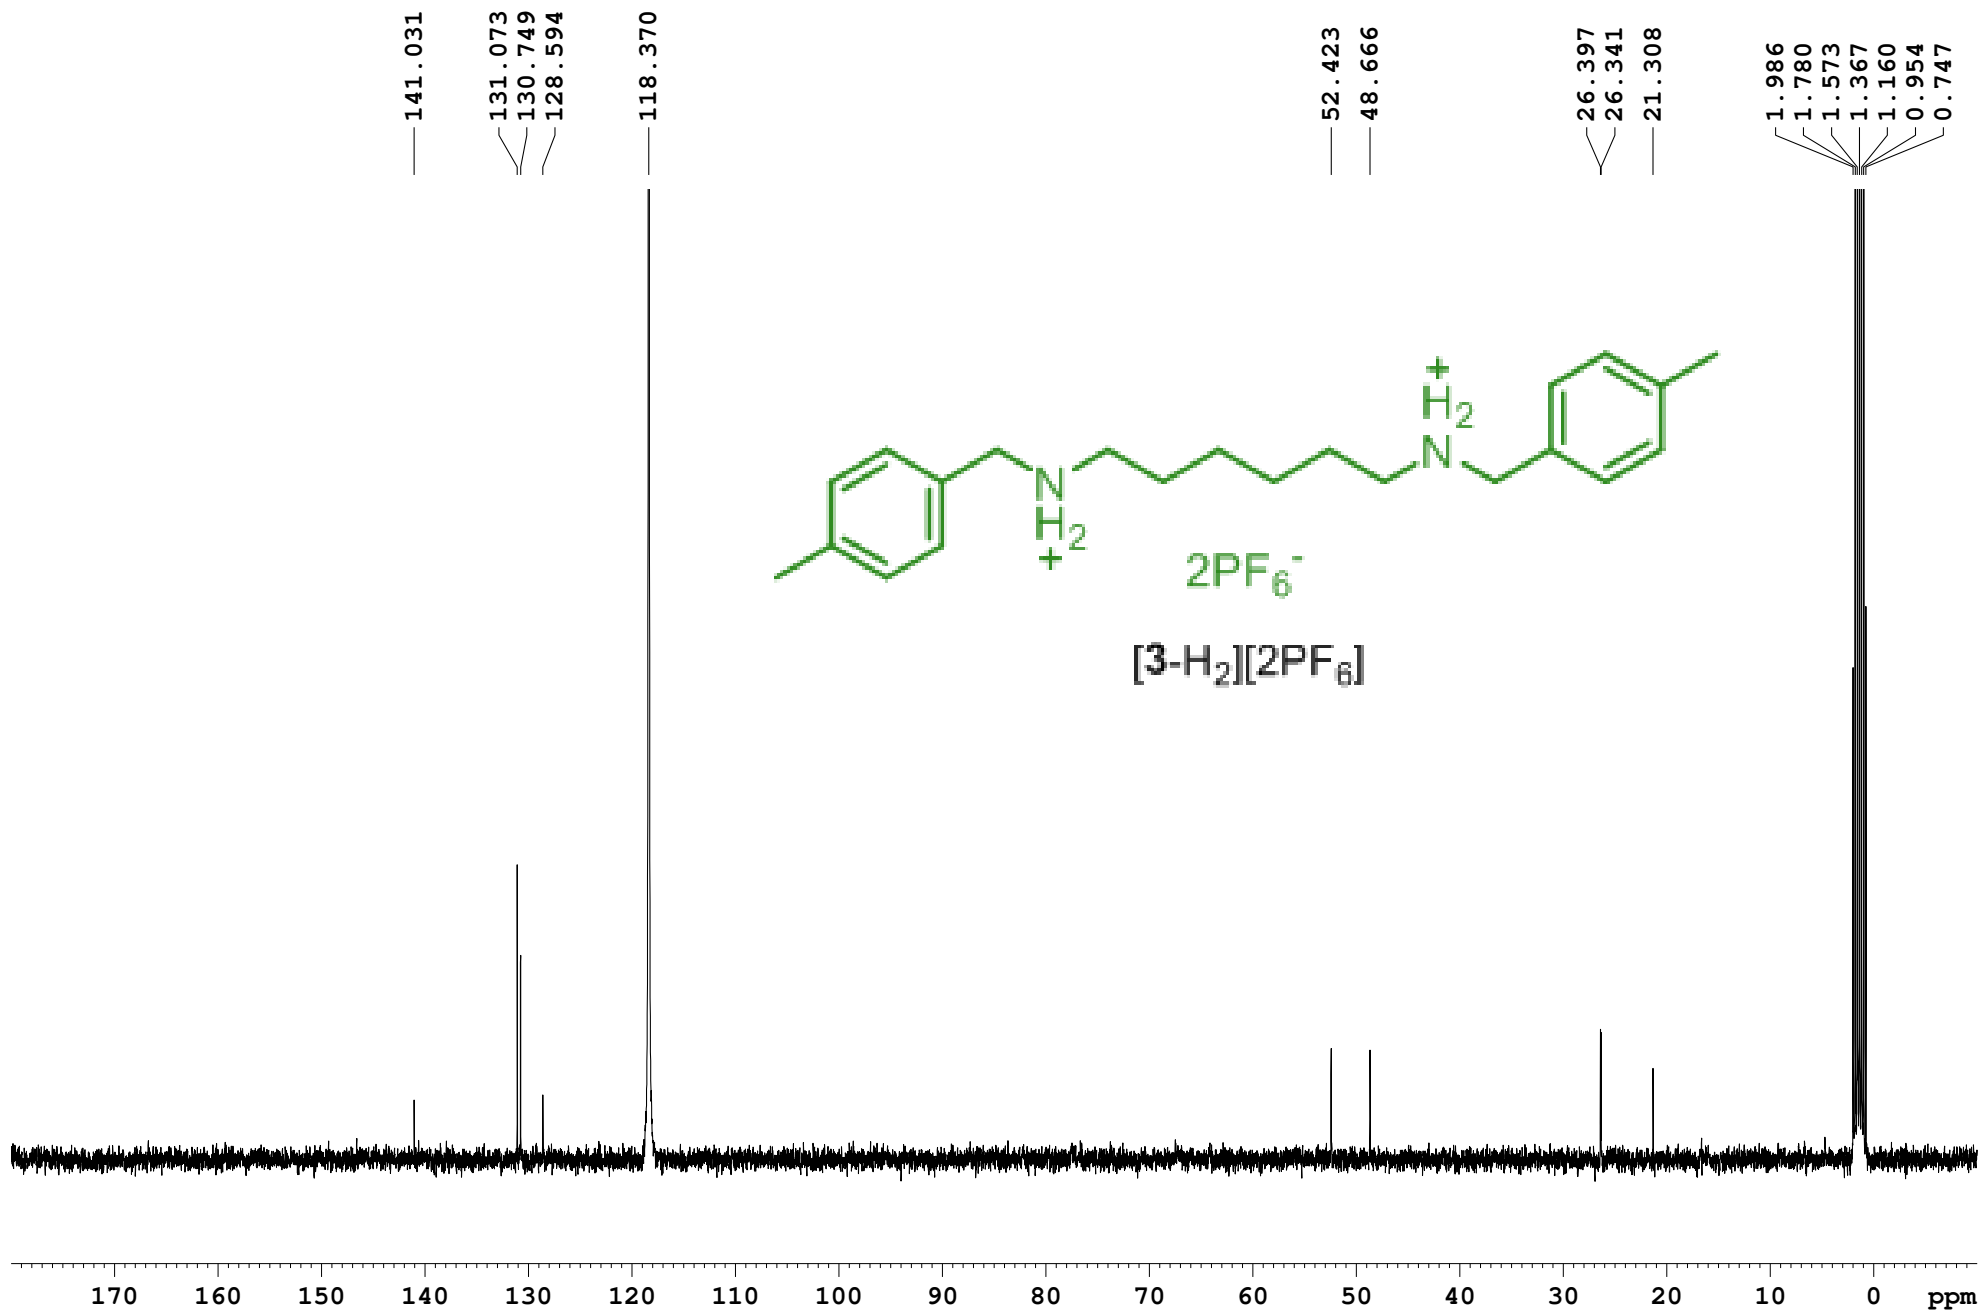



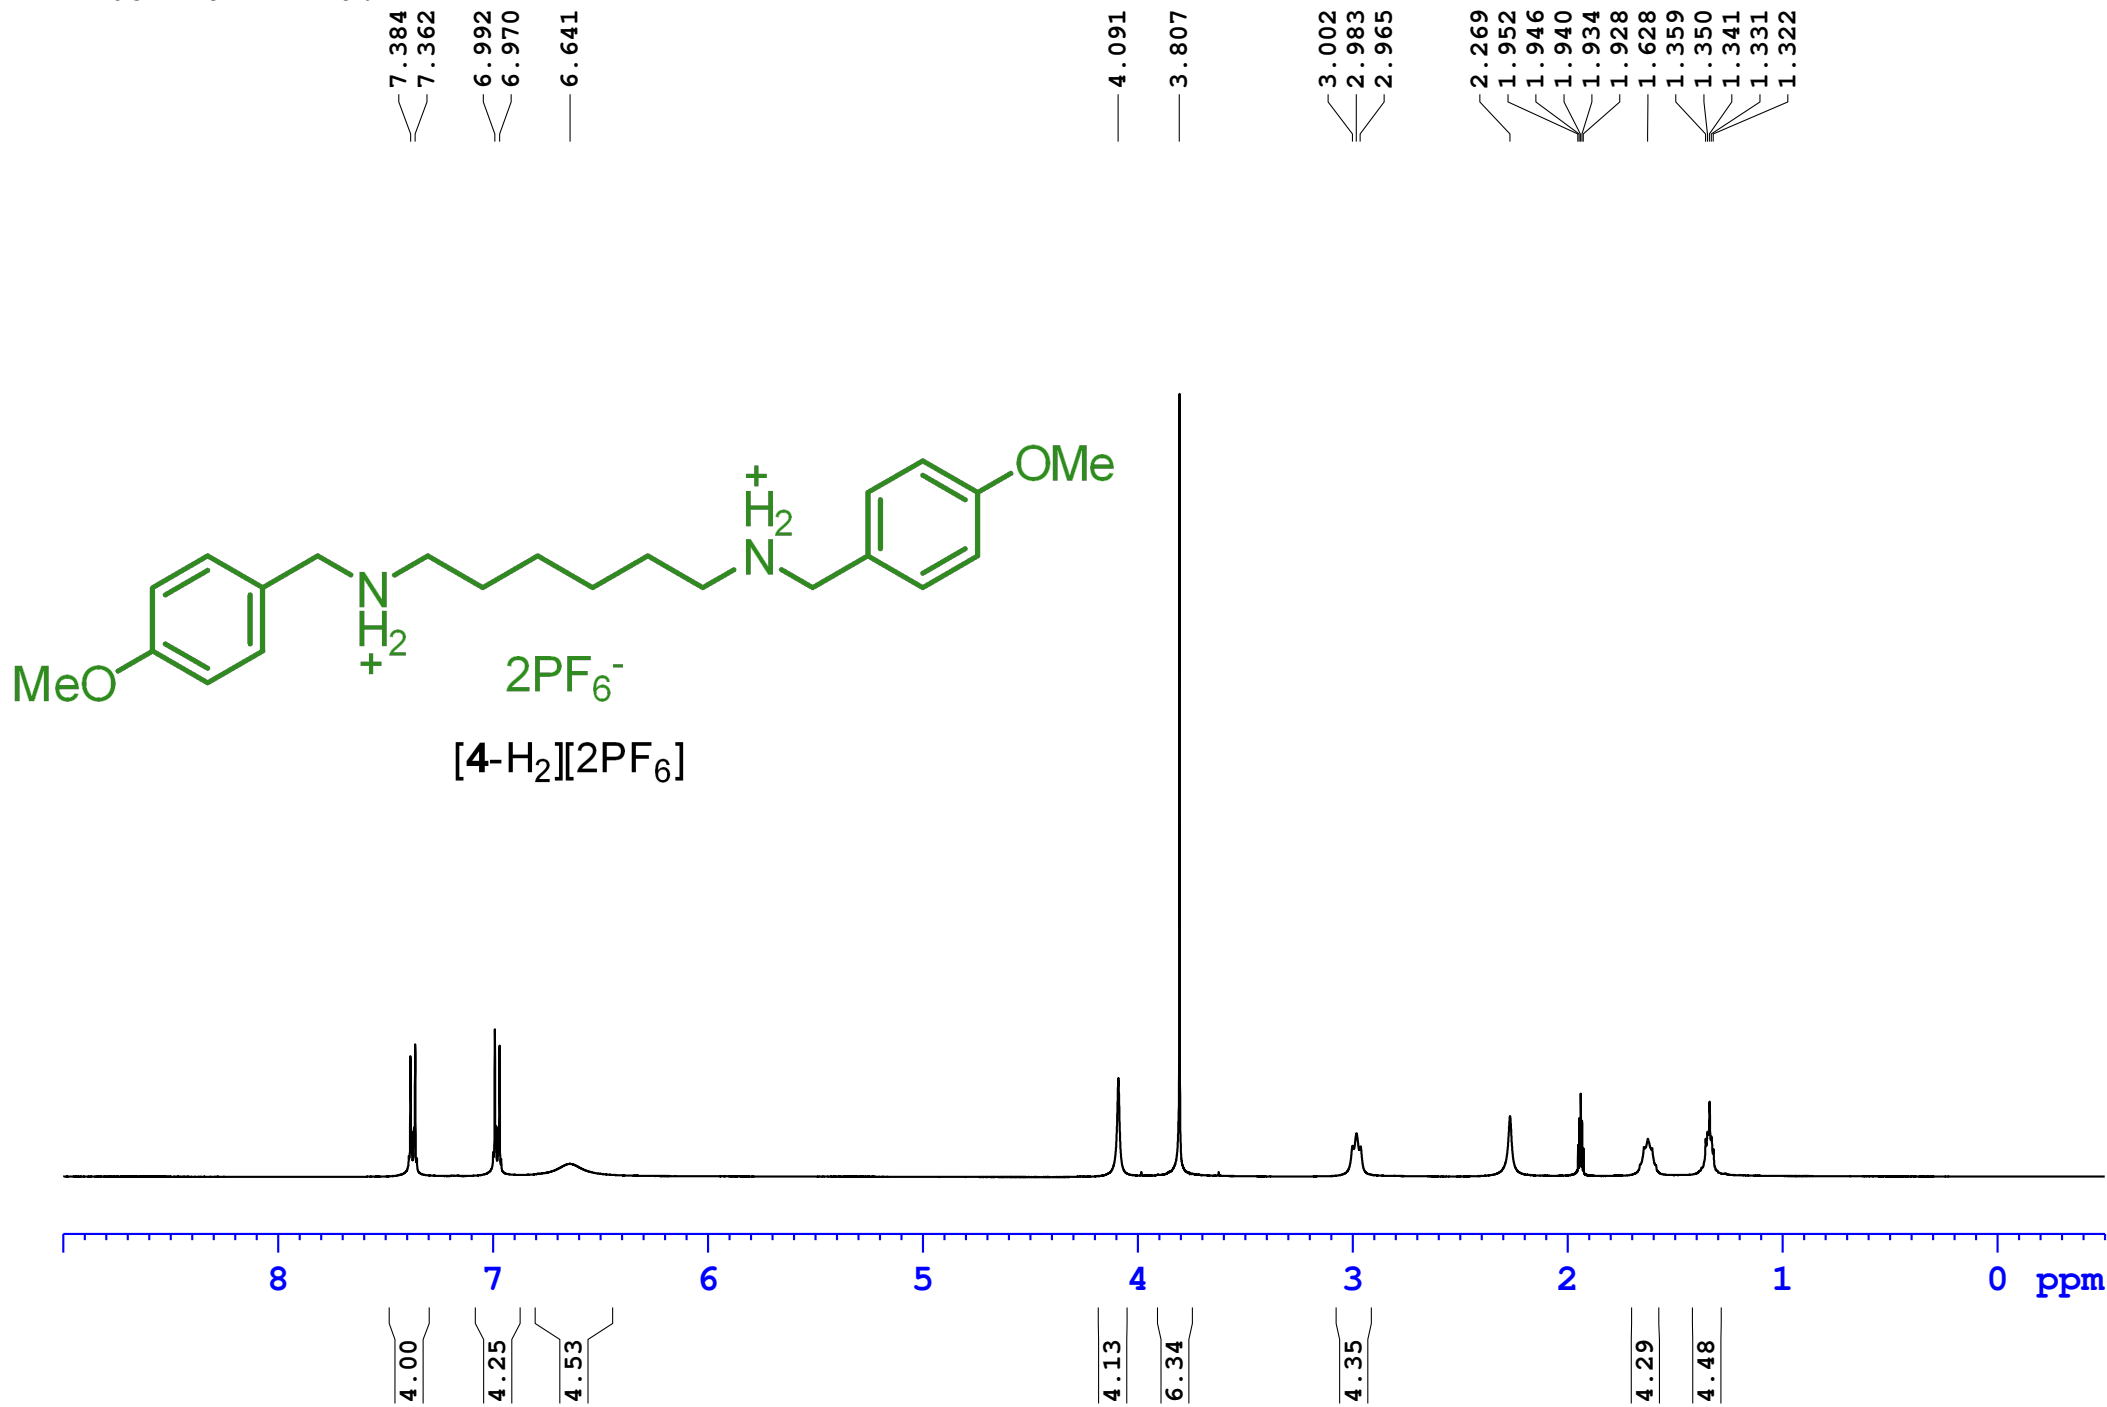

21-diPMB-1.94

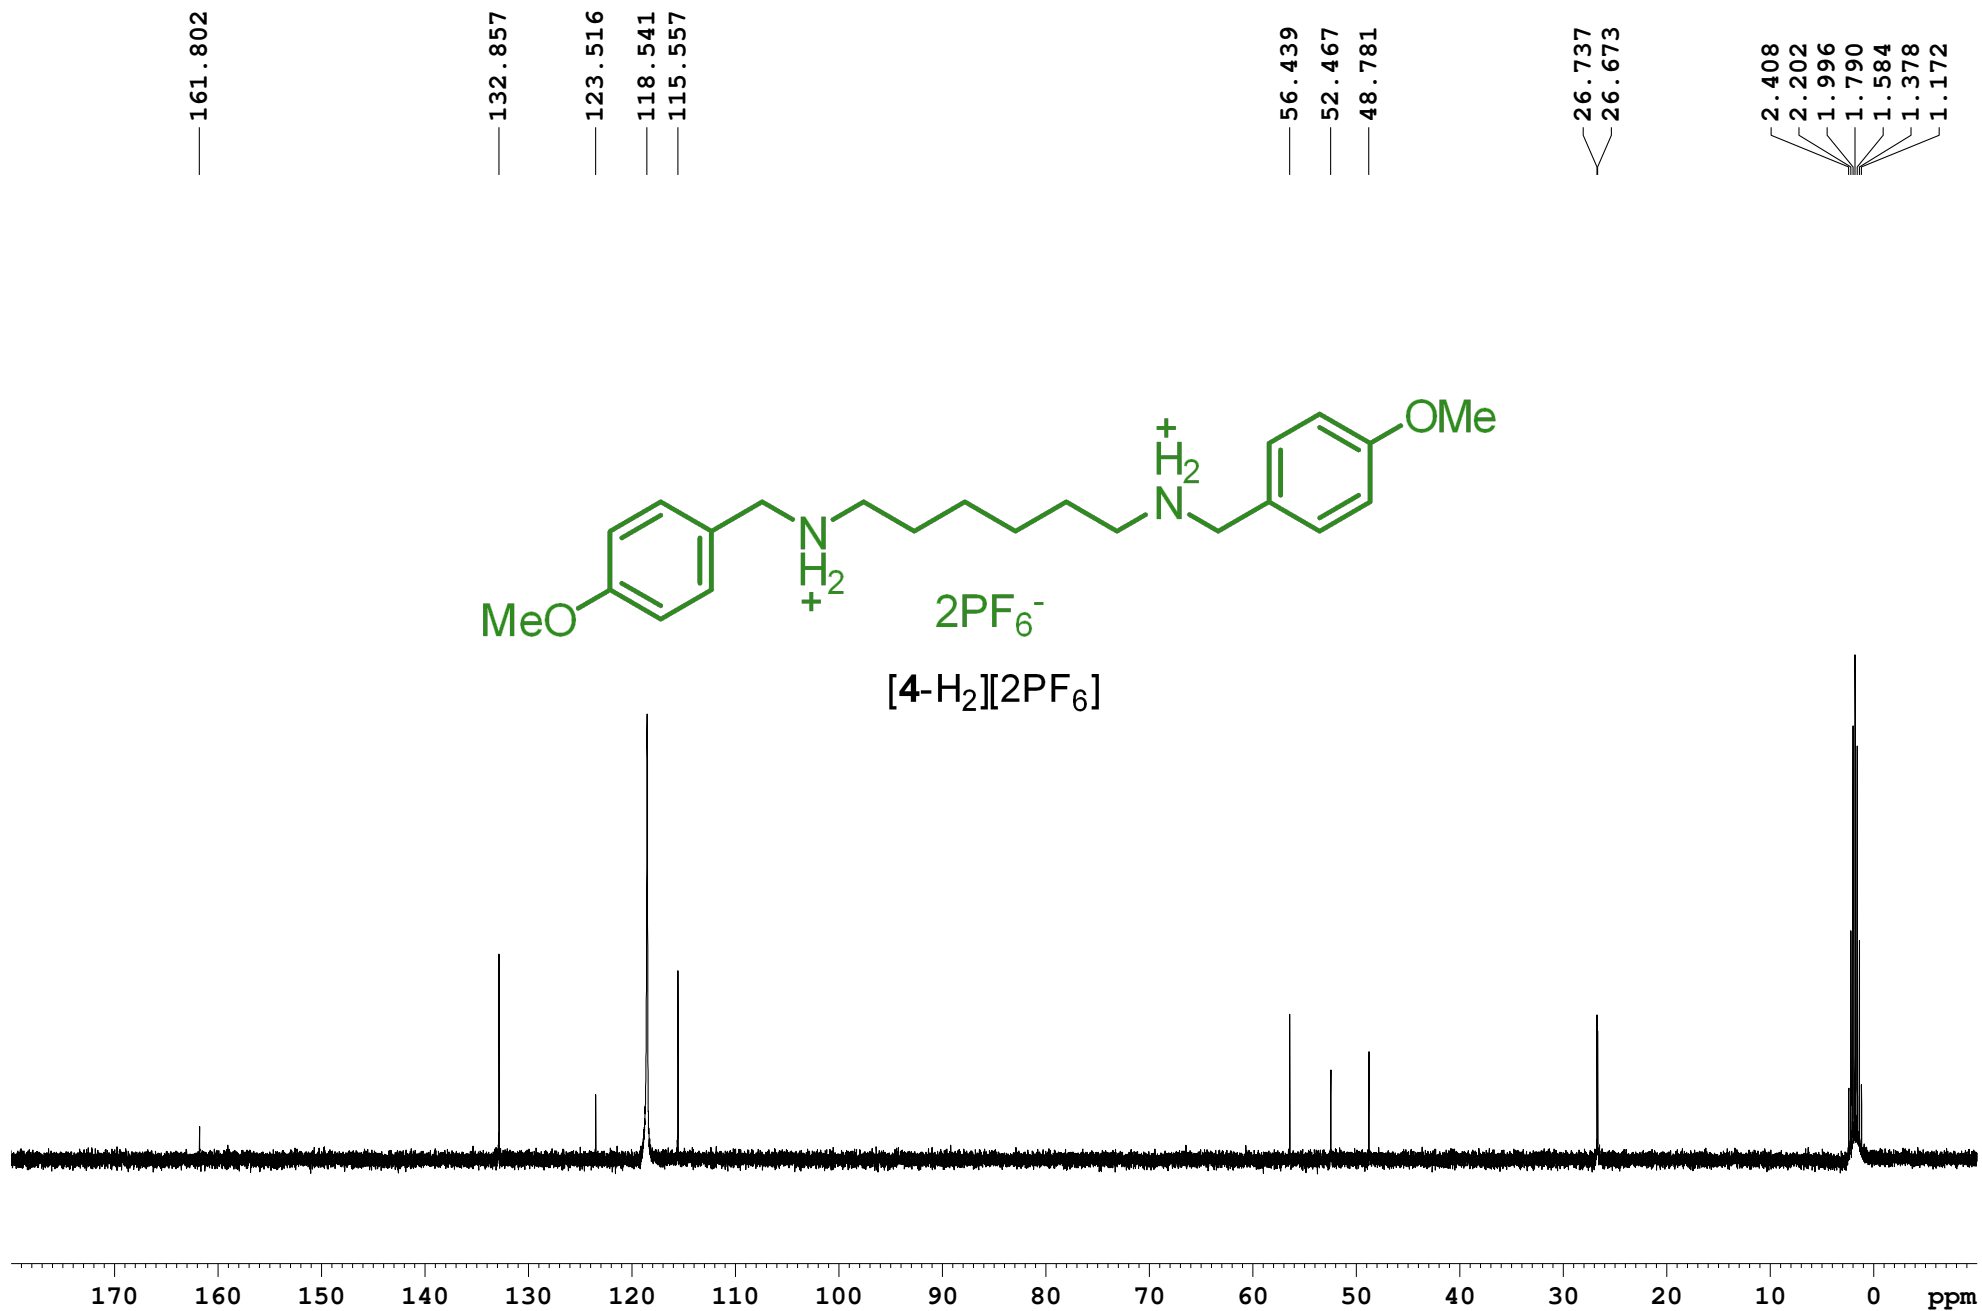

7.515  
7.501  
7.493  
7.479  
7.238  
7.215  
7.194  
— 6.698

4.165  
4.149  
4.133

3.035  
3.015  
3.007  
3.001  
2.996  
2.983  
2.963  
2.177  
1.952  
1.946  
1.940  
1.934  
1.928  
1.646  
1.640  
1.628  
1.608  
1.359  
1.350  
1.341  
1.331  
1.322

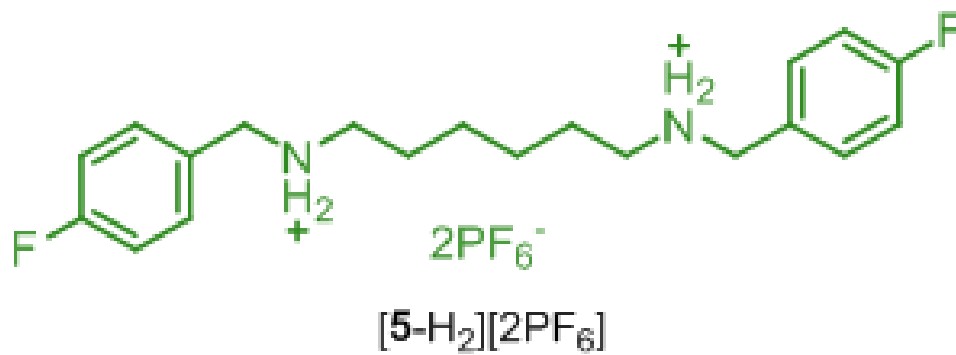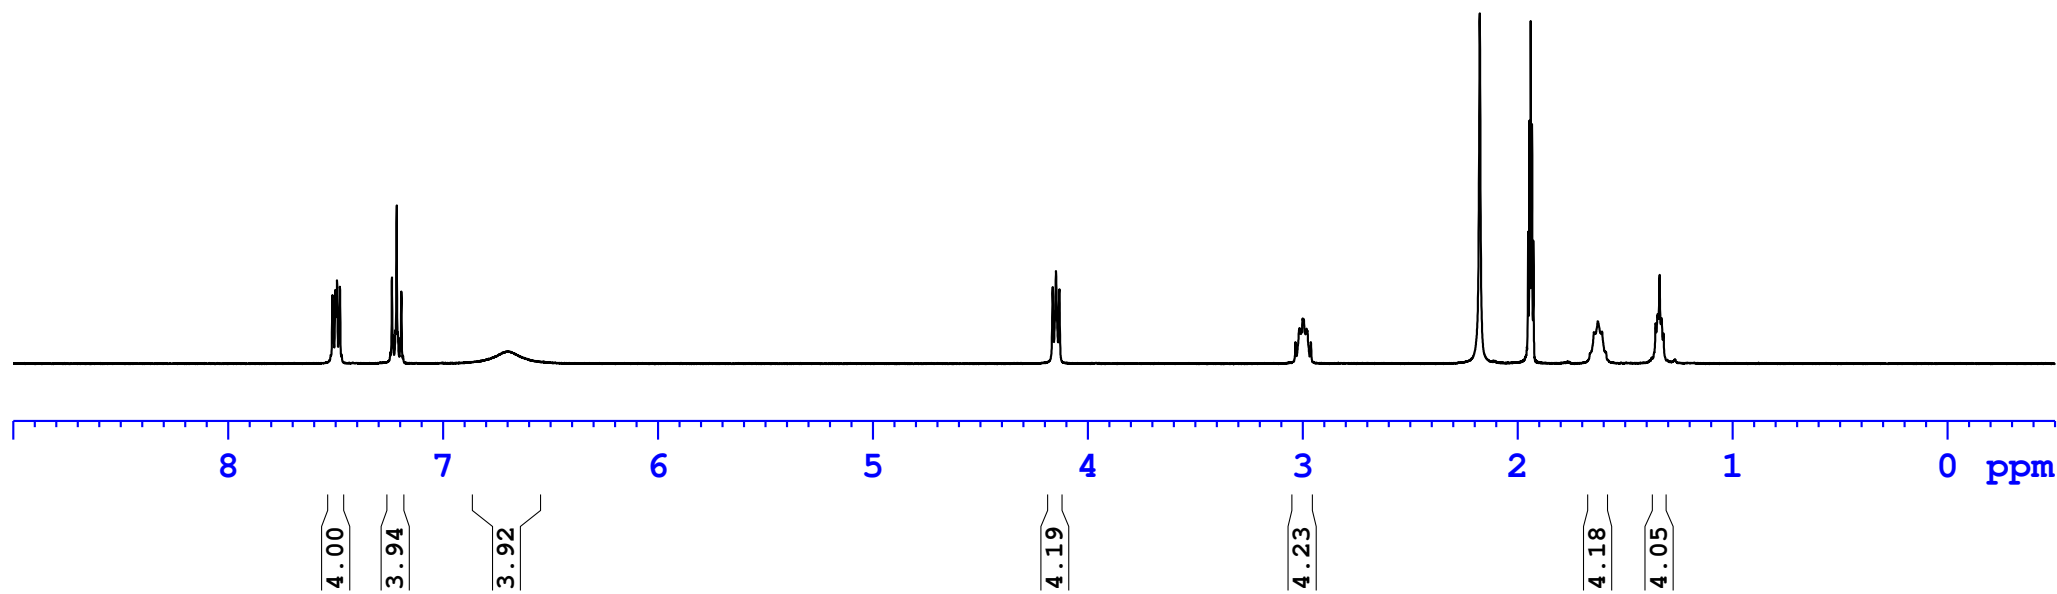

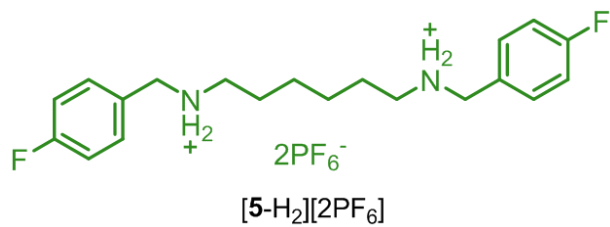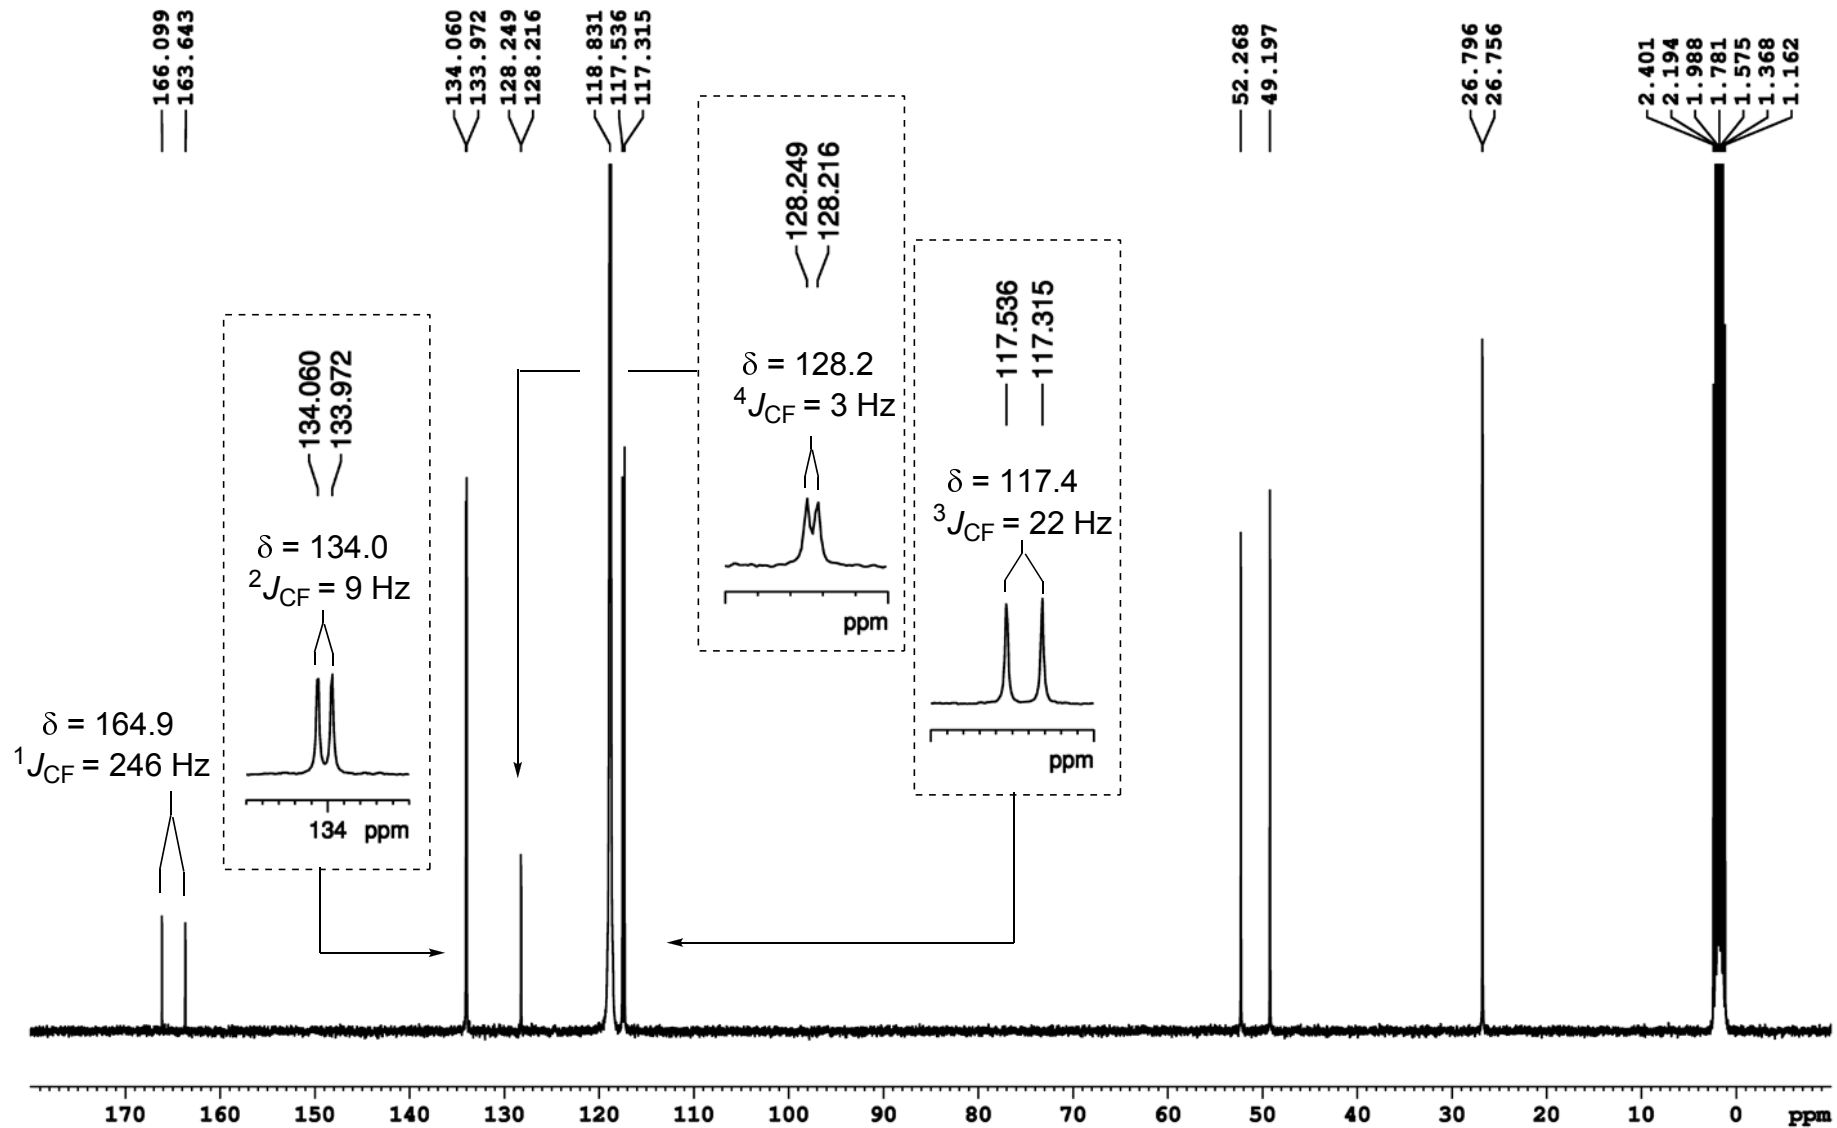

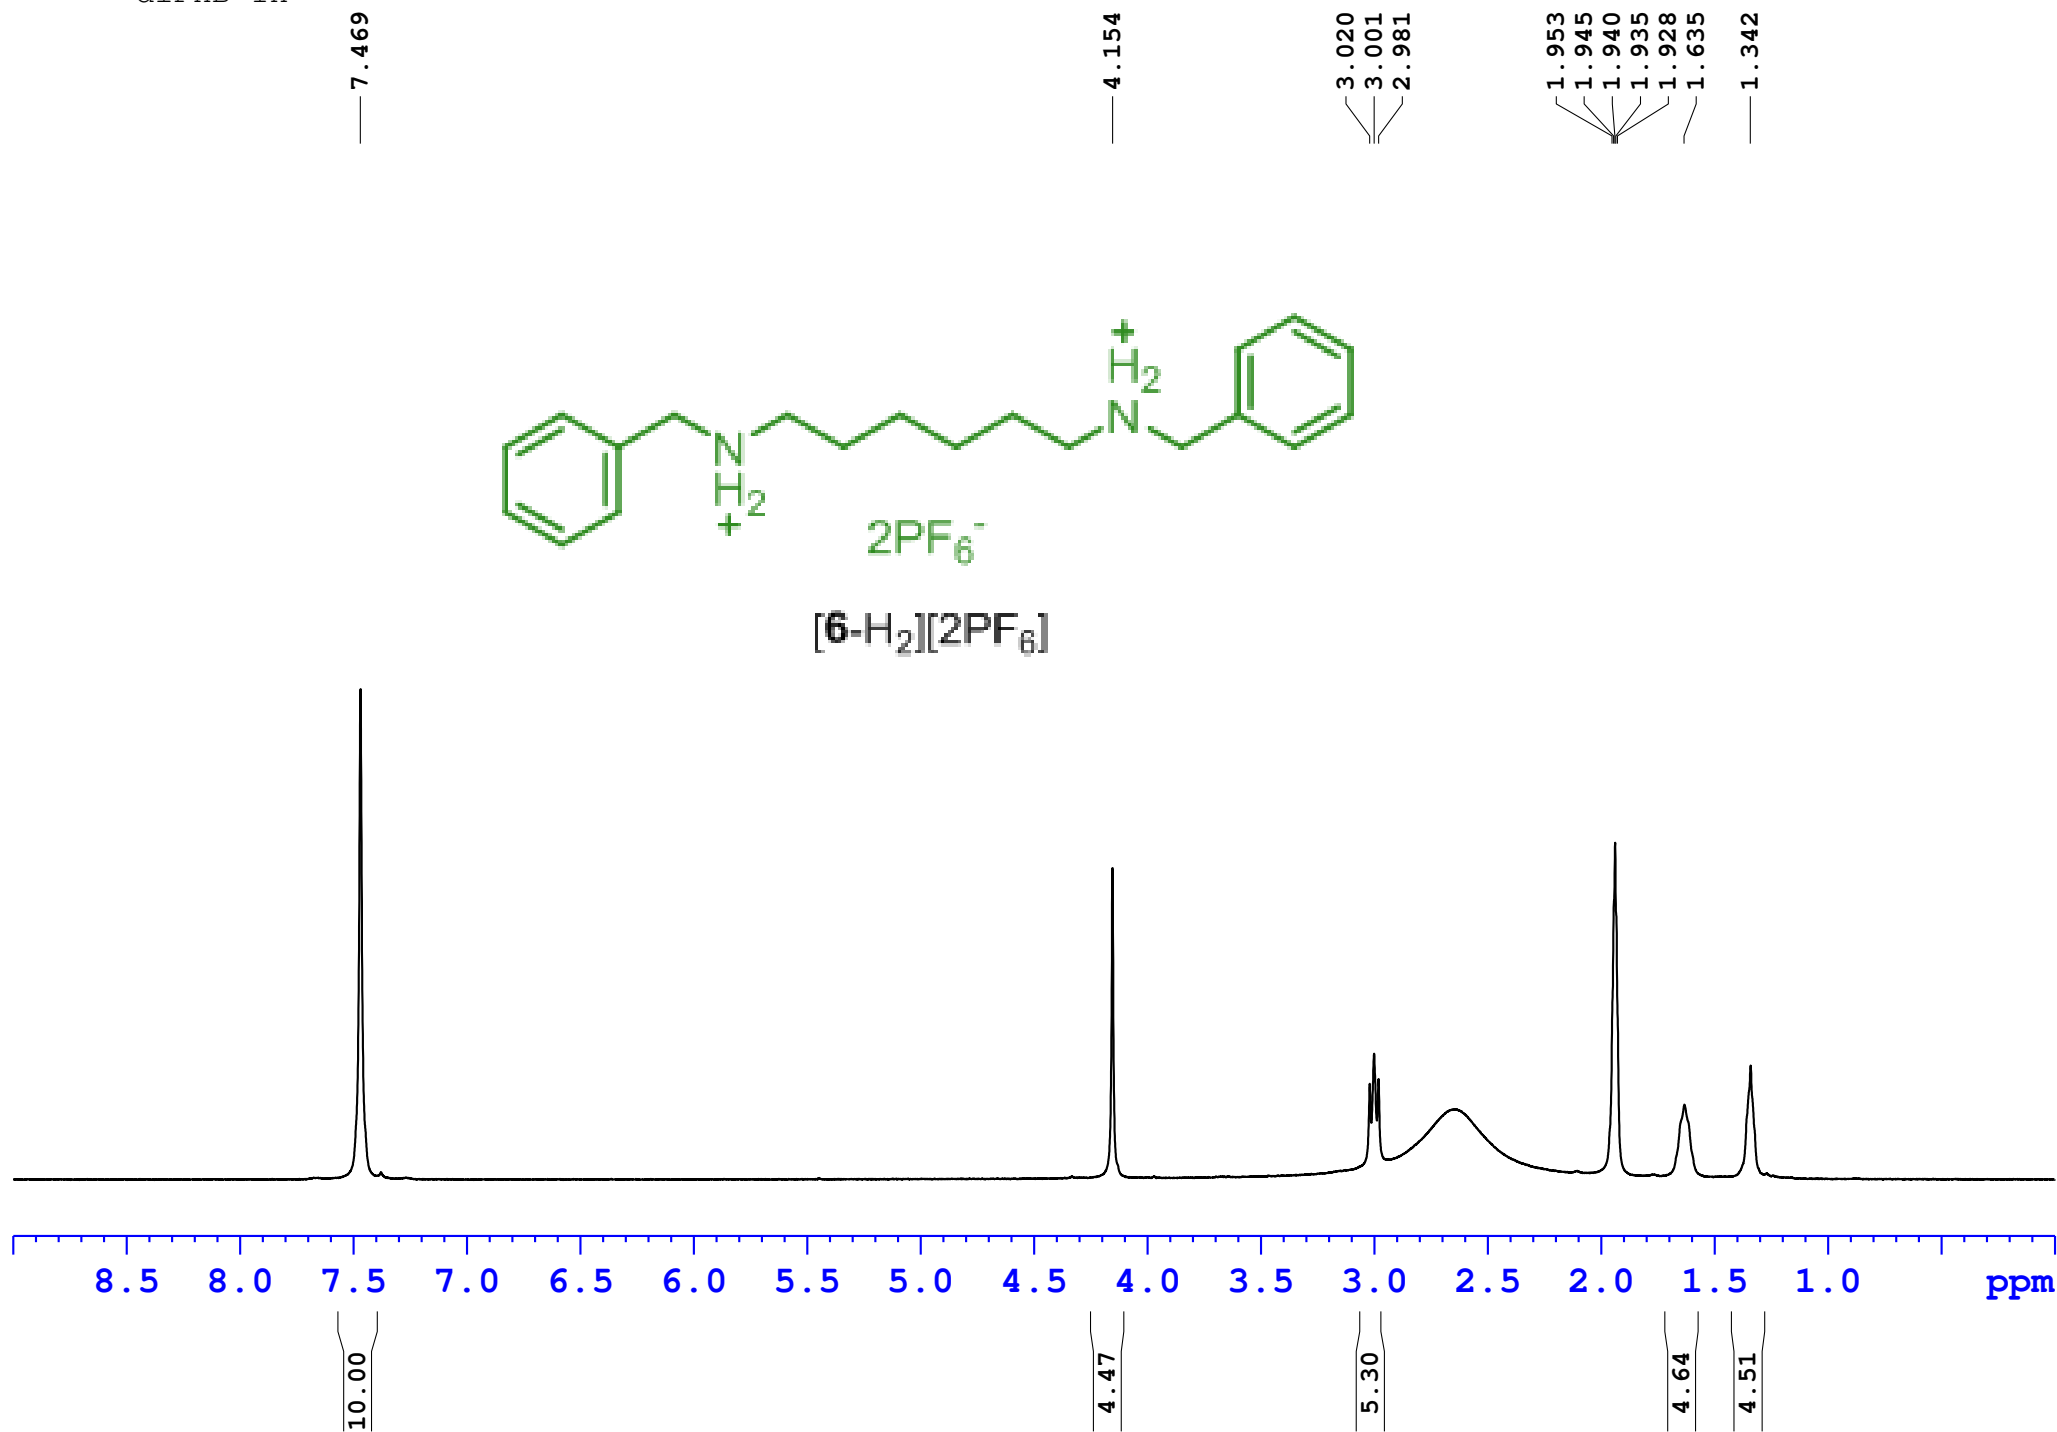

diPHB-1H

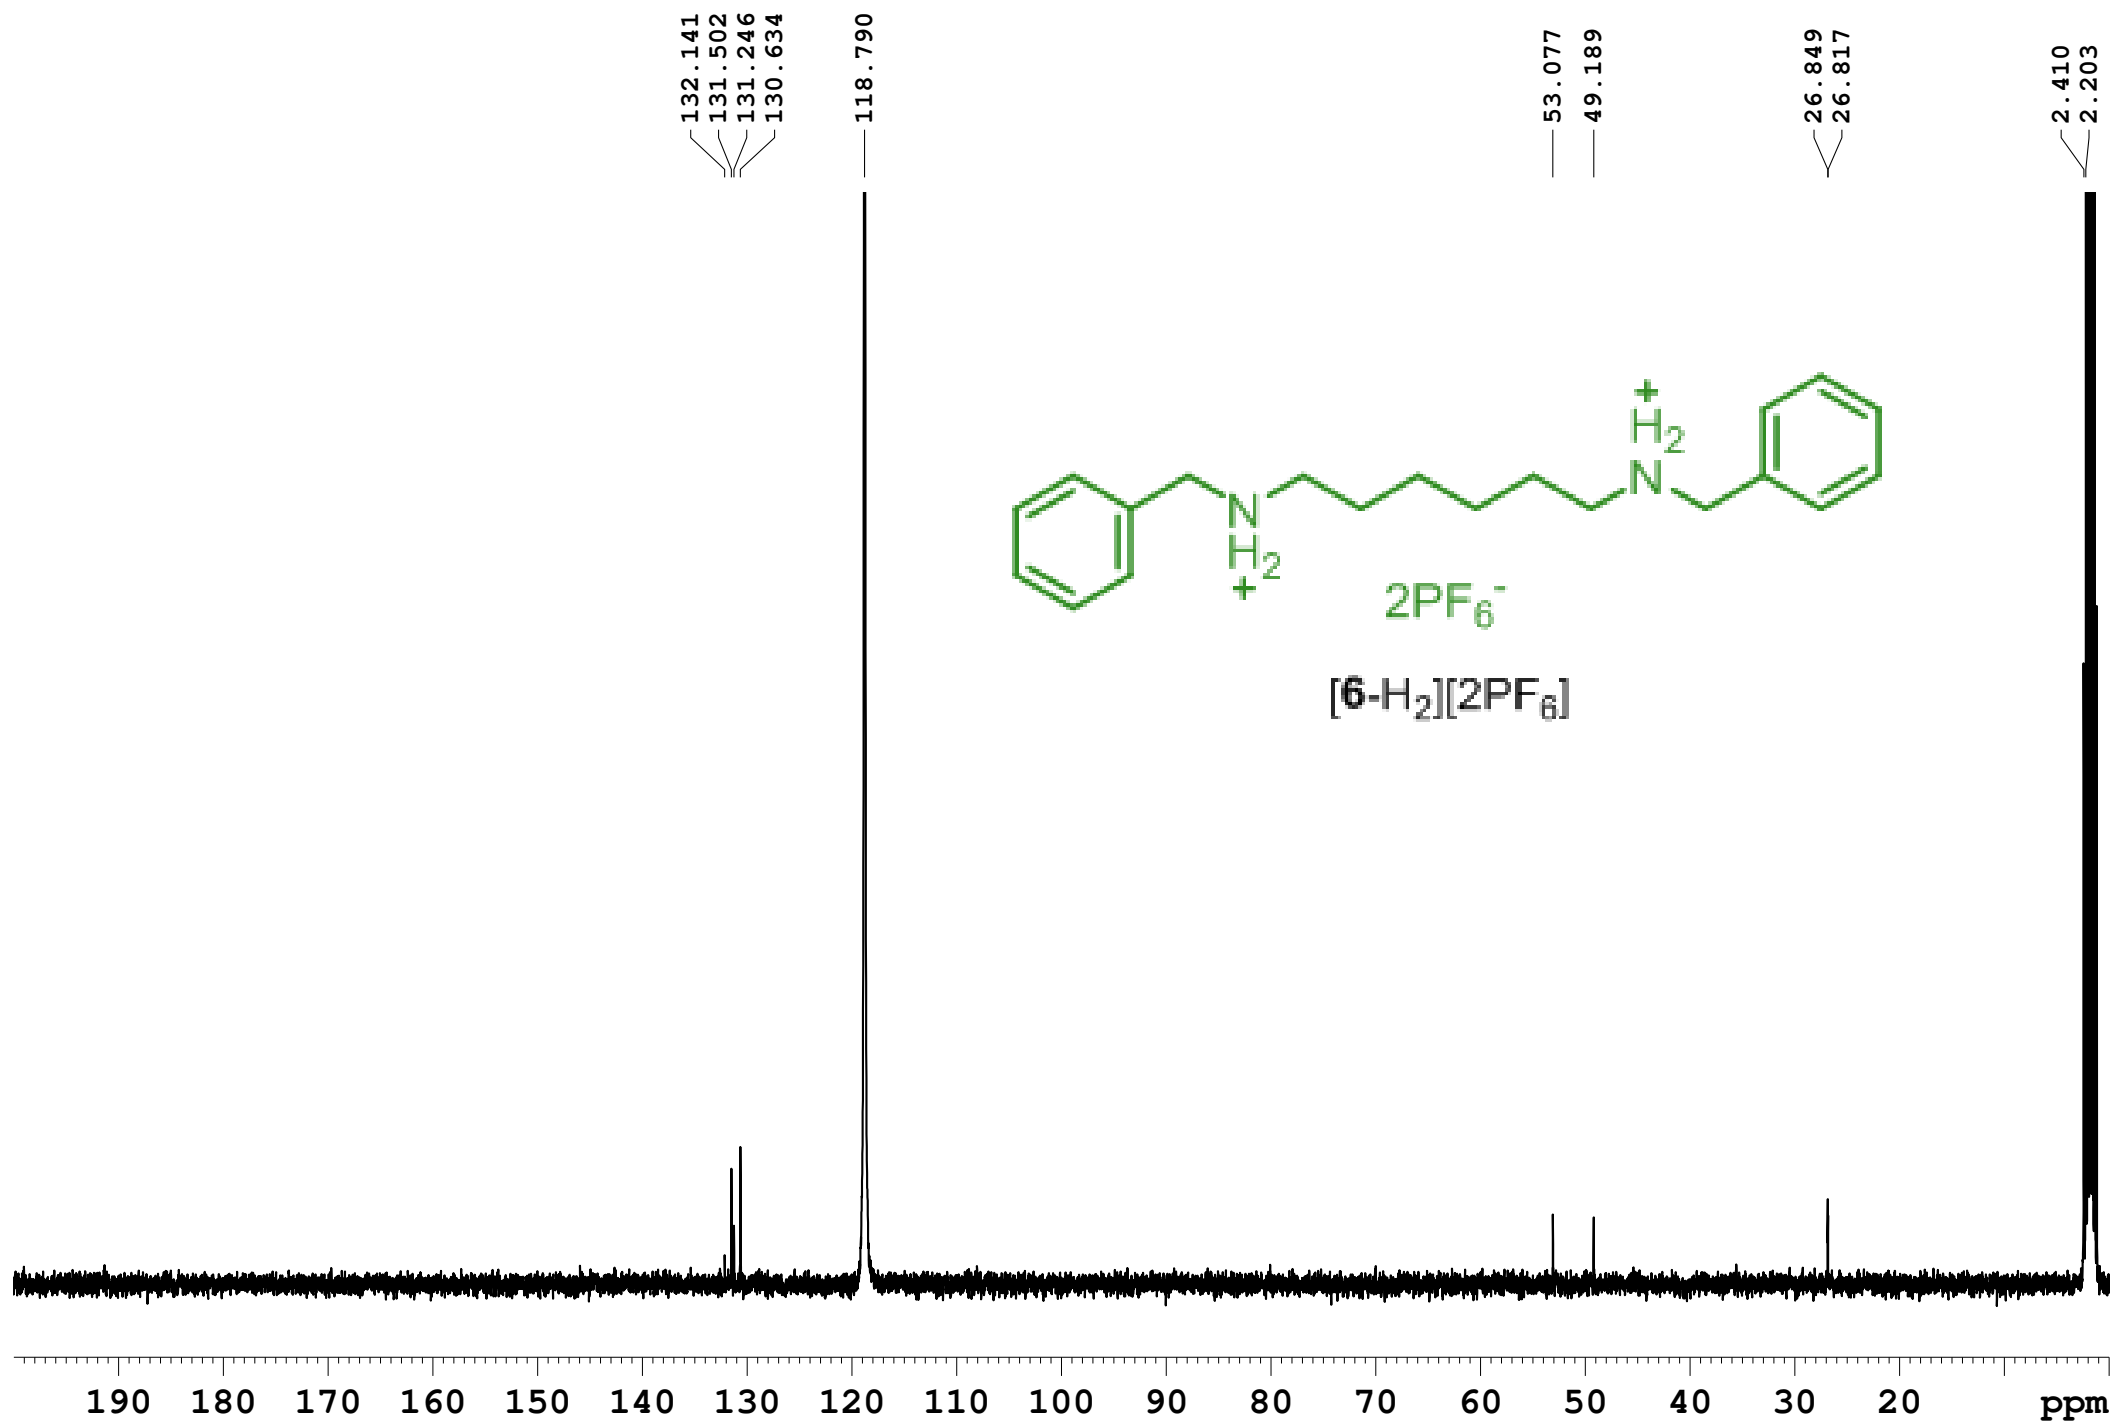

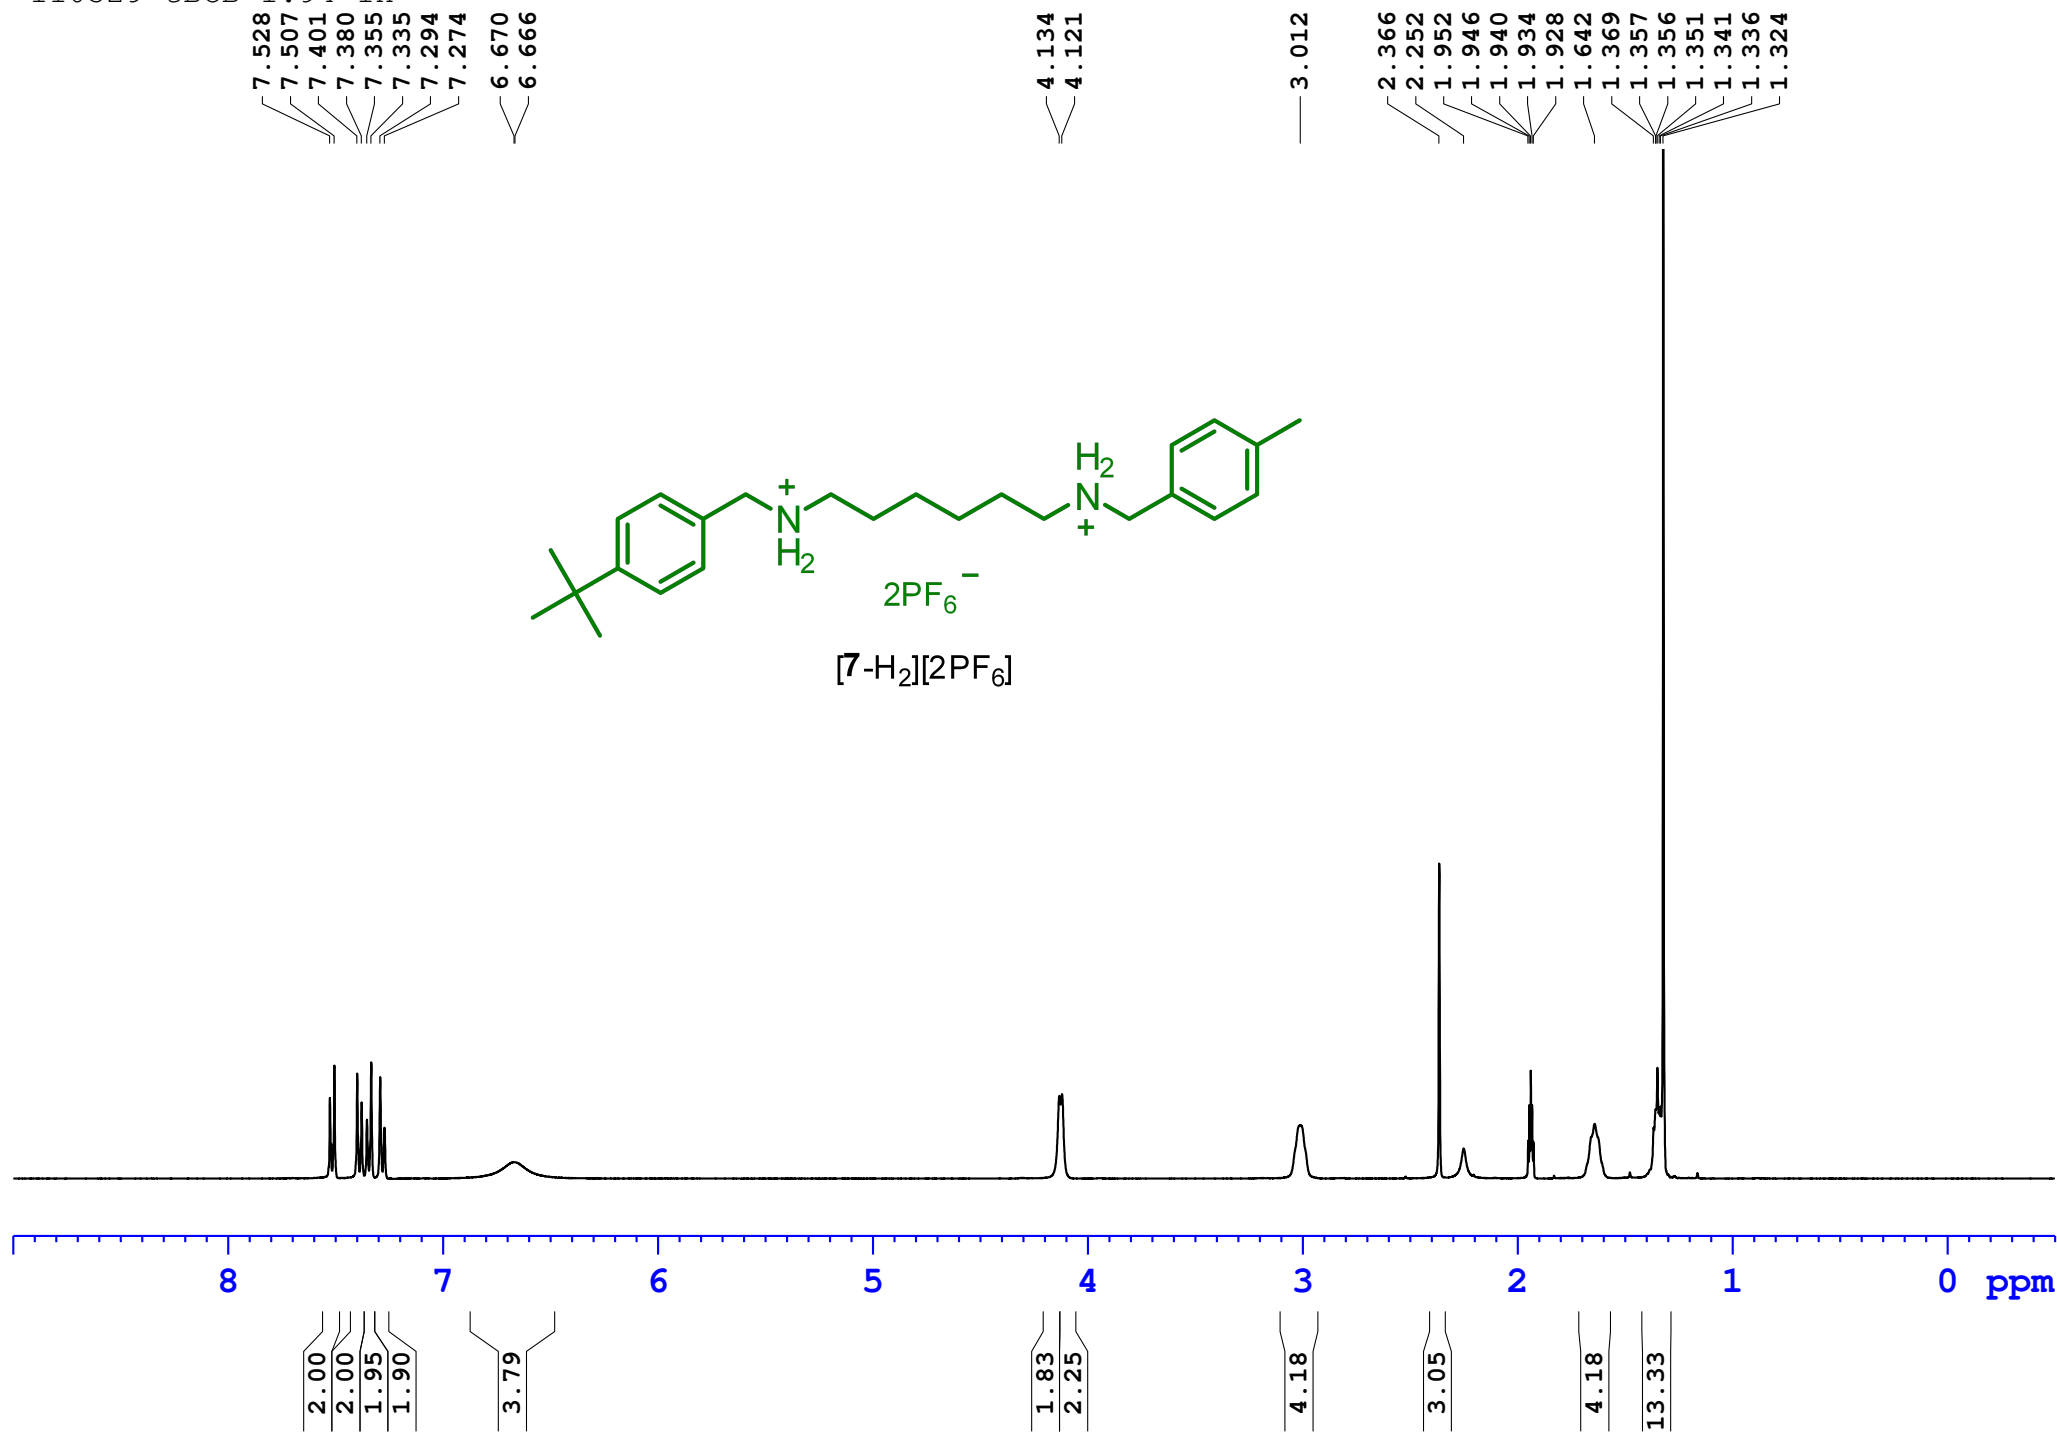

329-tBCB-1.94-

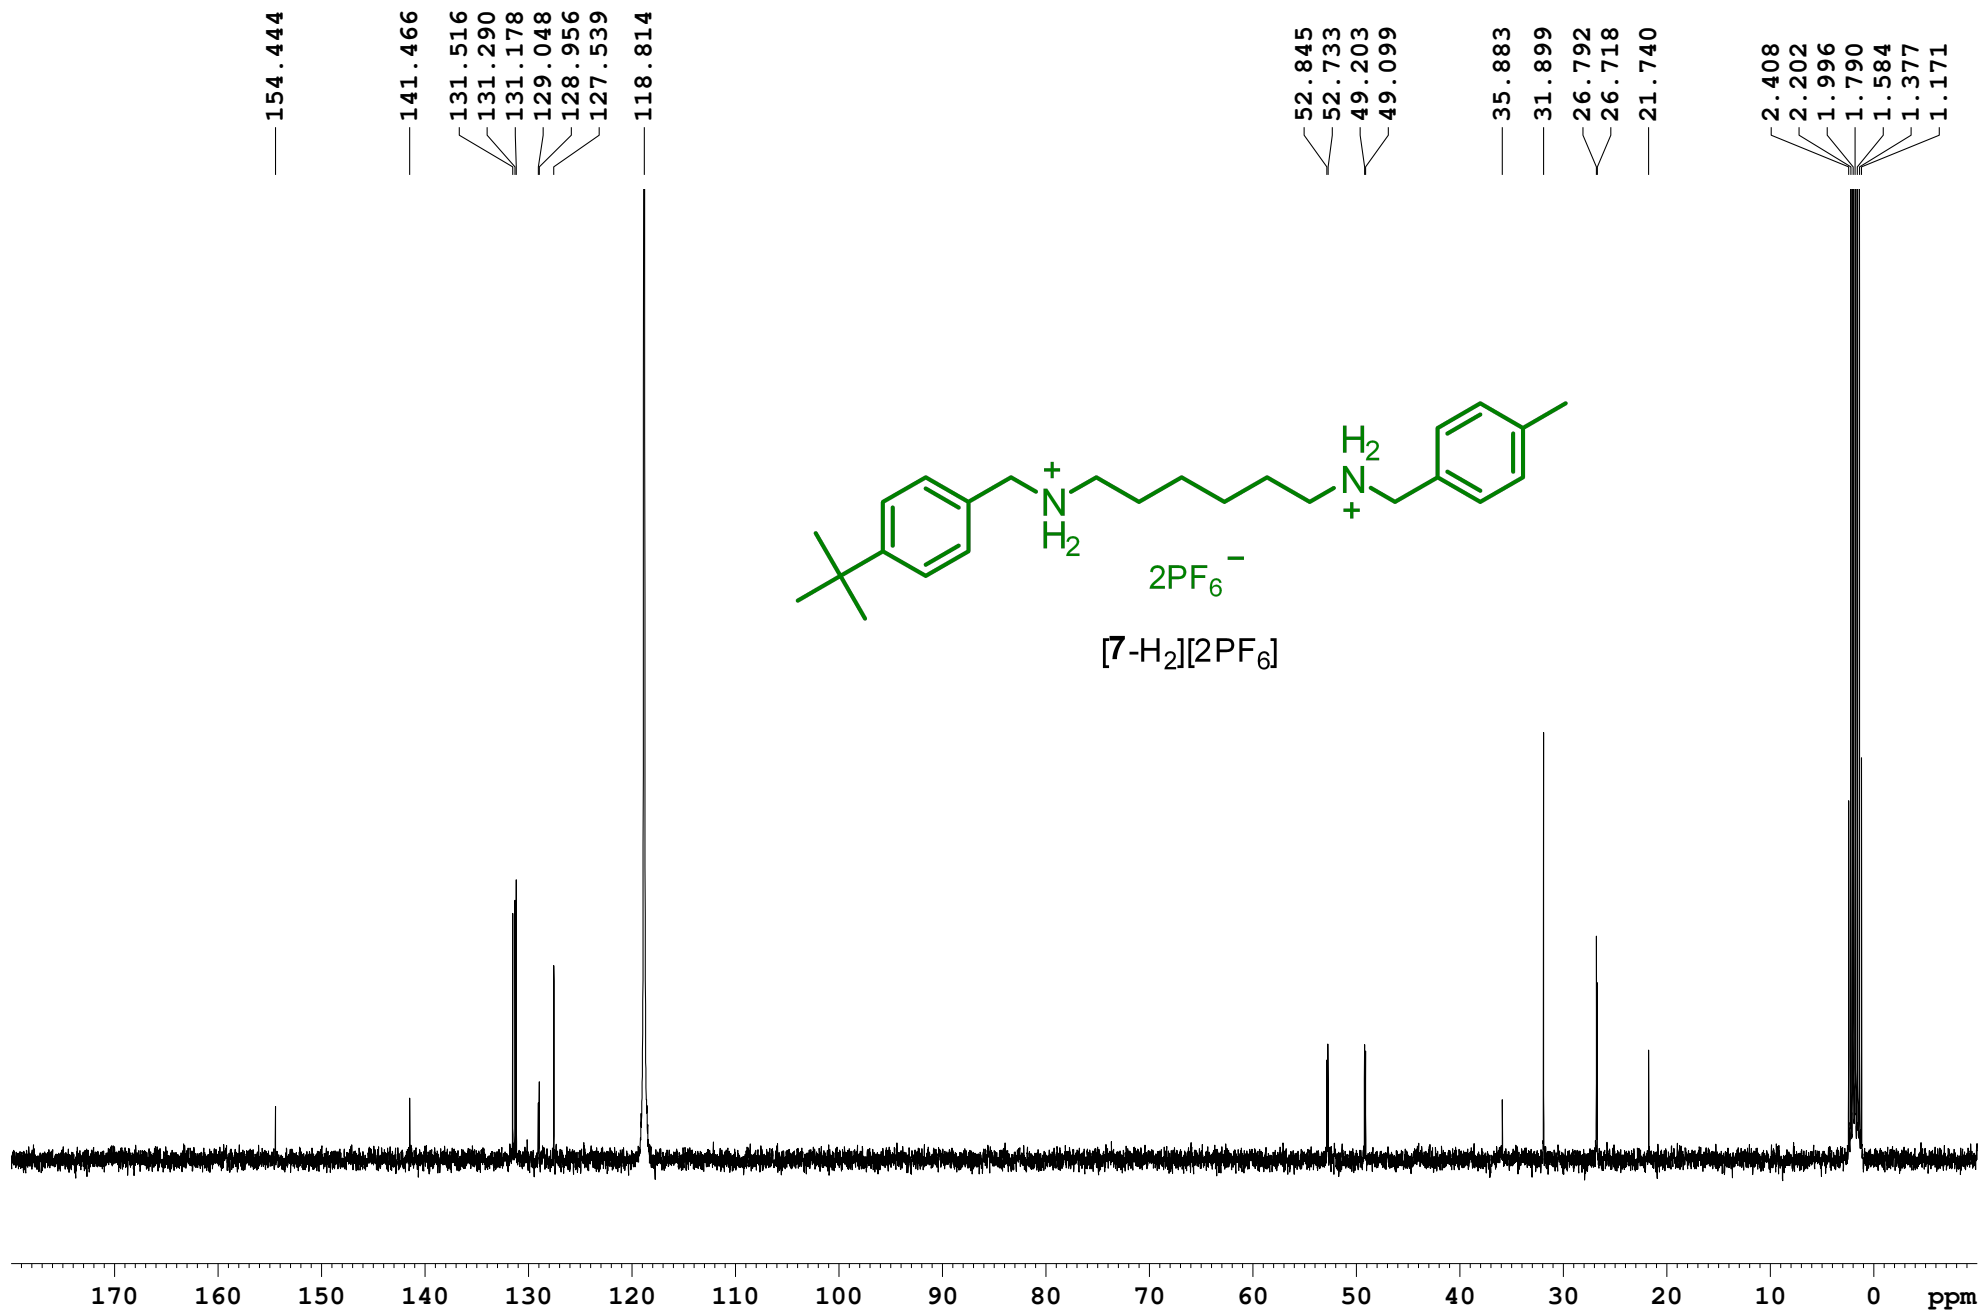



110226-tBN\*

7.334  
7.314  
7.240  
7.233  
7.213

3.735

2.677  
2.660  
2.642  
2.638  
2.620  
2.602

1.523  
1.506  
1.488  
1.470  
1.458  
1.440  
1.424  
1.408  
1.390  
1.329  
1.320  
1.274  
1.245

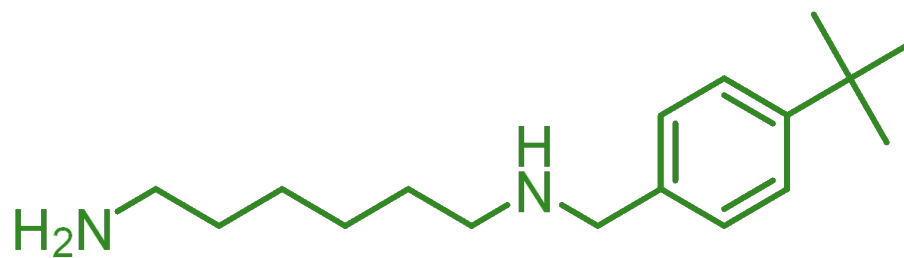

S1

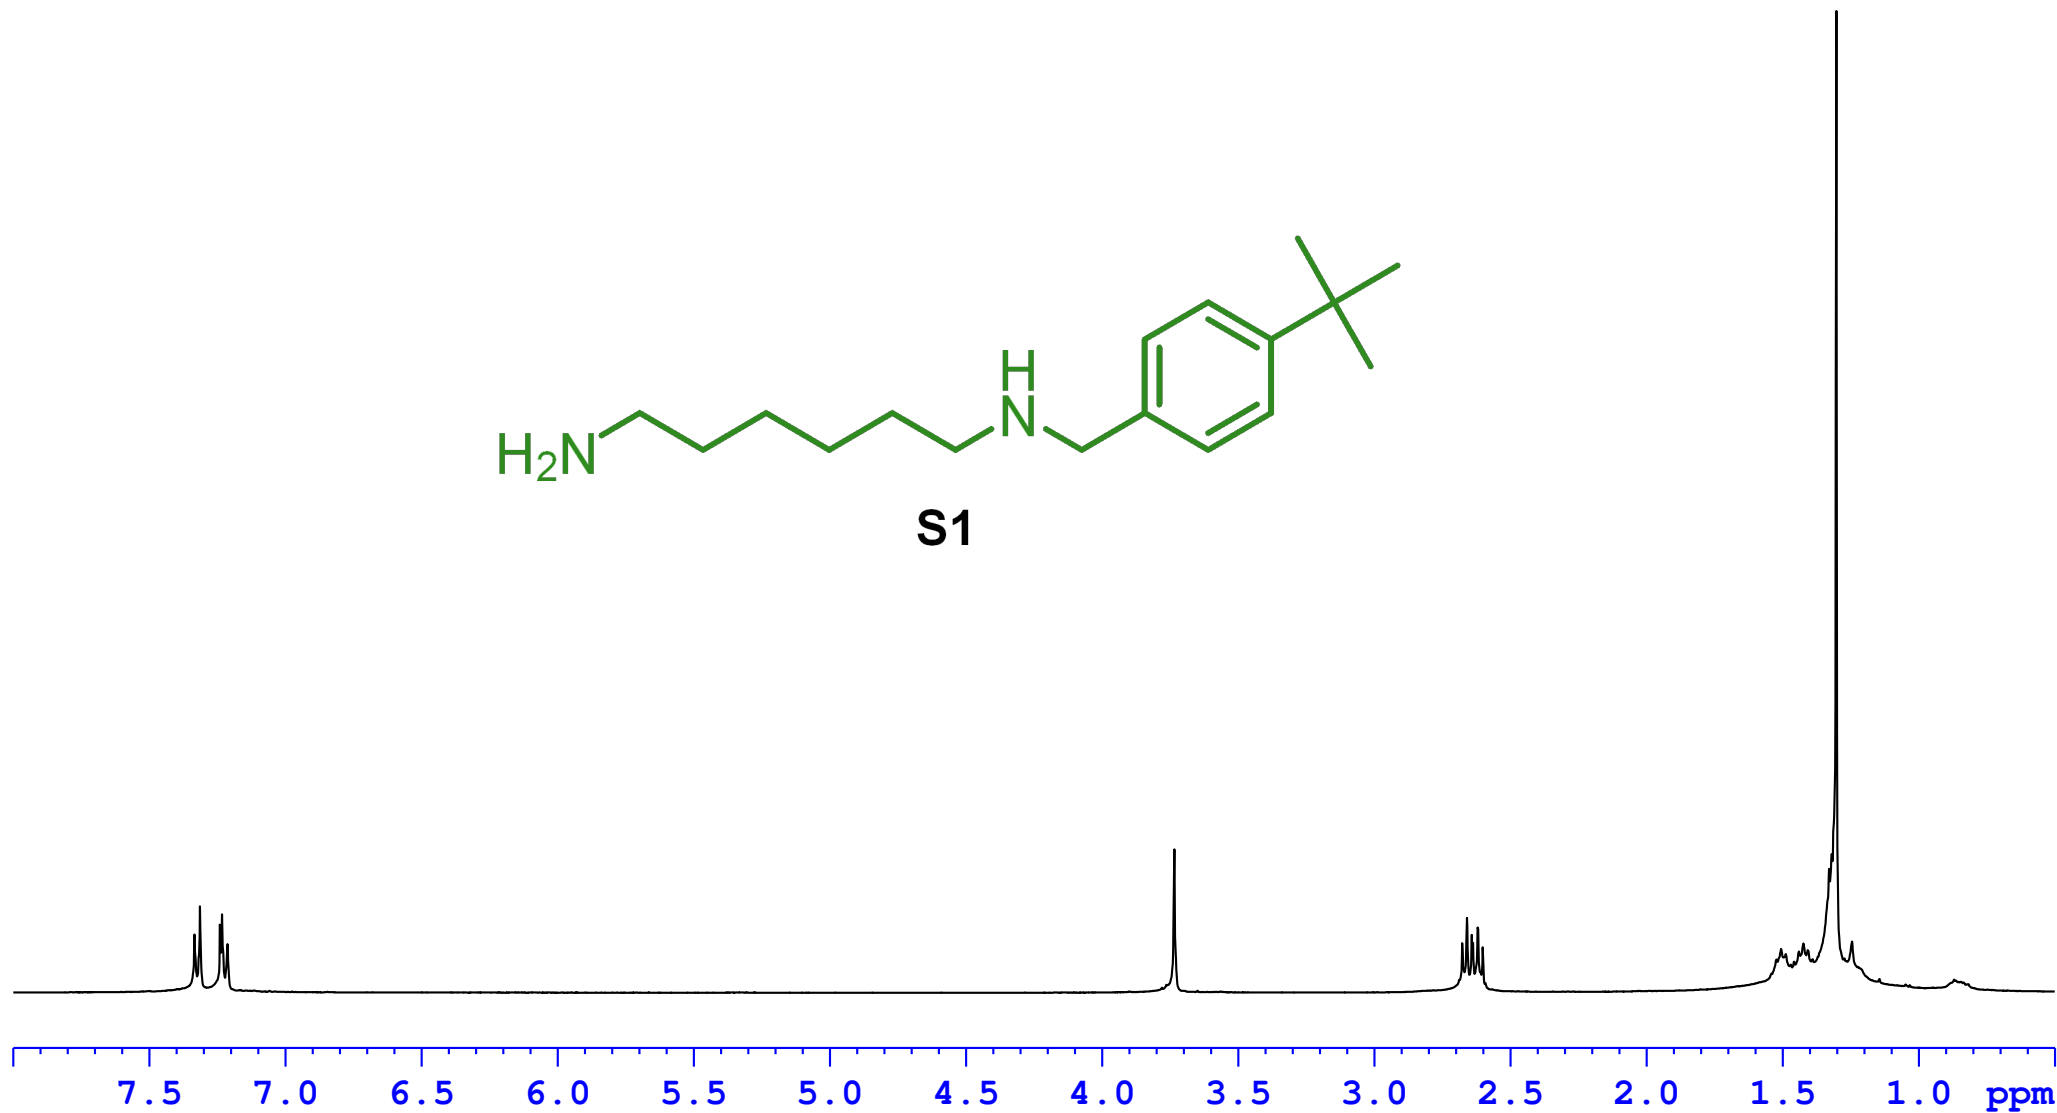

2.14  
2.27

2.00

4.14

26.11

S17

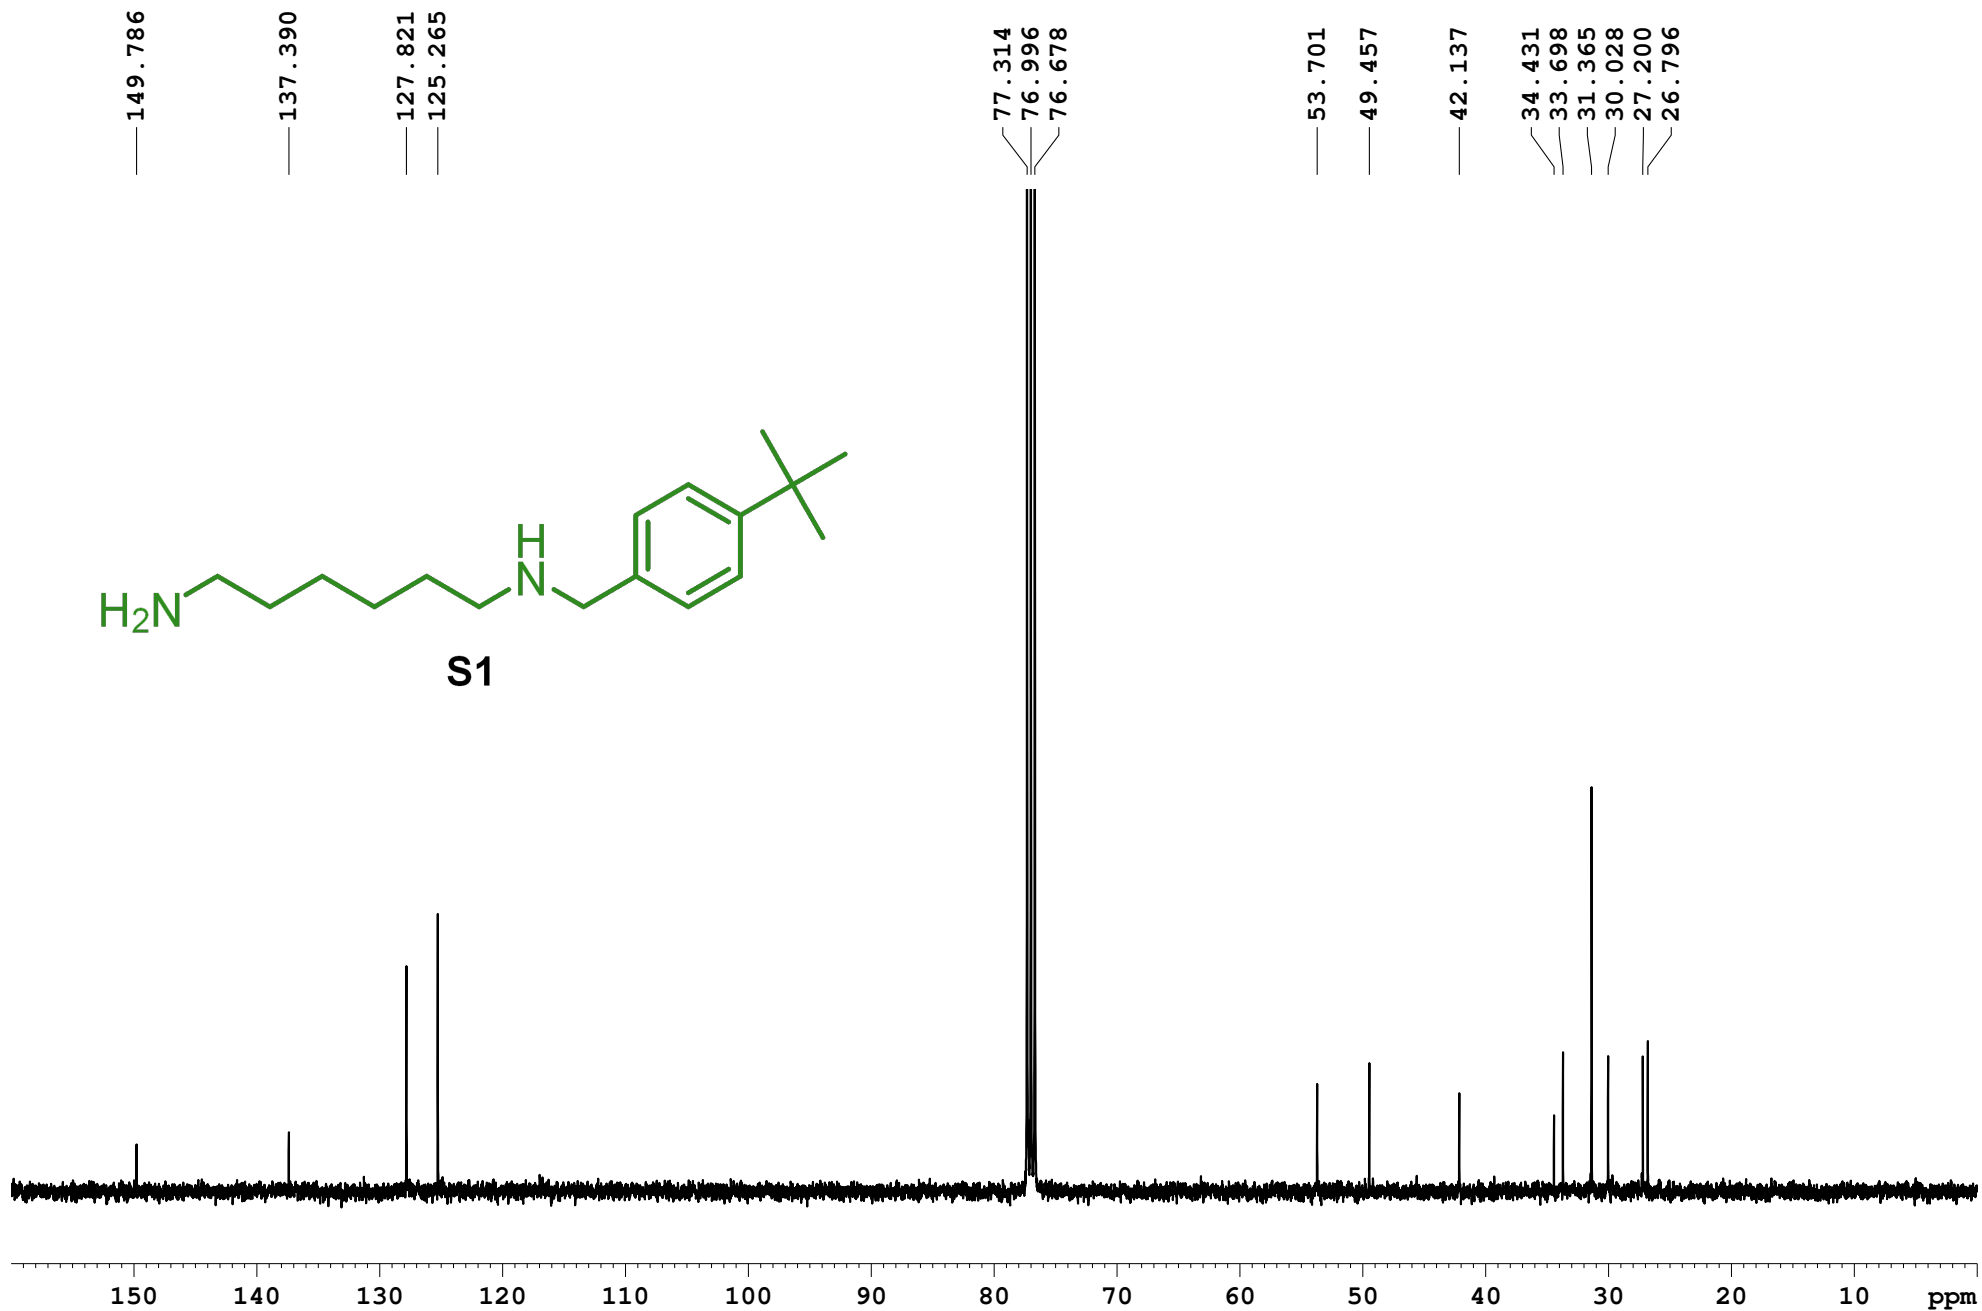

Figure S1

HC-HSQC, 400 MHz, CD<sub>3</sub>CN

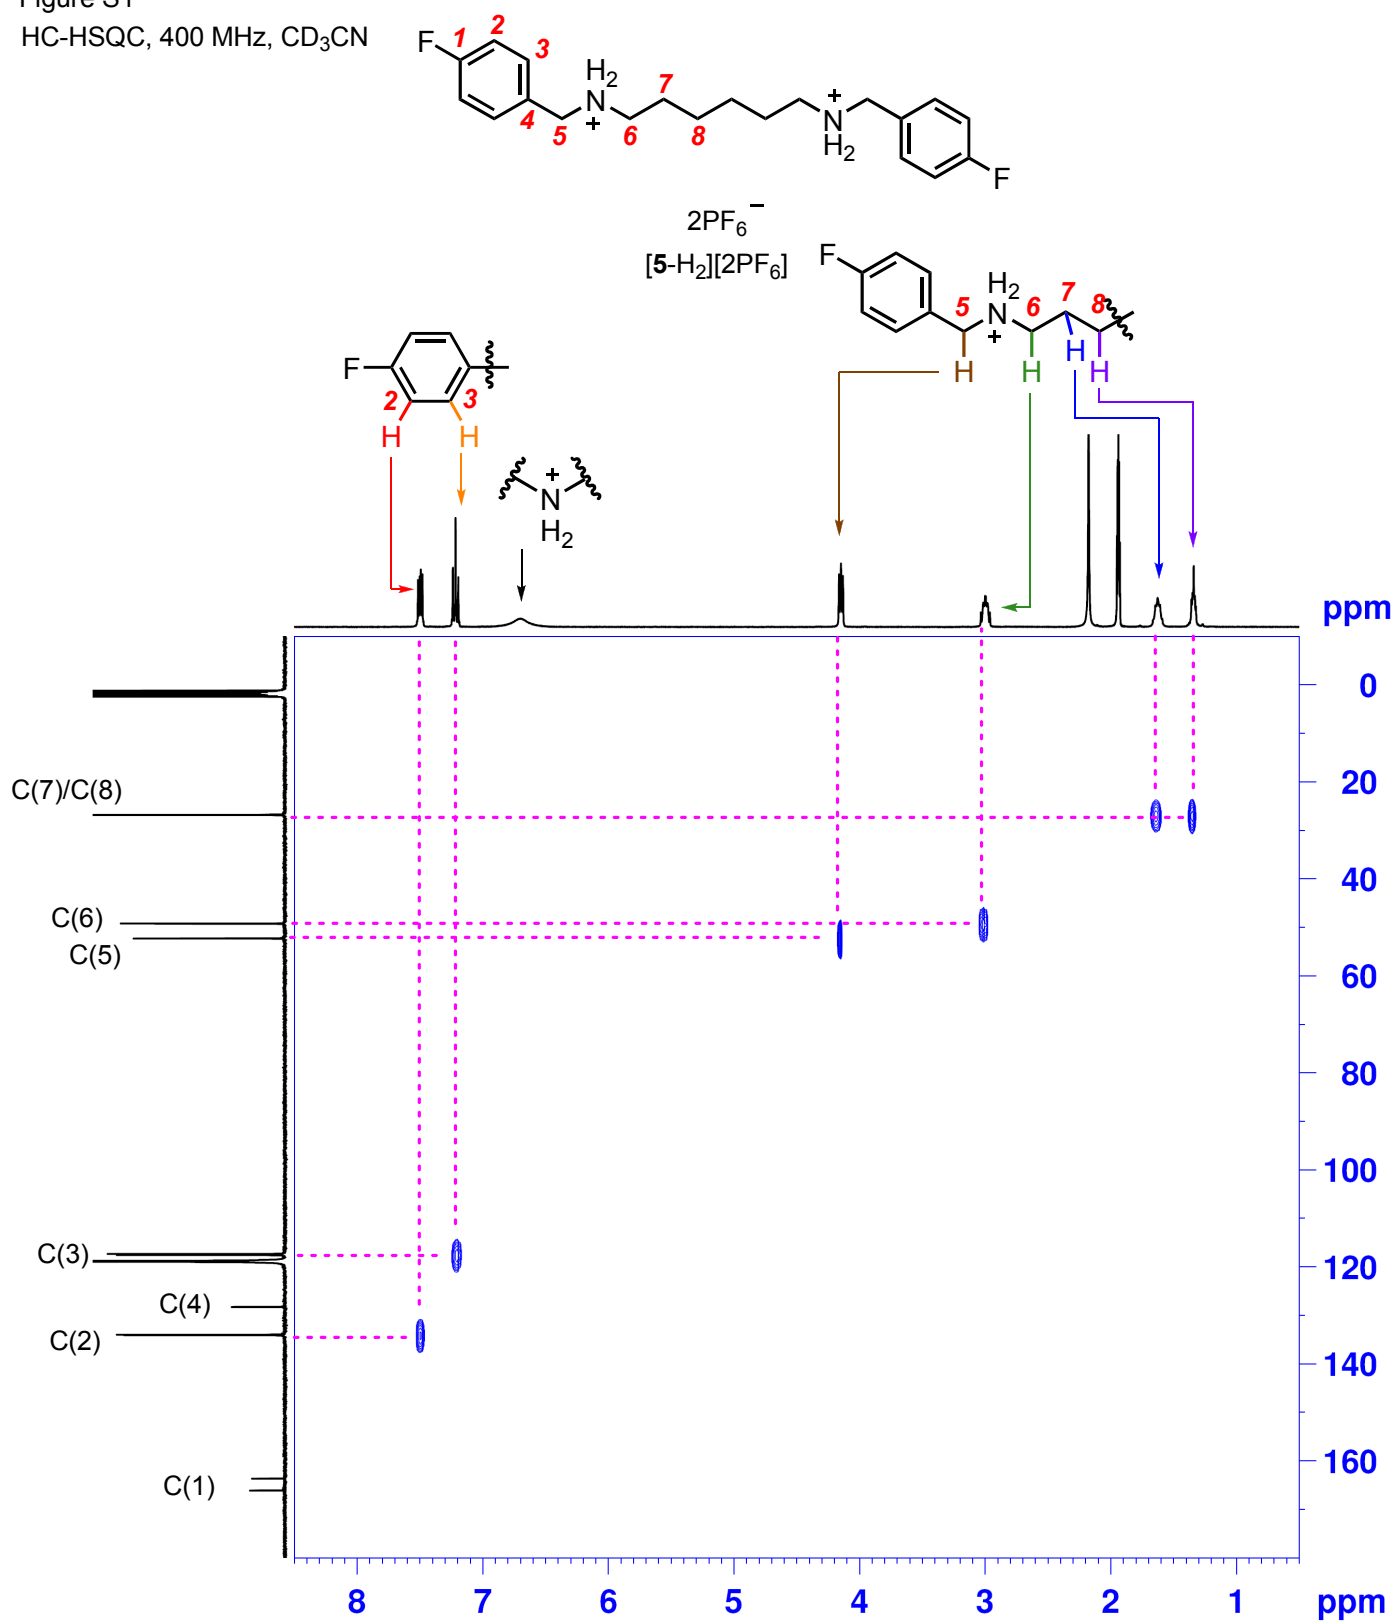

Figure S1. HSQC spectrum (400 MHz, CD<sub>3</sub>CN, 298 K) of the threadlike salt [5-H][2PF<sub>6</sub>].

The aromatic carbon signals of the threadlike salt [5-H][2PF<sub>6</sub>] were identified based on the C–F couplings and cross signals appeared in  $^{13}\text{C}$  NMR and HSQC spectra, respectively. The signals of the aliphatic protons were identified from their chemical shifts and cross signals appeared in HSQC spectra.

Figure S2

COSY of  $[1 \cdot 2\text{-H}_2][2\text{PF}_6]$

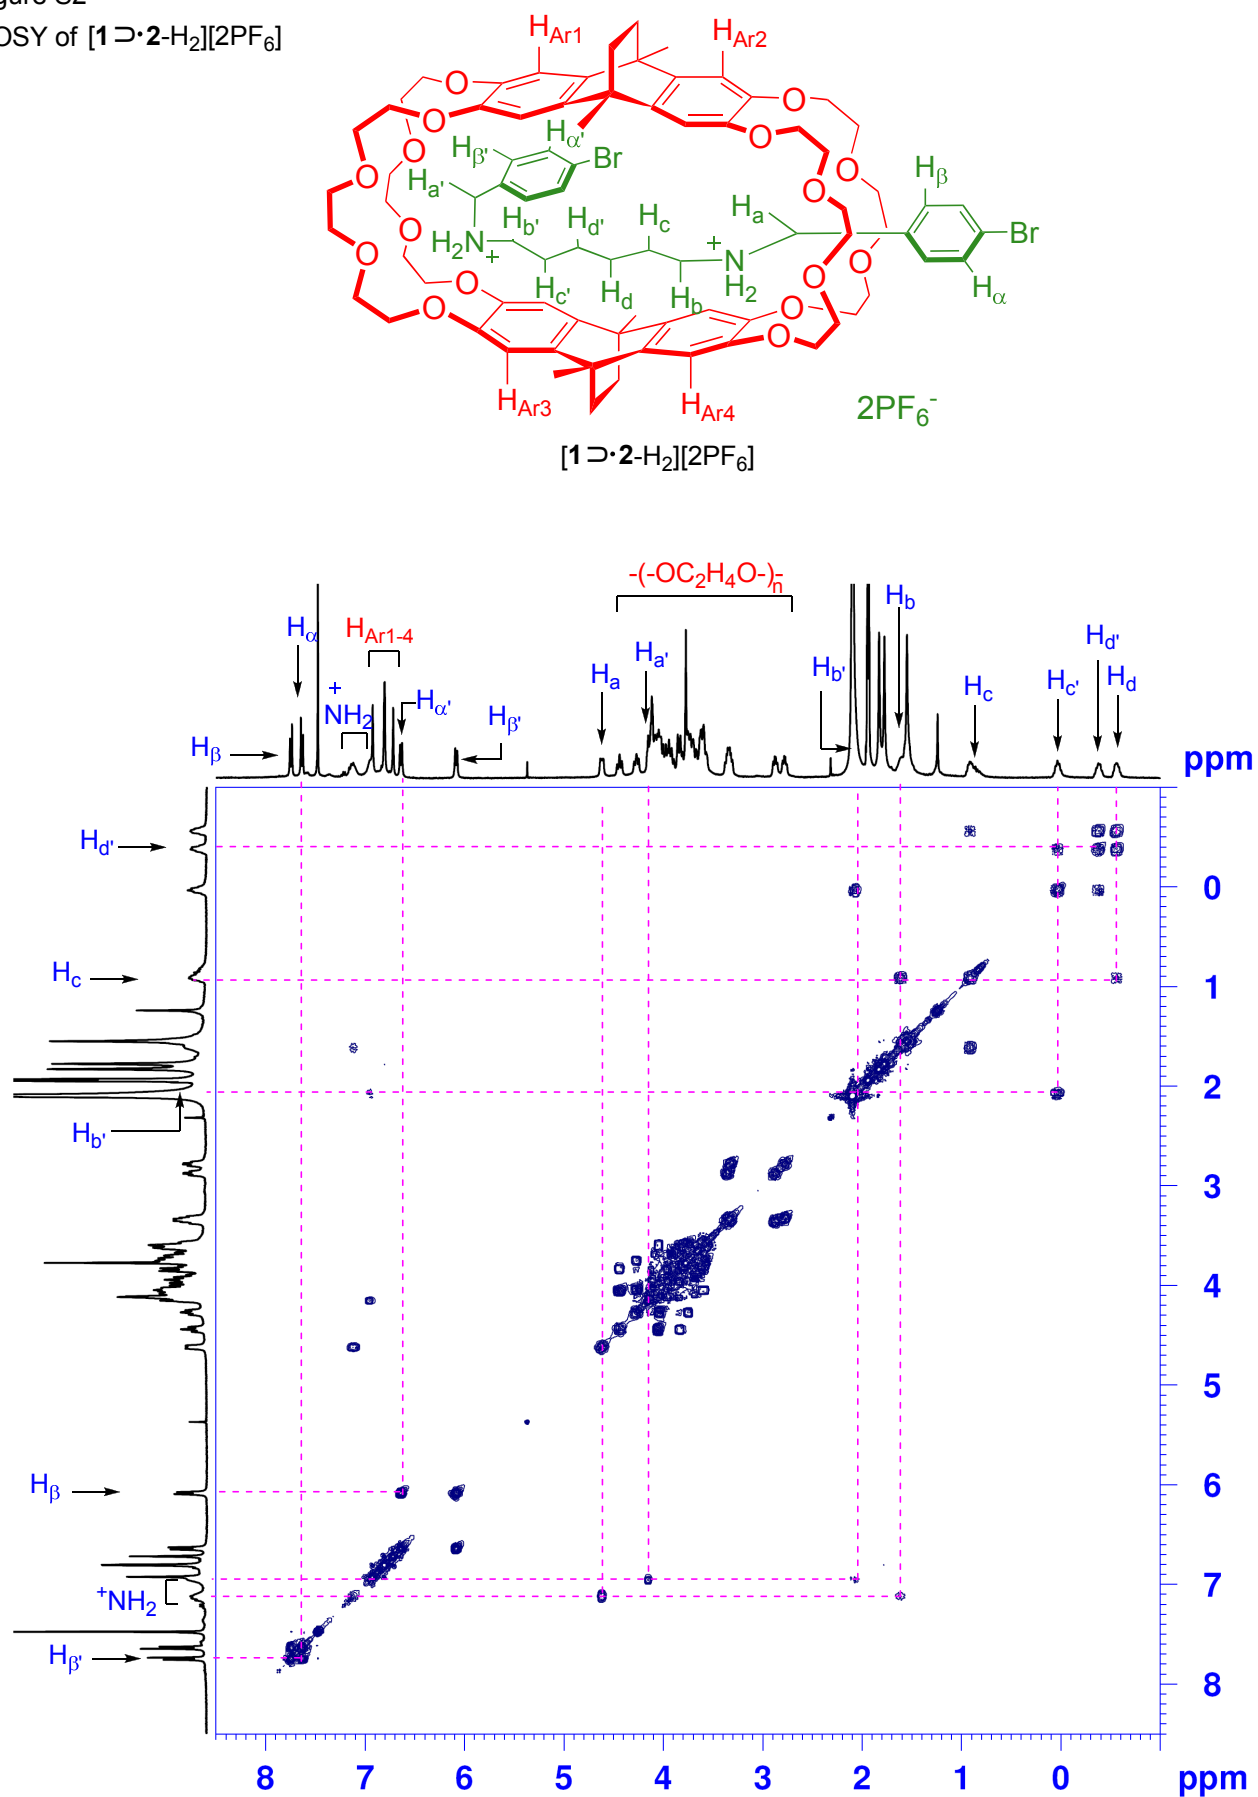

Figure S2. COSY spectrum [400 MHz,  $\text{CDCl}_3/\text{CD}_3\text{CN}$  (1:1), 298 K] of the complex  $[1 \cdot 2\text{-H}_2][2\text{PF}_6]$ , recorded after mixing the molecular cage **1** and the threadlike salt  $[2\text{-H}_2][2\text{PF}_6]$  at 298 K for 13 h.

Figure S3

NOESY of  $[1 \supset 2\text{-H}_2][2\text{PF}_6]$

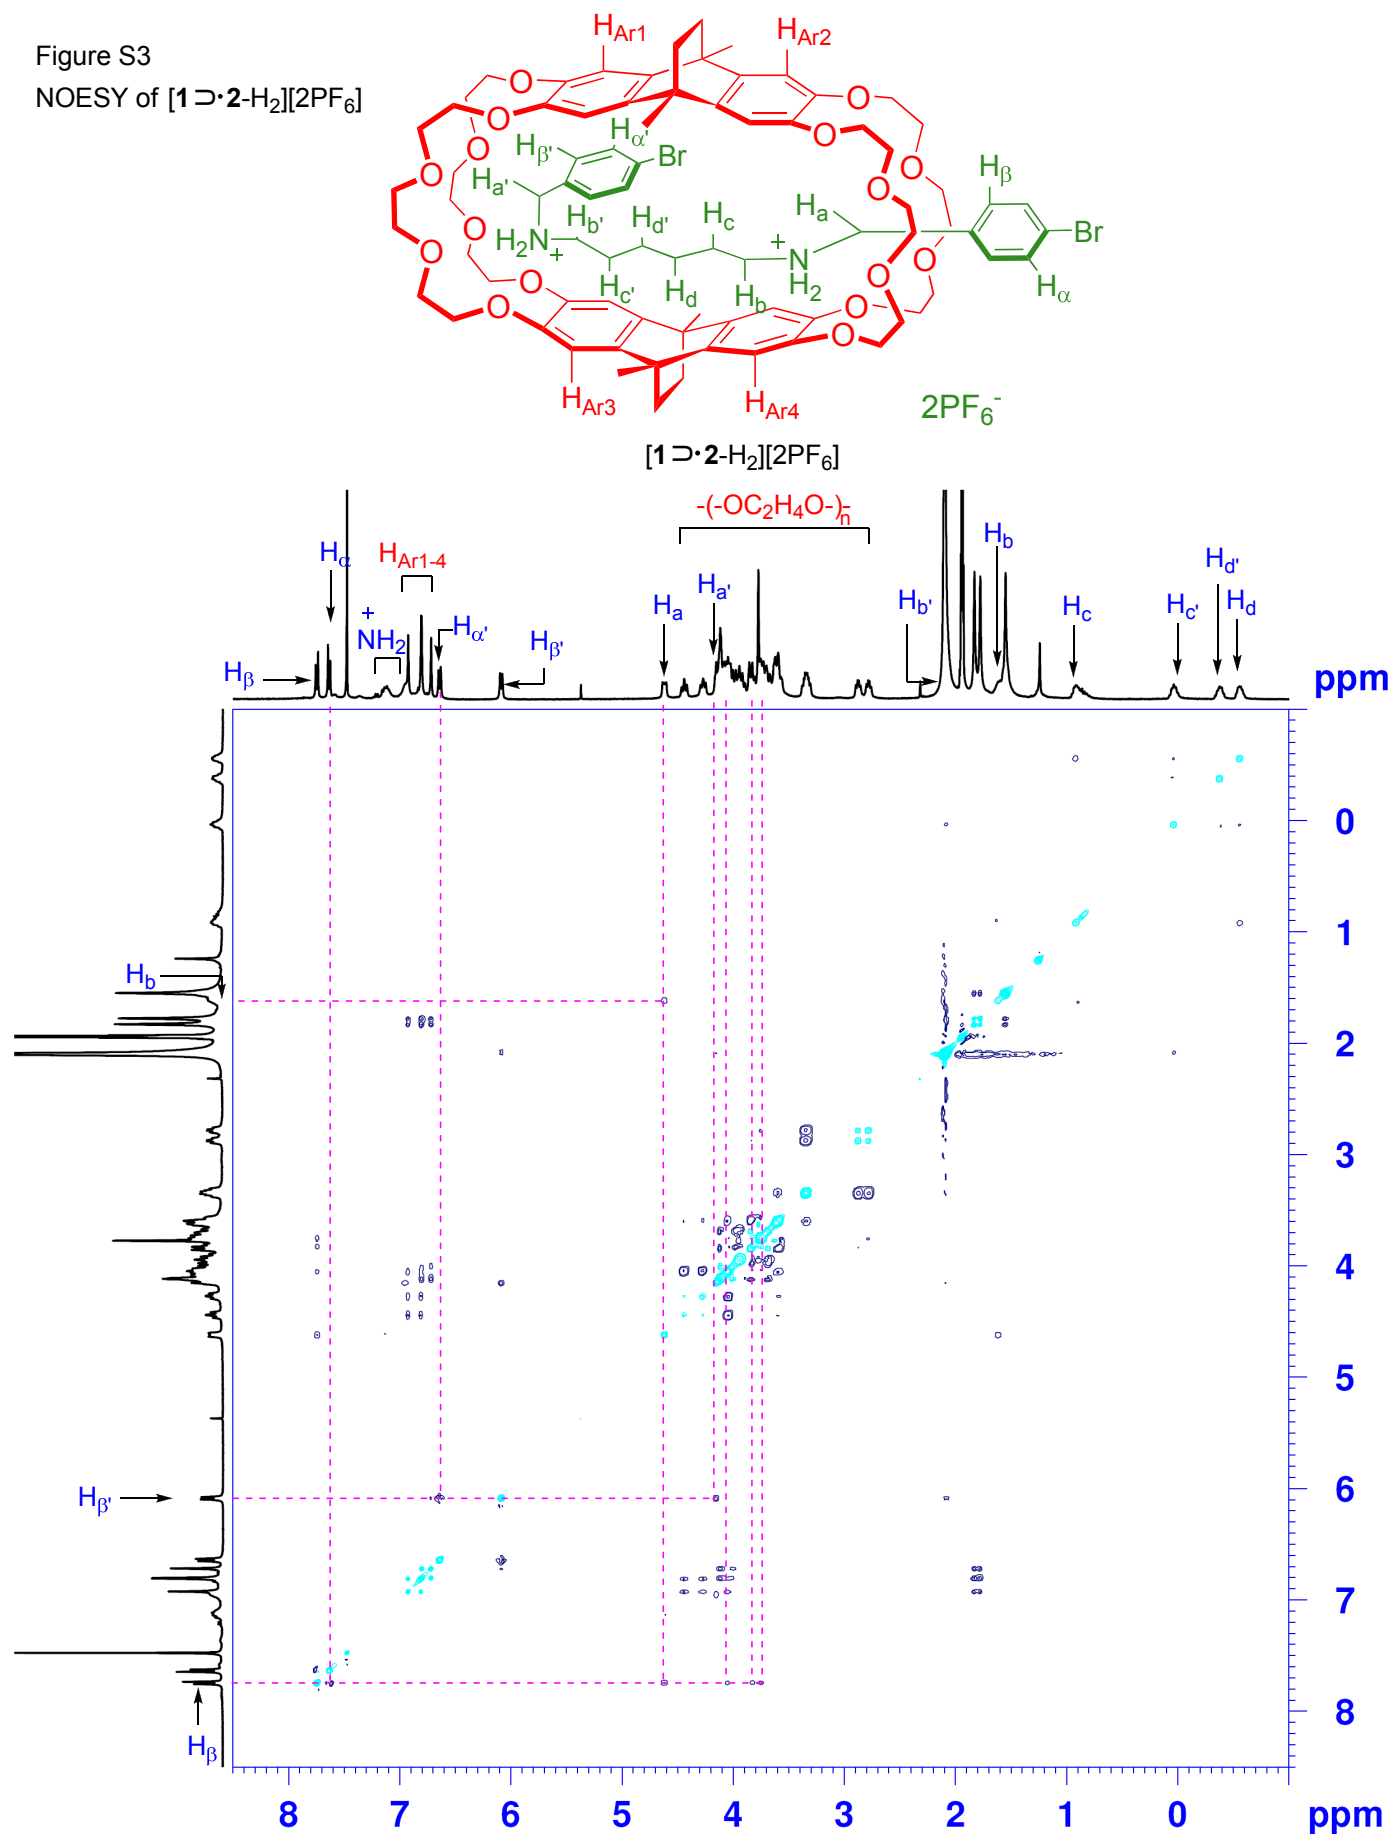

Figure S3. NOESY spectrum [400 MHz,  $CDCl_3/CD_3CN$  (1:1), 298 K] of the complex  $[1 \supset 2\text{-H}_2][2\text{PF}_6]$ , recorded after mixing the molecular cage 1 and the threadlike salt  $[2\text{-H}_2][2\text{PF}_6]$  at 298 K for 13.5 h.

## Assignment of Signals in $^1\text{H}$ NMR Spectra of the Complex [1 $\rightarrow$ 2- $\text{H}_2$ ][2 $\text{PF}_6$ ] Based on Its 2D COSY and NOESY Spectra

### From NOESY

$\text{H}_\alpha$  ( $\delta = 4.62$ )  $\rightarrow$   $\text{H}_\beta$  ( $\delta = 7.74$ )  $\rightarrow$   $\text{H}_\alpha$  ( $\delta = 7.63$ ) and  $-(\text{OCH}_2\text{CH}_2\text{O})-$  [protons of the tri(ethylene glycol) chains of host **1**;  $\delta = 3.54$ – $4.19$ ]

$\text{H}_{\beta'}$  ( $\delta = 6.08$ )  $\rightarrow$   $\text{H}_{\alpha'}$  ( $\delta = 6.64$ ) and  $\text{H}_{\alpha'}$  [ $\delta = 4.14$ – $4.19$ , overlapped with  $-(\text{OCH}_2\text{CH}_2\text{O})-$ ]

$\text{H}_\alpha$  was the characteristic signal for benzylic protons adjacent to an  $^+\text{NH}_2$  center threaded through the cavity of DB24C8.

$\text{H}_{\beta'}$  was shielded strongly by the aromatic moiety of the molecular cage and shifted upfield significantly.

### From COSY

$\text{H}_\beta$  ( $\delta = 7.74$ )  $\rightarrow$   $\text{H}_\alpha$  ( $\delta = 7.63$ )

$\text{H}_{\beta'}$  ( $\delta = 6.08$ )  $\rightarrow$   $\text{H}_{\alpha'}$  ( $\delta = 6.64$ )

$\text{H}_\alpha$  ( $\delta = 4.62$ )  $\rightarrow$   $^+\text{NH}_2$  ( $\delta = 7.05$ – $7.18$ , threaded)  $\rightarrow$   $\text{H}_b$  ( $\delta = 1.59$ – $1.67$ )

$^+\text{NH}_2$  ( $\delta = 6.90$ – $7.01$ , face-to-face complexed)  $\rightarrow$   $\text{H}_{\alpha'}$  ( $\delta = 4.14$ – $4.19$ ) and  $\text{H}_{b'}$  ( $\delta = 2.00$ – $2.08$ )

The threaded  $^+\text{NH}_2$  center may experience stronger [ $^+\text{N}-\text{H}\cdots\text{O}$ ] hydrogen bonding interactions, thereby shifting it further downfield relative to the face-to-face complexes one.

$\text{H}_b$  ( $\delta = 1.59$ – $1.67$ )  $\rightarrow$   $\text{H}_c$  ( $\delta = 0.87$ – $0.97$ )  $\rightarrow$   $\text{H}_d$  ( $\delta = -0.62$  to  $-0.50$ )  $\rightarrow$   $\text{H}_{d'}$  ( $\delta = -0.44$  to  $-0.33$ )  $\rightarrow$   $\text{H}_{c'}$  ( $\delta = -0.04$  to  $+0.11$ )  $\rightarrow$   $\text{H}_{b'}$  ( $\delta = 2.00$ – $2.08$ )

Figure S4

COSY of  $[1 \supset 3\text{-H}_2][2\text{PF}_6]$

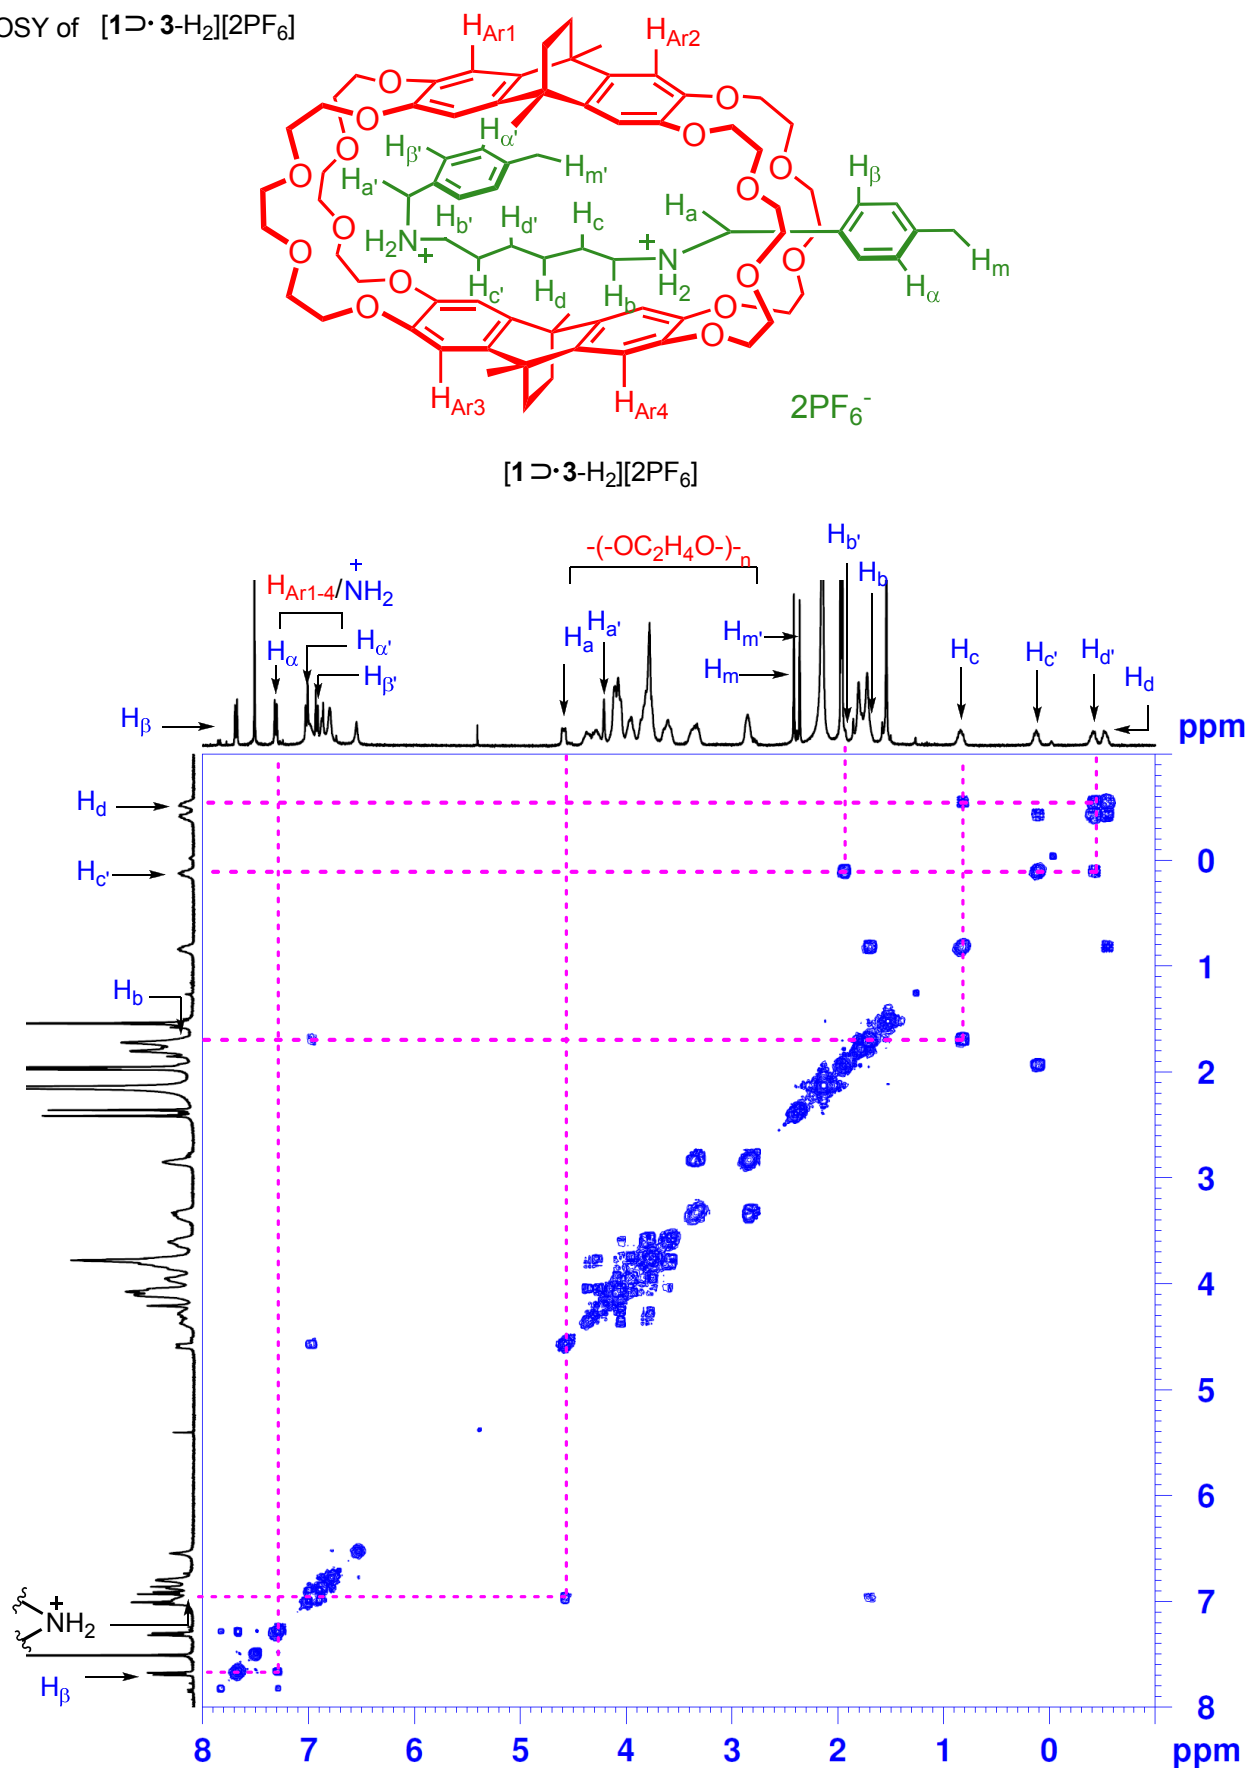

Figure S4. COSY spectrum [400 MHz,  $\text{CDCl}_3/\text{CD}_3\text{CN}$  (1:1), 298 K] of the complex  $[1 \supset 3\text{-H}_2][2\text{PF}_6]$ , recorded after mixing the molecular cage **1** and the threadlike salt  $[3\text{-H}_2][2\text{PF}_6]$  at 298 K for 3.3 days.

Figure S5  
NOESY of  $[1 \supset 3\text{-H}_2][2\text{PF}_6]$

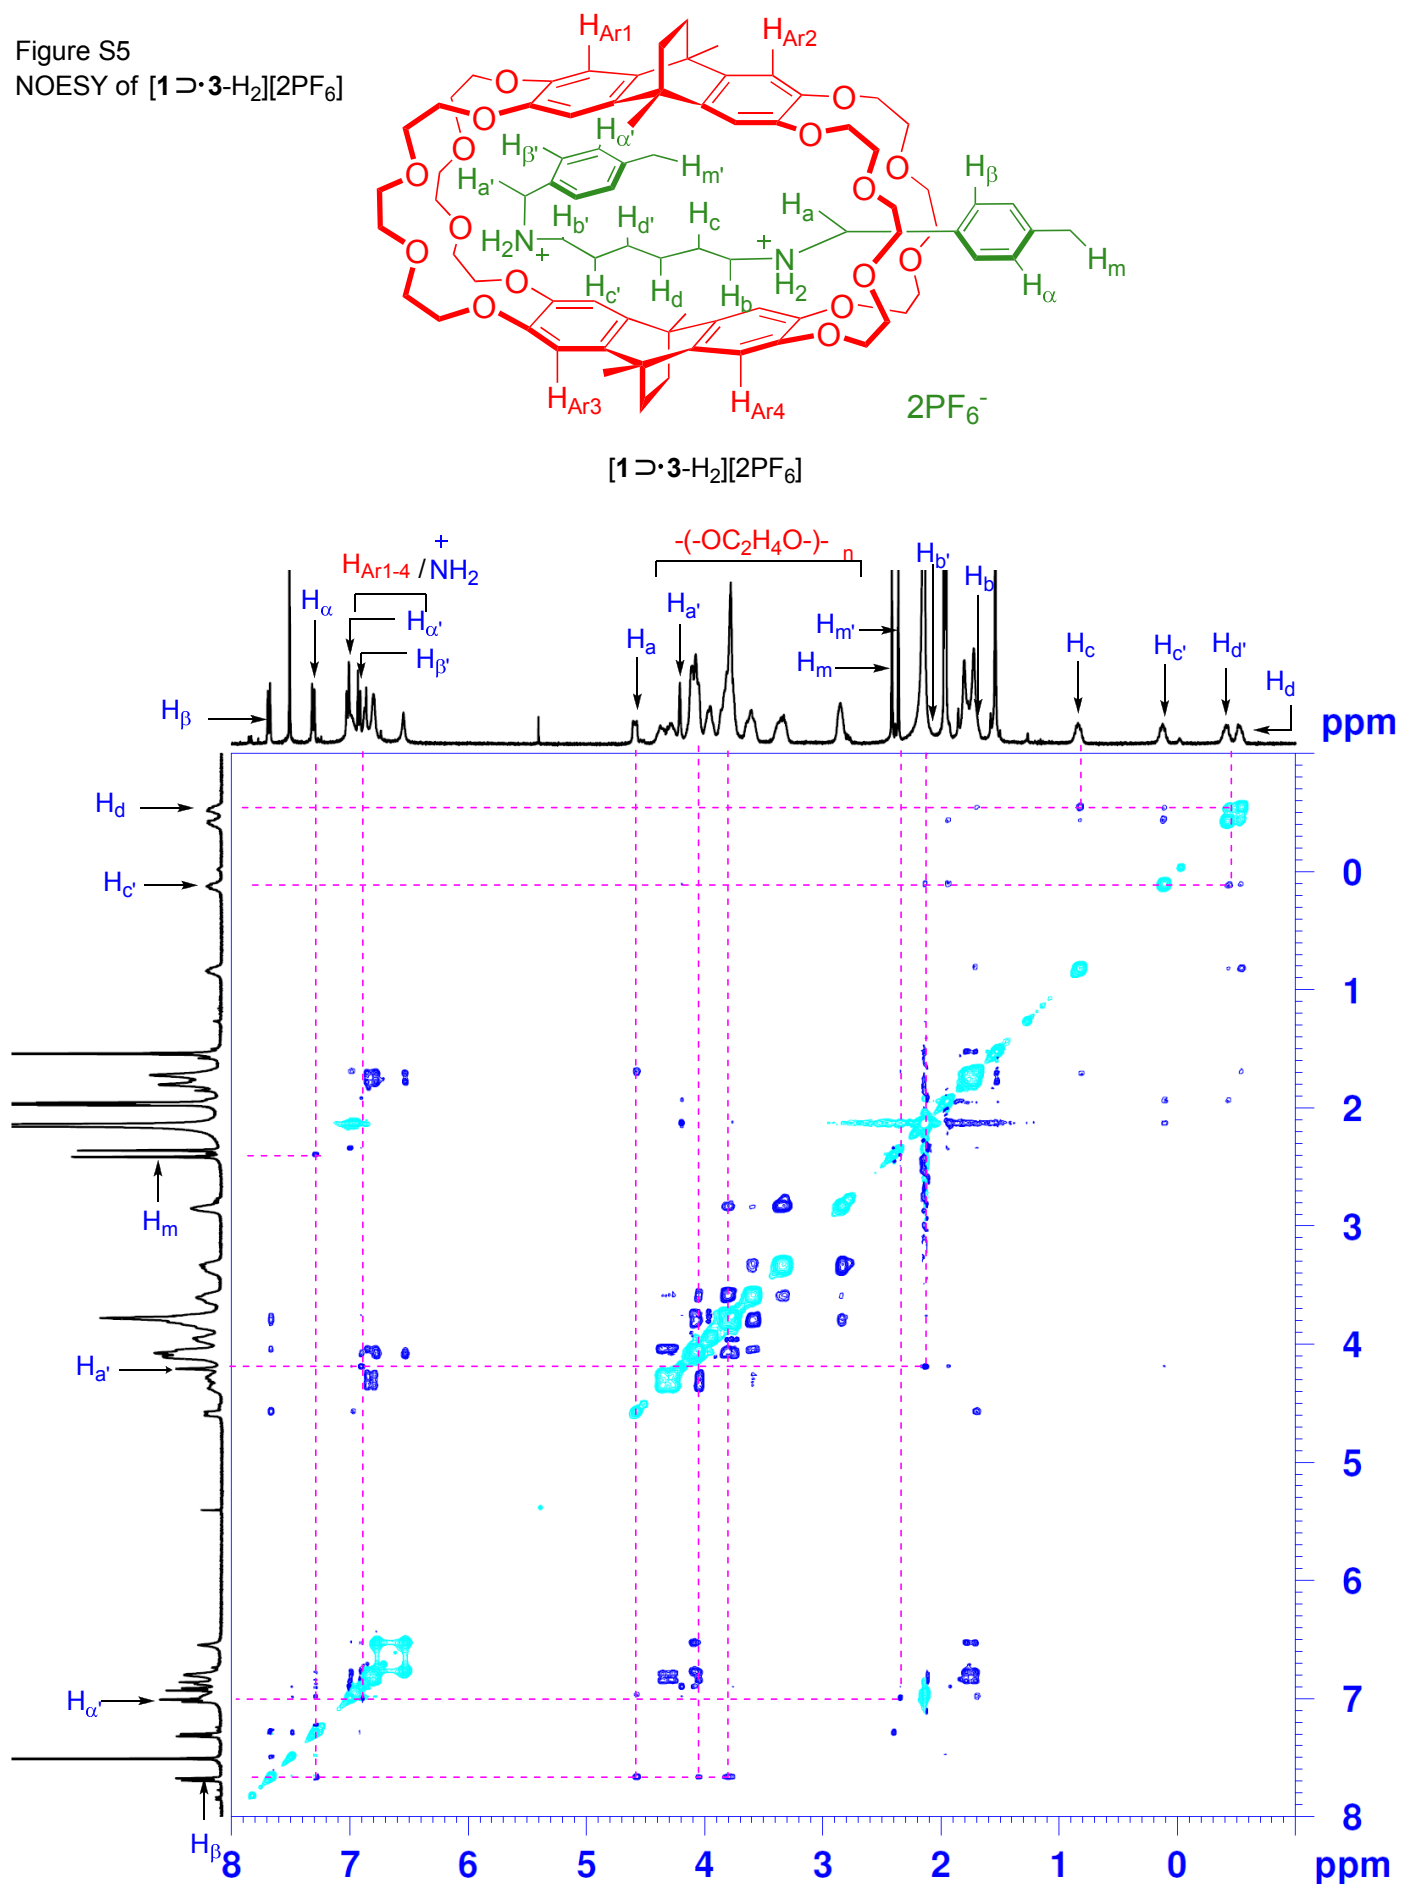

Figure S5. NOESY spectrum [400 MHz,  $\text{CDCl}_3/\text{CD}_3\text{CN}$  (1:1), 298 K] of the complex  $[1 \supset 3\text{-H}_2][2\text{PF}_6]$ , recorded after mixing the molecular cage **1** and the threadlike salt  $[3\text{-H}_2][2\text{PF}_6]$  at 298 K for 3.3 days.



## Assignment of Signals in $^1\text{H}$ NMR Spectra of the Complex [1 $\rightarrow$ 3- $\text{H}_2$ ][2PF $_6$ ] Based on Its 2D COSY and NOESY Spectra

### From NOESY

$\text{H}_a$  ( $\delta = 4.56$ )  $\rightarrow$   $\text{H}_\beta$  ( $\delta = 7.66$ )  $\rightarrow$   $\text{H}_\alpha$  ( $\delta = 7.28$ ) and  $-(\text{OCH}_2\text{CH}_2\text{O})-$  [protons of the tri(ethylene glycol) chains of host **1**;  $\delta = 3.51$ – $4.42$ , overlapped with  $\text{H}_a$ ]

$\text{H}_\alpha$  ( $\delta = 7.28$ )  $\rightarrow$   $\text{H}_m$  ( $\delta = 2.39$ ); (so  $\text{H}_m$  was known)

$\text{H}_a$  was the characteristic signal for benzylic protons adjacent to an  $^+\text{NH}_2$  center threaded through the cavity of DB24C8.

### From COSY

$\text{H}_a$  ( $\delta = 4.56$ , t,  $J = 7$  Hz, 2H)  $\rightarrow$   $^+\text{NH}_2$  ( $\delta = 6.74$ – $7.03$ ; overlapped with  $\text{H}_{\alpha'}$ ,  $\text{H}_{\beta'}$ , and  $\text{H}_{\text{Ar}1-4}$ )

### From NOESY

$\text{H}_m$  ( $\delta = 2.31$ )  $\rightarrow$   $\text{H}_{\alpha'}$  ( $\delta = 6.99$ )

### From COSY

$\text{H}_{\alpha'}$  ( $\delta = 6.99$ )  $\rightarrow$   $\text{H}_{\beta'}$  ( $\delta = 6.89$ )

### From NOESY

$\text{H}_{\beta'}$  ( $\delta = 6.89$ )  $\rightarrow$   $\text{H}_a$  ( $\delta = 4.56$ )  $\rightarrow$   $\text{H}_b$  ( $\delta = 2.04$ – $2.22$ , overlapped with signal for water)

$\text{H}_{\alpha'}$  and  $\text{H}_{\beta'}$  were shielded strongly by the aromatic moiety of the molecular cage and shifted upfield significantly.

### From COSY

$\text{H}_b$  ( $\delta = 2.04$ – $2.22$ , overlapped with signal for water)  $\rightarrow$   $\text{H}_c$  ( $\delta = 0.75$ – $0.88$ )  $\rightarrow$   $\text{H}_d$  ( $\delta = -0.50$  to  $-0.36$ )  $\rightarrow$   $\text{H}_d$  ( $\delta = -0.63$  to  $-0.50$ )  $\rightarrow$   $\text{H}_c$  ( $\delta = 1.49$ – $1.55$ )  $\rightarrow$   $\text{H}_b$  ( $\delta = 1.64$ – $1.81$ ; overlapped with the signals for the aliphatic protons of the molecular cage)

Figure S6  
COSY of  $[1 \supset \cdot 4\text{-H}_2][2\text{PF}_6]$

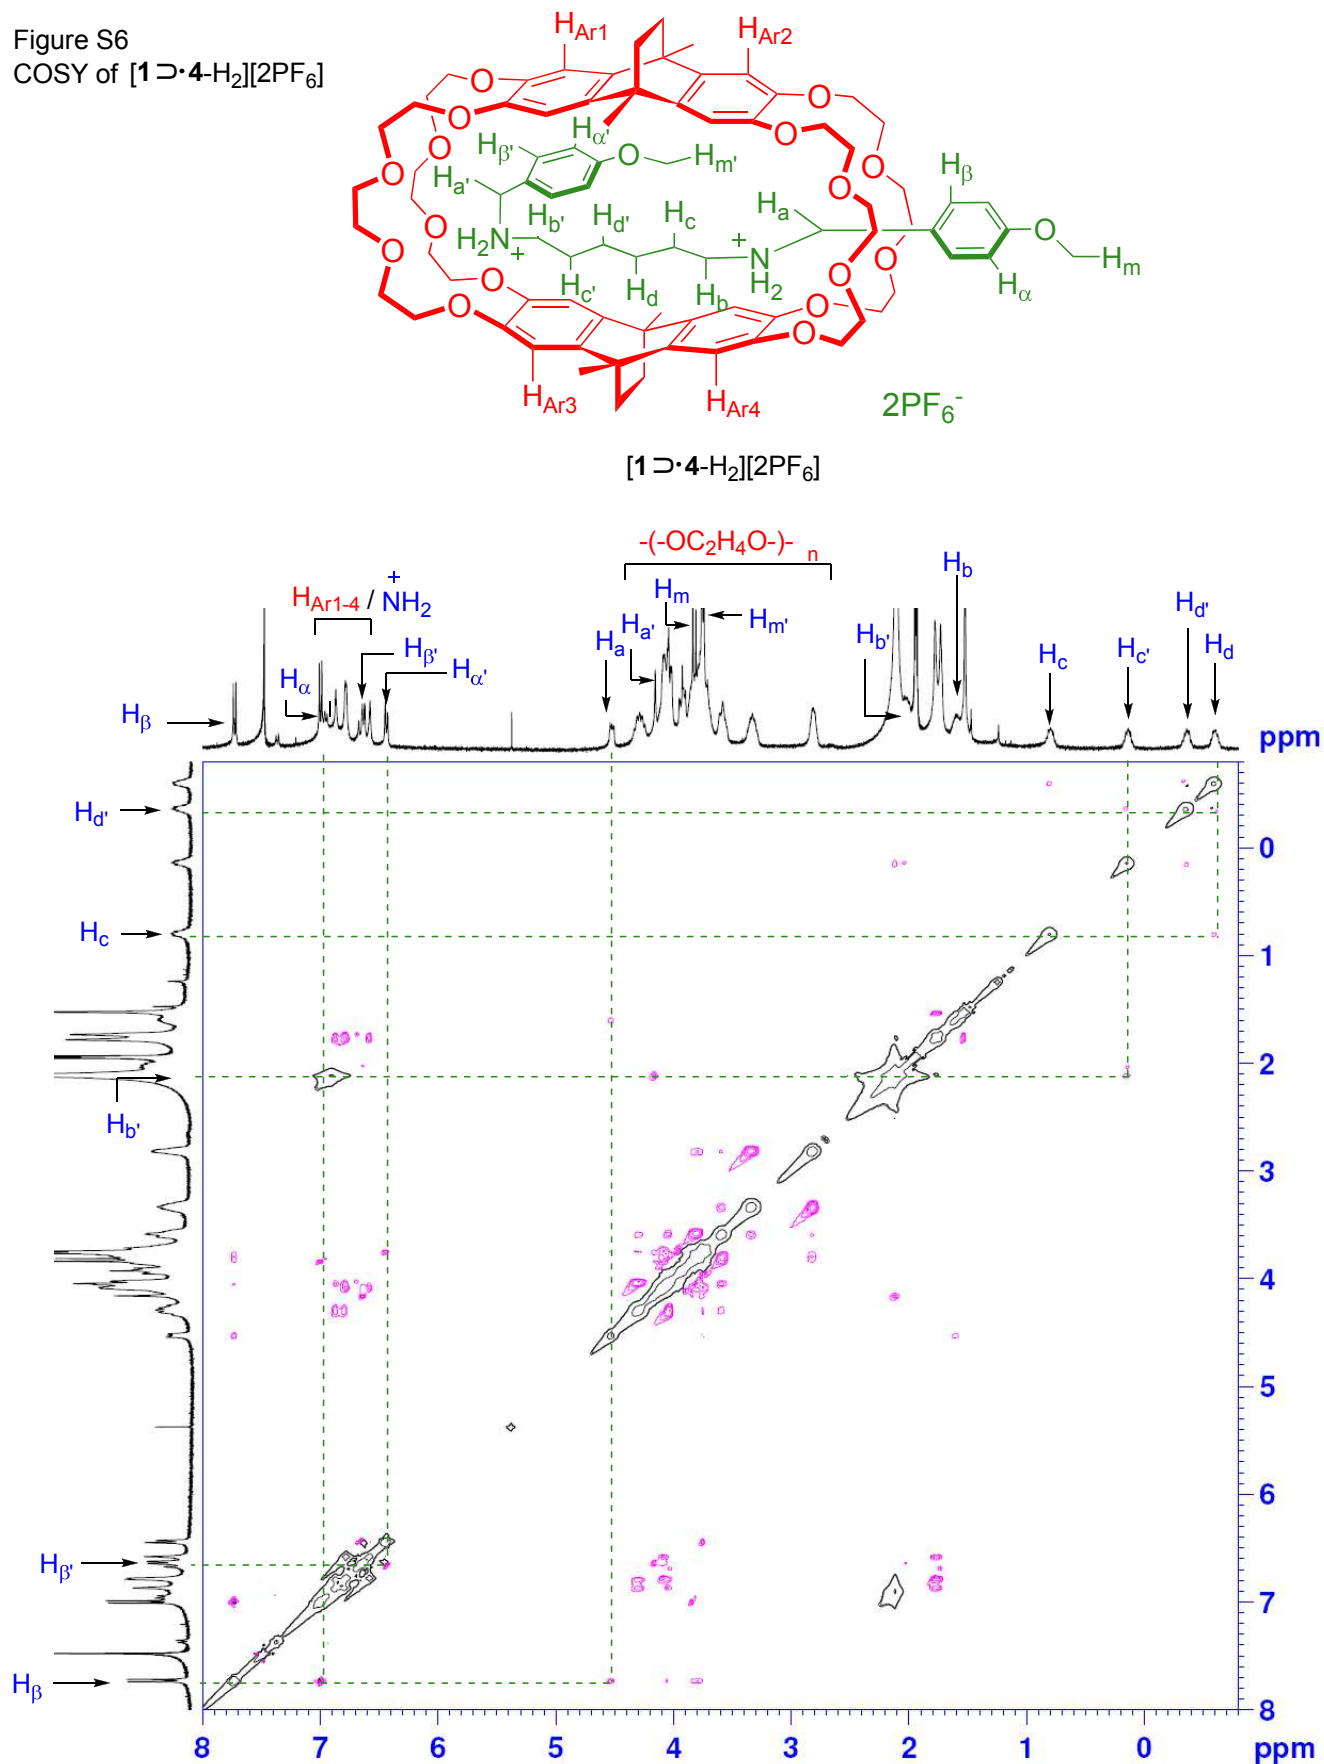

Figure S6. COSY spectrum [400 MHz, CDCl<sub>3</sub>/CD<sub>3</sub>CN (1:1), 298 K] of the complex  $[1 \supset \cdot 4\text{-H}_2][2\text{PF}_6]$ , recorded after mixing the molecular cage **1** and the threadlike salt  $[4\text{-H}_2][2\text{PF}_6]$  at 298 K for 2.4 days.

Figure S7

NOESY of  $[1\text{D}\cdot 4\text{-H}_2][2\text{PF}_6]$

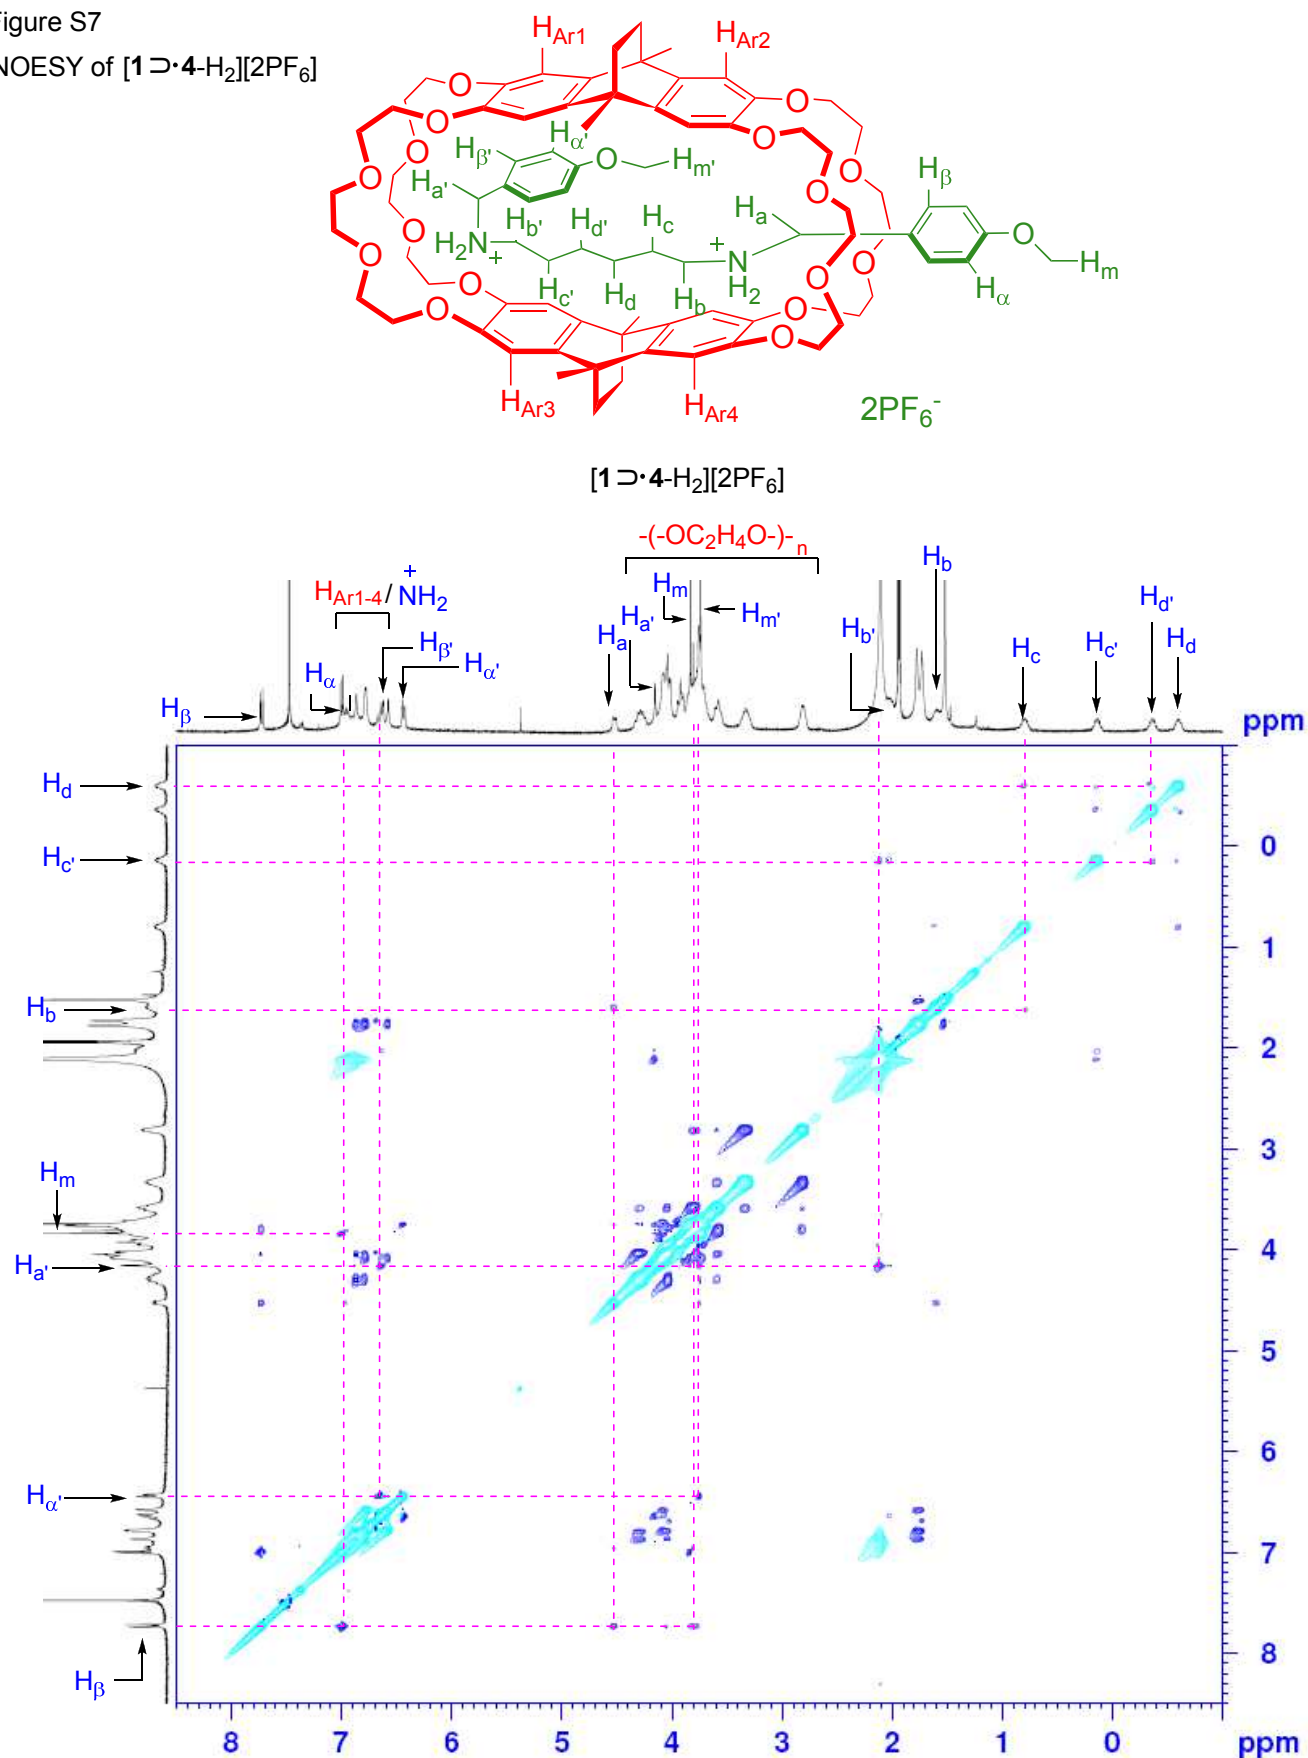

Figure S7. NOESY spectrum [400 MHz, CDCl<sub>3</sub>/CD<sub>3</sub>CN (1:1), 298 K] of the complex  $[1\text{D}\cdot 4\text{-H}_2][2\text{PF}_6]$ , recorded after mixing the molecular cage **1** and the threadlike salt  $[4\text{-H}_2][2\text{PF}_6]$  at 298 K for 2.4 days.

## Assignment of Signals in $^1\text{H}$ NMR Spectra of the Complex [1 $\rightarrow$ 4- $\text{H}_2$ ][2 $\text{PF}_6$ ] Based on Its 2D COSY and NOESY Spectra

### From NOESY

$\text{H}_\alpha$  ( $\delta = 4.52$ )  $\rightarrow$   $\text{H}_\beta$  ( $\delta = 7.73$ )  $\rightarrow$   $\text{H}_\alpha$  ( $\delta = 7.00$ ), and  $-(\text{OCH}_2\text{CH}_2\text{O})-$  [protons of the tri(ethylene glycol) chains of host **1**;  $\delta = 3.50$ – $4.40$ ]

$\text{H}_\alpha$  ( $\delta = 7.00$ )  $\rightarrow$   $\text{H}_m$  ( $\delta = 3.84$ )

$\text{H}_\alpha$  ( $\delta = 4.52$ , t,  $J = 7$  Hz, 2H)  $\rightarrow$   $\text{H}_b$  ( $\delta = 1.57$ – $1.66$ )  $\rightarrow$   $\text{H}_c$  ( $\delta = 0.73$ – $0.88$ )

$\text{H}_\alpha$  was the characteristic signal for benzylic protons adjacent to an  $^+\text{NH}_2$  center threaded through the cavity of DB24C8.

### From COSY

$\text{H}_c$  ( $\delta = 0.73$ – $0.88$ )  $\rightarrow$   $\text{H}_d$  ( $\delta = -0.67$  to  $-0.52$ )  $\rightarrow$   $\text{H}_d'$  ( $\delta = -0.43$  to  $-0.26$ )  $\rightarrow$   $\text{H}_c'$  ( $\delta = 0.07$ – $0.23$ )  $\rightarrow$   $\text{H}_b'$  ( $\delta = 1.99$ – $2.06$ )

### From NOESY

$\text{H}_b'$  ( $\delta = 1.99$ – $2.06$ )  $\rightarrow$   $\text{H}_\alpha'$  ( $\delta = 4.16$ )  $\rightarrow$   $\text{H}_\beta'$  ( $\delta = 6.63$ )

### From COSY

$\text{H}_\beta'$  ( $\delta = 6.63$ )  $\rightarrow$   $\text{H}_\alpha'$  ( $\delta = 6.44$ )

$\text{H}_\alpha'$  and  $\text{H}_\beta'$  were shielded strongly by the aromatic moiety of the molecular cage and shifted upfield significantly.

### From NOESY

$\text{H}_\alpha'$  ( $\delta = 6.44$ , d,  $J = 9$  Hz, 2H)  $\rightarrow$   $\text{H}_m'$  ( $\delta = 3.74$ )

$\text{H}_m'$  was shielded by the aromatic moiety of the molecular cage and shifted upfield to a greater extent than was  $\text{H}_m$ ).

Figure S8  
COSY of  $[1 \cdot 6-H_2][2PF_6]$

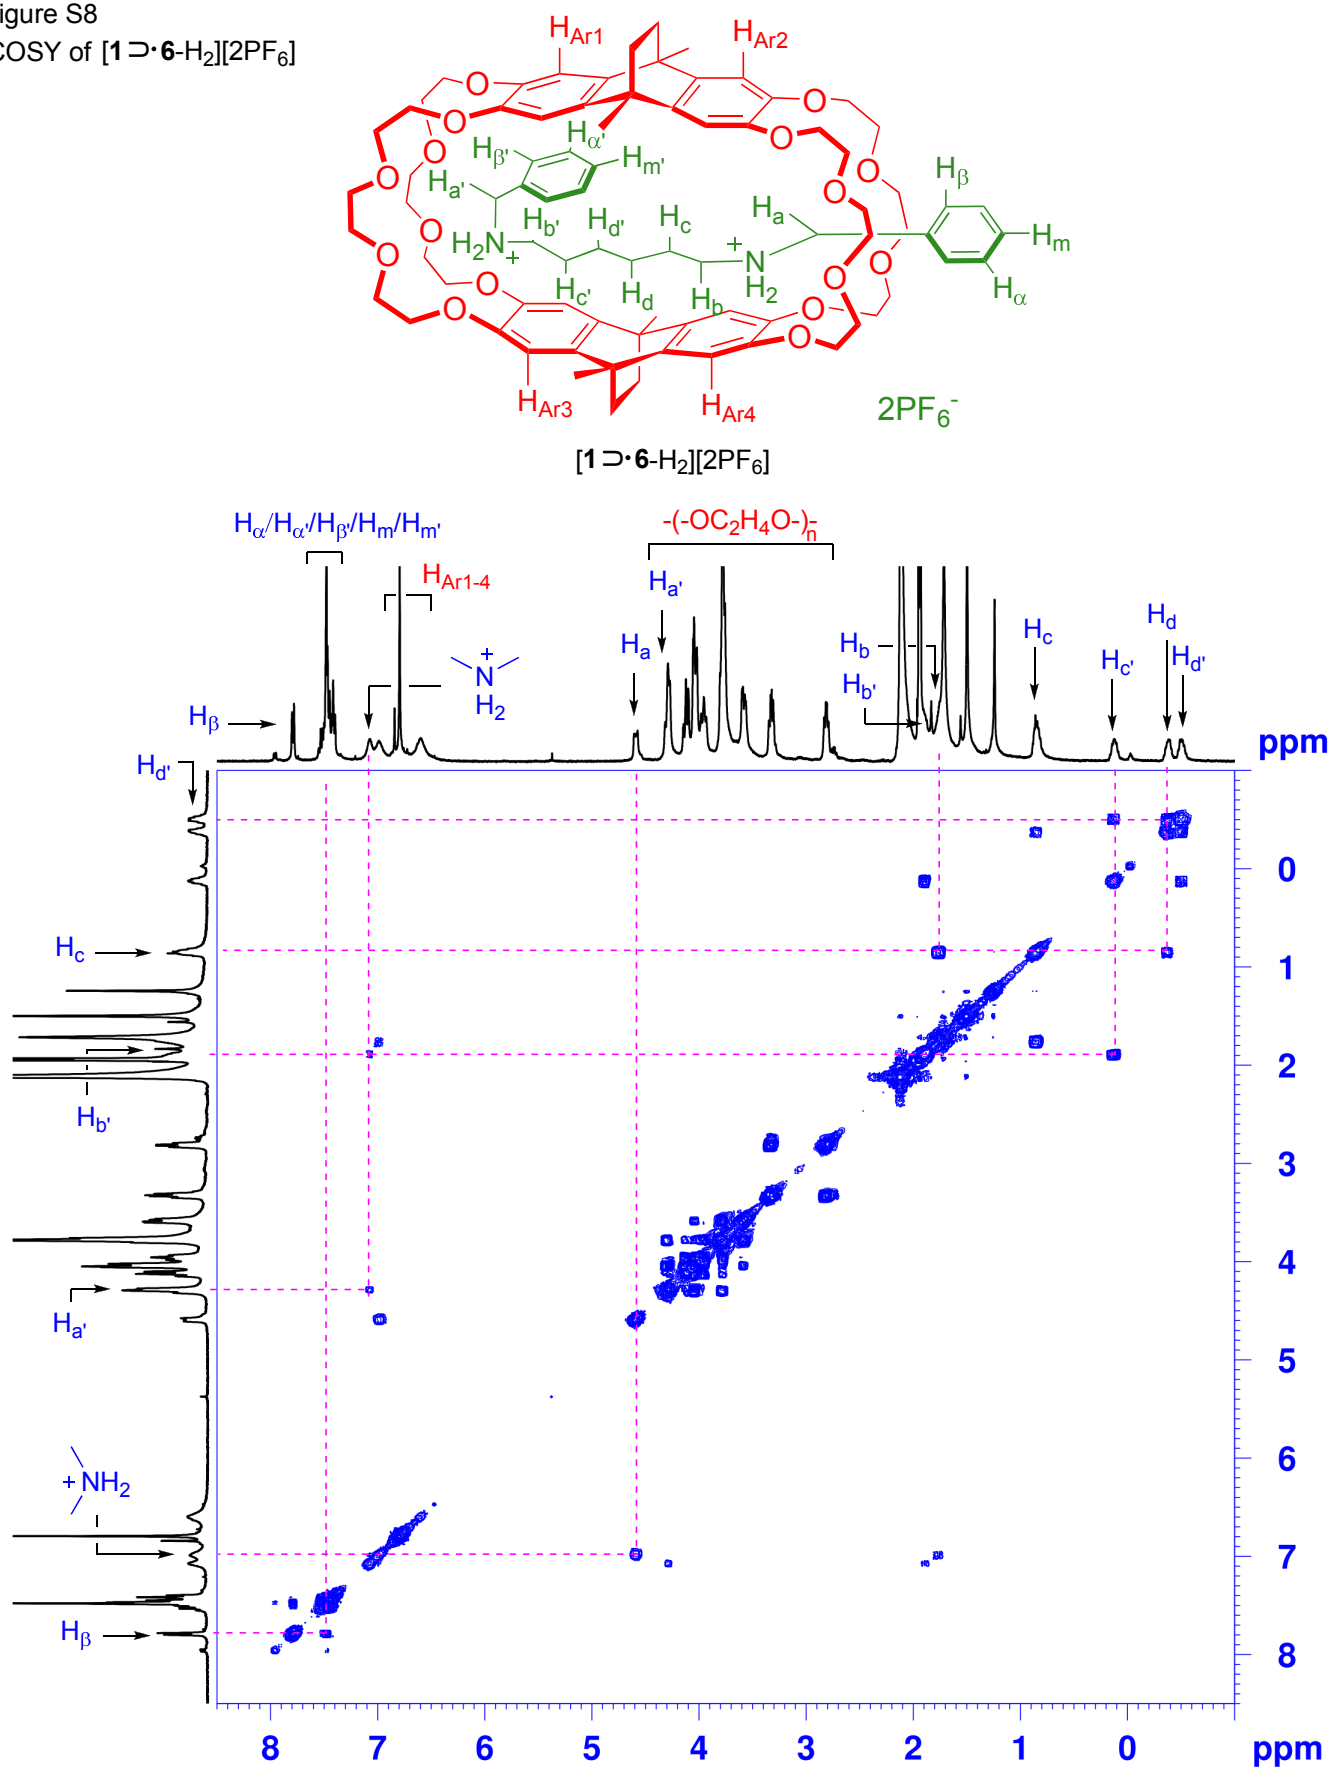

Figure S8. COSY spectrum [400 MHz,  $CDCl_3/CD_3CN$  (1:1), 298 K] of the complex  $[1 \cdot 6-H_2][2PF_6]$ , recorded after mixing the molecular cage **1** and the threadlike salt  $[6-H_2][2PF_6]$  at 298 K for 8 h.

Figure S9  
NOESY of  $[1 \cdot 6-H_2][2PF_6]$

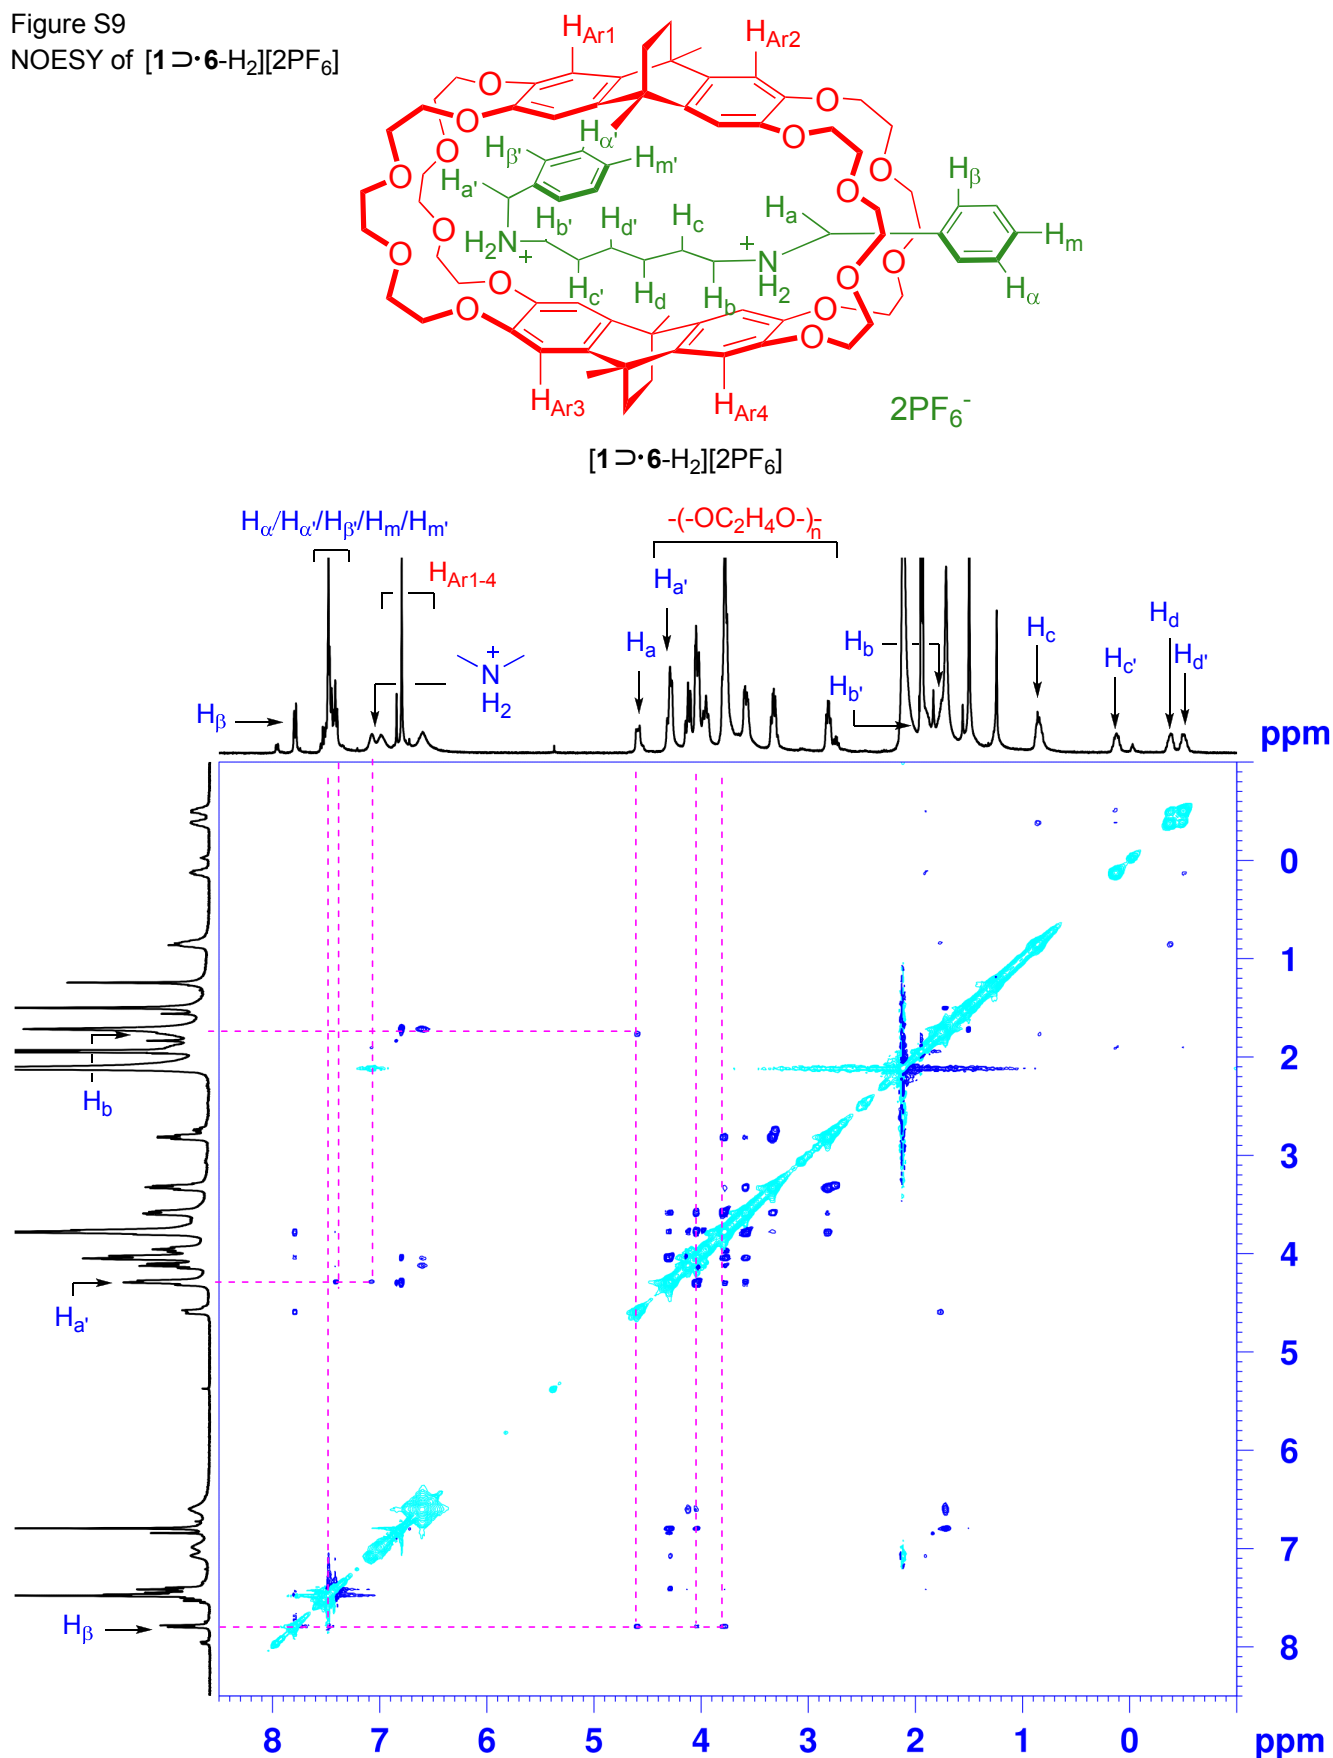

Figure S9. NOESY spectrum [400 MHz,  $CDCl_3/CD_3CN$  (1:1), 298 K] of the complex  $[1 \cdot 6-H_2][2PF_6]$ , recorded after mixing the molecular cage **1** and the threadlike salt  $[6-H_2][2PF_6]$  at 298 K for 8 h.

## Assignment of Signals in $^1\text{H}$ NMR Spectra of the Complex [**1**⊃**6**- $\text{H}_2$ ][ $2\text{PF}_6$ ] Based on Its 2D COSY and NOESY Spectra

### From NOESY

$\text{H}_a$  ( $\delta = 4.59$ )  $\rightarrow$   $\text{H}_\beta$  ( $\delta = 7.79$ )  $\rightarrow$   $\text{H}_\alpha$  ( $\delta = 7.32$ – $7.58$ , overlapped with  $\text{H}_{\alpha'}$ ,  $\text{H}_{\beta'}$ ,  $\text{H}_m$ , and  $\text{H}_{m'}$ ) and  $-(\text{OCH}_2\text{CH}_2\text{O})-$  [protons of the tri(ethylene glycol) chains of host **1**;  $\delta = 3.40$ – $4.19$ ]

$\text{H}_a$  ( $\delta = 4.59$ )  $\rightarrow$   $\text{H}_b$  ( $\delta = 1.75$ – $1.81$ ; overlapped with the aliphatic signals of the molecular cage **1**)

$\text{H}_a$  was the characteristic signal for benzylic protons adjacent to an  $^+\text{NH}_2$  center threaded through the cavity of DB24C8.

### From COSY

$\text{H}_b$  ( $\delta = 1.75$ – $1.81$ , overlapped with the aliphatic signals of the molecular cage **1**)  $\rightarrow$   $\text{H}_c$  ( $\delta = 0.73$ – $0.92$ )  $\rightarrow$   $\text{H}_d$  ( $\delta = -0.44$  to  $-0.32$ )  $\rightarrow$   $\text{H}_{d'}$  ( $\delta = -0.58$  to  $-0.44$ )  $\rightarrow$   $\text{H}_c'$  ( $\delta = 0.07$ – $0.20$ )  $\rightarrow$   $\text{H}_{b'}$  ( $\delta = 1.86$ – $1.92$ , overlapped with the aliphatic signals of the molecular cage **1**)

### From NOESY

$\text{H}_{b'}$  ( $\delta = 1.86$ – $1.92$ )  $\rightarrow$   $^+\text{NH}_2$  ( $\delta = 6.43$ – $6.69$ )  $\rightarrow$   $\text{H}_{a'}$  [ $\delta = 4.55$ – $4.65$ , overlapped with the tri(ethylene glycol) signals of the molecular cage **1**]  $\rightarrow$   $\text{H}_{\beta'}$  ( $\delta = 7.32$ – $7.58$ , overlapped with  $\text{H}_\alpha$ ,  $\text{H}_{\alpha'}$ ,  $\text{H}_m$ , and  $\text{H}_{m'}$ )

$\text{H}_{\alpha'}$  and  $\text{H}_{\beta'}$  were shielded by the aromatic moiety of the molecular cage and shifted upfield.

**Table S1.** Kinetic data for threading of the face-to-face-complexed aromatic termini of [1⊃x-H<sub>2</sub>][2PF<sub>6</sub>] into the DB24C8-like opening of the molecular cage **1** to form completely threaded complexes [1⊃x-H<sub>2</sub>][2PF<sub>6</sub>]

| Complex formed <sup>[a]</sup>            | Terminal substituent | <i>k</i> (s <sup>-1</sup> ) <sup>[b,c]</sup> | Δ <i>G</i> <sup>‡</sup> <sup>[c,d]</sup> (kcal mol <sup>-1</sup> ) | Δ <i>H</i> <sup>‡</sup> <sup>[e]</sup> (kcal mol <sup>-1</sup> ) | Δ <i>S</i> <sup>‡</sup> <sup>[e]</sup> (cal mol <sup>-1</sup> K <sup>-1</sup> ) |
|------------------------------------------|----------------------|----------------------------------------------|--------------------------------------------------------------------|------------------------------------------------------------------|---------------------------------------------------------------------------------|
| [1⊃2-H <sub>2</sub> ][2PF <sub>6</sub> ] | Br                   | (2.2 ± 0.2) × 10 <sup>-7</sup>               | 26.5 ± 0.1                                                         | 11.4 ± 6.1                                                       | -50.2 ± 19.6                                                                    |
| [1⊃3-H <sub>2</sub> ][2PF <sub>6</sub> ] | CH <sub>3</sub>      | (8.6 ± 0.9) × 10 <sup>-8</sup>               | 27.1 ± 0.1                                                         | 19.7 ± 0.8                                                       | -24.6 ± 2.6                                                                     |
| [1⊃4-H <sub>2</sub> ][2PF <sub>6</sub> ] | OCH <sub>3</sub>     | (1.4 ± 0.1) × 10 <sup>-7</sup>               | 26.8 ± 0.1                                                         | 18.3 ± 1.9                                                       | -28.6 ± 6.1                                                                     |
| [1⊃5-H <sub>2</sub> ][2PF <sub>6</sub> ] | F                    | (6.2 ± 0.9) × 10 <sup>-6</sup>               | 24.5 ± 0.1                                                         | 9.2 ± 3.9                                                        | -51.6 ± 12.6                                                                    |
| [1⊃6-H <sub>2</sub> ][2PF <sub>6</sub> ] | H                    | (1.7 ± 0.3) × 10 <sup>-6</sup>               | 25.3 ± 0.1                                                         | 20.3 ± 1.2                                                       | -16.6 ± 3.8                                                                     |

[a] Experiments were performed using an equimolar mixture (4.00 mM) of the molecular cage **1** and the threadlike salt. The 90% confidence limits for *k*, Δ*G*<sup>‡</sup>, Δ*H*<sup>‡</sup> and Δ*S*<sup>‡</sup> were evaluated by the least-squares method. [b] Value of *k* were obtained either from the slope of the straight line in the plot of ln([A<sub>0</sub>]/[A<sub>t</sub>]) against *t* {using the relationship of ln([A<sub>0</sub>]/[A<sub>t</sub>]) = *kt*}. [c] Calculated at 298 K. [d] Value of Δ*G*<sup>‡</sup> were calculated using the relationship Δ*G*<sup>‡</sup> = -*RT* ln(*kh*/*k<sub>B</sub>T*), where *R*, *h*, and *k<sub>B</sub>* correspond to the gas, Plank, and Boltzmann constants, respectively. [e] Value of Δ*H*<sup>‡</sup> and Δ*S*<sup>‡</sup> were obtained from the intercept and slope of the straight line in the plot of Δ*G*<sup>‡</sup> against *T* (using the relationship Δ*G*<sup>‡</sup> = Δ*H*<sup>‡</sup> - *T*Δ*S*<sup>‡</sup>).

Experiments were performed using an equimolar (4 mM) mixture of molecular cage **1** and the threadlike salt in CDCl<sub>3</sub><sup>[S-a]</sup> / CD<sub>3</sub>CN (1:1). The rate constant (*k*) for the threading process were determined from the slope of the straight line in the plot of ln([A<sub>0</sub>]/[A<sub>t</sub>]) against *t*, measured at five temperatures. The value of [A<sub>0</sub>] = [A<sub>t</sub>] + [P<sub>t</sub>] and [A<sub>t</sub>] were determined from the reciprocal of the molar ratio of the face-to-face complex to the completely threaded pseudorotaxane in the solution, measured from the integrated signals in <sup>1</sup>H NMR spectra: [1/4 integral of H<sub>β'</sub> (4H) + 1/2 integral of H<sub>β</sub> (2H)] / [1/2 integral of H<sub>β</sub> (2H)]. The value of Δ*G*<sup>‡</sup> (kcal mol<sup>-1</sup>) were calculated using the relationship

$$\Delta G^{\ddagger} = -RT \ln(kh/k_B T)$$

where *R*, *h* and *k<sub>B</sub>* correspond to the gas, Plank and Boltzmann constants, respectively. The value of Δ*H*<sup>‡</sup> (kcal mol<sup>-1</sup>) and Δ*S*<sup>‡</sup> (cal mol<sup>-1</sup>) were obtained from the intercept and slope, respectively, of the straight lines in the plots of Δ*G*<sup>‡</sup> against *T*, using the relationship

$$\Delta G^{\ddagger} = \Delta H^{\ddagger} - T\Delta S^{\ddagger}$$

[S-a] To avoid possible disruptive effects caused by Cl<sup>-</sup> anion or by the decomposition of PF<sub>6</sub><sup>-</sup> into PF<sub>5</sub> and F<sup>-</sup> in CDCl<sub>3</sub>, the deuterated solvent used in kinetic experiments was treated with K<sub>2</sub>CO<sub>3</sub> and Na<sub>2</sub>S<sub>2</sub>O<sub>3</sub> and distilled prior to performing these studies.



X = Br and [1⇌2-H<sub>2</sub>][2PF<sub>6</sub>] was the product formed.

In these experiments, [A<sub>t</sub>] and [P<sub>t</sub>] were determined by integration of the signals at δ 7.73 (d, J = 8 Hz, 2H) and δ 7.86 (d, J = 5 Hz, 4H), respectively.

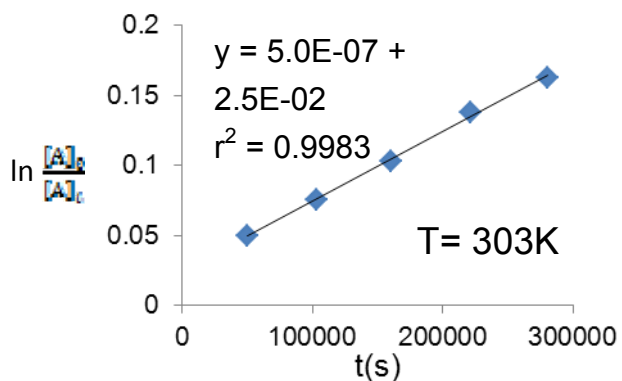

$k = (5.0 \pm 0.3) \times 10^{-7} \text{ (s}^{-1}\text{)}, \Delta G^\ddagger = 26.5 \pm 0.1 \text{ (kcal mol}^{-1}\text{)}$

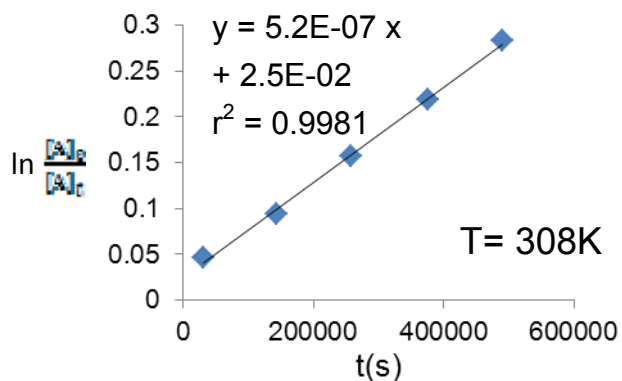

$k = (5.2 \pm 0.4) \times 10^{-7} \text{ (s}^{-1}\text{)}, \Delta G^\ddagger = 26.9 \pm 0.1 \text{ (kcal mol}^{-1}\text{)}$

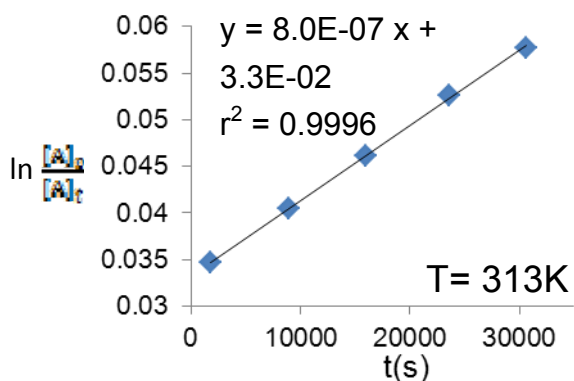

$k = (8.0 \pm 0.3) \times 10^{-7} \text{ (s}^{-1}\text{)}, \Delta G^\ddagger = 27.1 \pm 0.1 \text{ (kcal mol}^{-1}\text{)}$

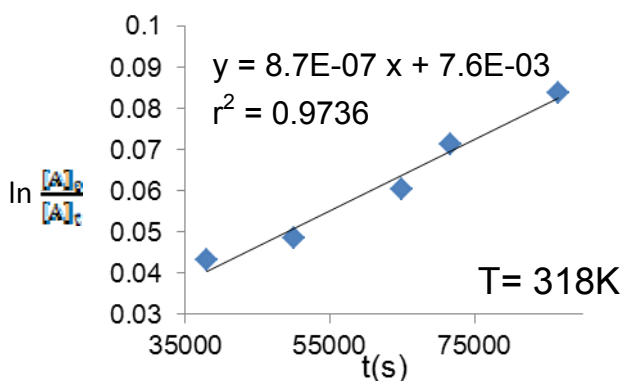

$k = (8.7 \pm 2.0) \times 10^{-7} \text{ (s}^{-1}\text{)}, \Delta G^\ddagger = 27.5 \pm 0.1 \text{ (kcal mol}^{-1}\text{)}$

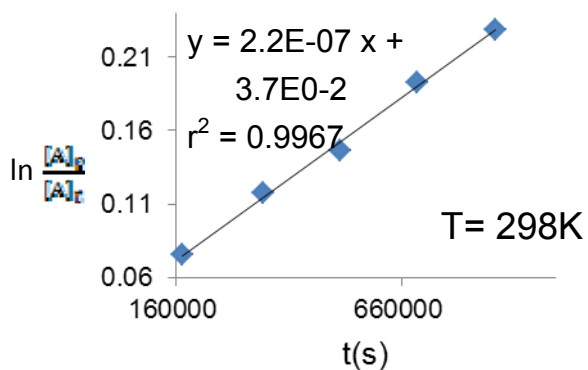

$k = (2.2 \pm 0.2) \times 10^{-7} \text{ (s}^{-1}\text{)}, \Delta G^\ddagger = 26.5 \pm 0.1 \text{ (kcal mol}^{-1}\text{)}$

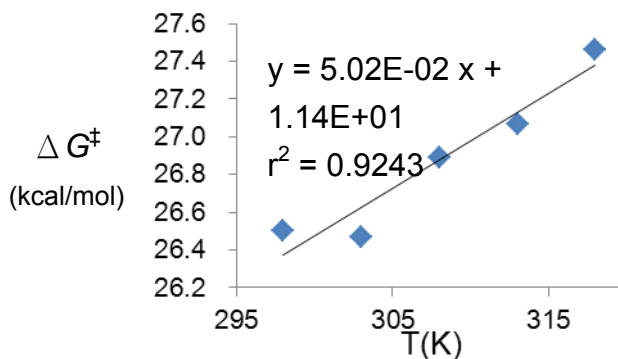

$\Delta H^\ddagger = \text{intercept} = 11.4 \pm 6.1 \text{ (kcal mol}^{-1}\text{)},$   
 $\Delta S^\ddagger = -\text{slope} = -50.2 \pm 19.6 \text{ (cal mol}^{-1} \text{K}^{-1}\text{)}$

X = CH<sub>3</sub> and [1→3-H<sub>2</sub>][2PF<sub>6</sub>] was the product formed.

In these experiments, [A<sub>t</sub>] and [P<sub>t</sub>] were determined by integration of the signals at δ 7.64 (d, J = 8 Hz, 2H) and δ 7.81 (d, J = 8 Hz, 4H), respectively.

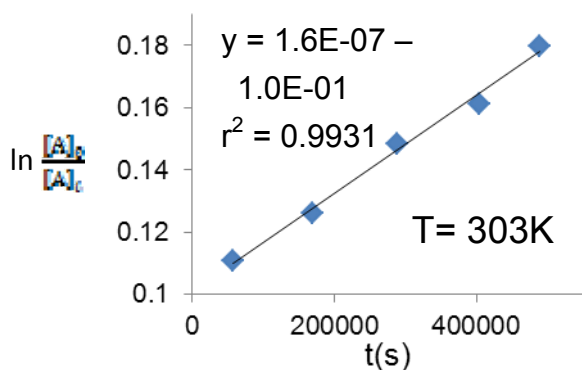

$k = (1.6 \pm 0.2) \times 10^{-7} \text{ (s}^{-1}\text{)}, \Delta G^\ddagger = 27.2 \pm 0.1 \text{ (kcal mol}^{-1}\text{)}$

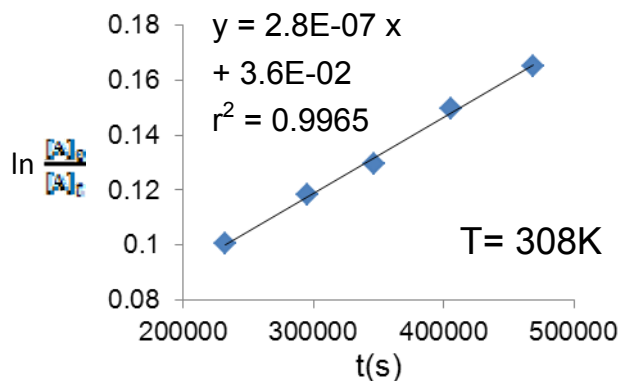

$k = (2.8 \pm 0.3) \times 10^{-7} \text{ (s}^{-1}\text{)}, \Delta G^\ddagger = 27.3 \pm 0.1 \text{ (kcal mol}^{-1}\text{)}$

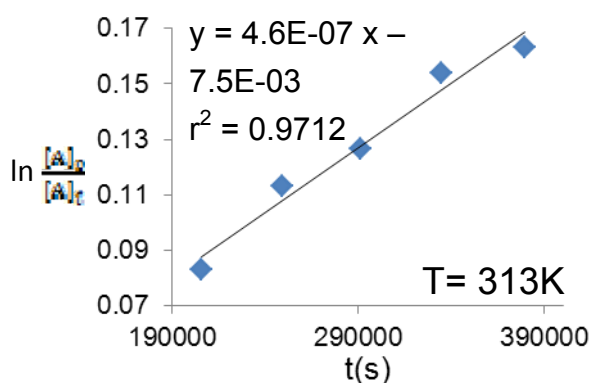

$k = (4.6 \pm 1.1) \times 10^{-7} \text{ (s}^{-1}\text{)}, \Delta G^\ddagger = 27.4 \pm 0.1 \text{ (kcal mol}^{-1}\text{)}$

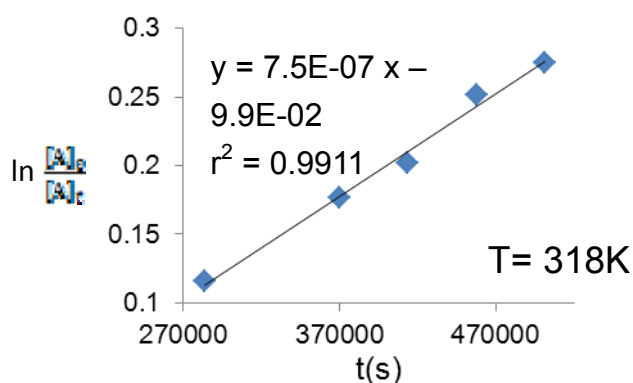

$k = (7.5 \pm 1.0) \times 10^{-7} \text{ (s}^{-1}\text{)}, \Delta G^\ddagger = 27.6 \pm 0.1 \text{ (kcal mol}^{-1}\text{)}$

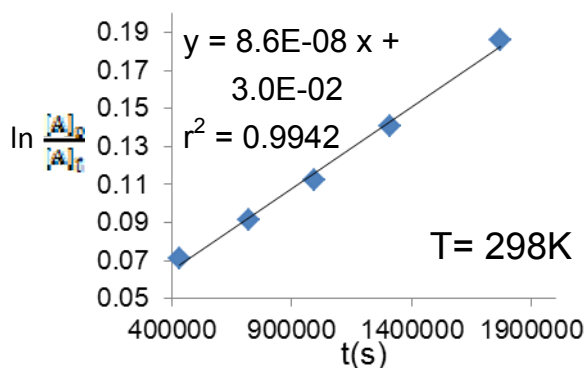

$k = (8.6 \pm 0.9) \times 10^{-8} \text{ (s}^{-1}\text{)}, \Delta G^\ddagger = 27.1 \pm 0.1 \text{ (kcal mol}^{-1}\text{)}$

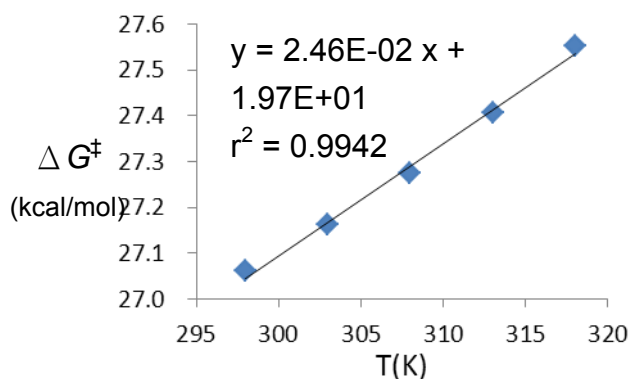

$\Delta H^\ddagger = \text{intercept} = 19.7 \pm 0.8 \text{ (kcal mol}^{-1}\text{)},$   
 $\Delta S^\ddagger = -\text{slope} = -24.6 \pm 2.6 \text{ (cal mol}^{-1} \text{K}^{-1}\text{)}$

X = OCH<sub>3</sub> and [1 $\Rightarrow$ 4-H<sub>2</sub>][2PF<sub>6</sub>] was the product formed.

In these experiments, [A<sub>t</sub>] and [P<sub>t</sub>] were determined by integration of the signals at  $\delta$  7.70 (d,  $J$  = 9 Hz, 2H) and  $\delta$  7.86 (d,  $J$  = 9 Hz, 4H), respectively.

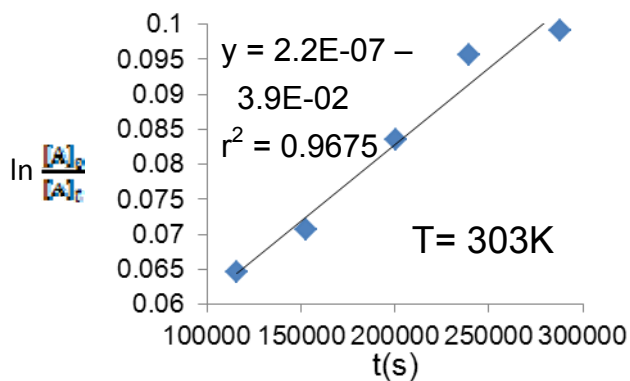

$k = (2.2 \pm 0.6) \times 10^{-7} \text{ (s}^{-1}\text{)}, \Delta G^\ddagger = 27.0 \pm 0.1 \text{ (kcal mol}^{-1}\text{)}$

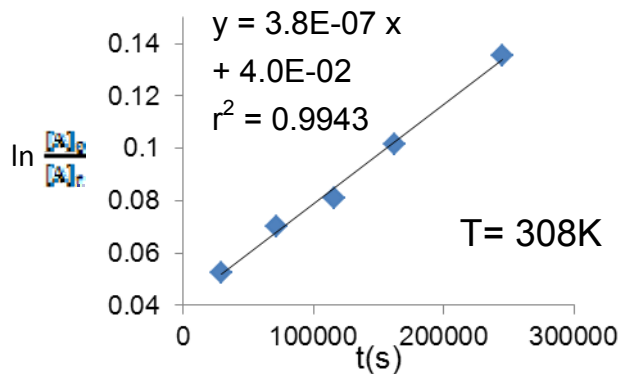

$k = (3.8 \pm 0.4) \times 10^{-7} \text{ (s}^{-1}\text{)}, \Delta G^\ddagger = 27.1 \pm 0.1 \text{ (kcal mol}^{-1}\text{)}$

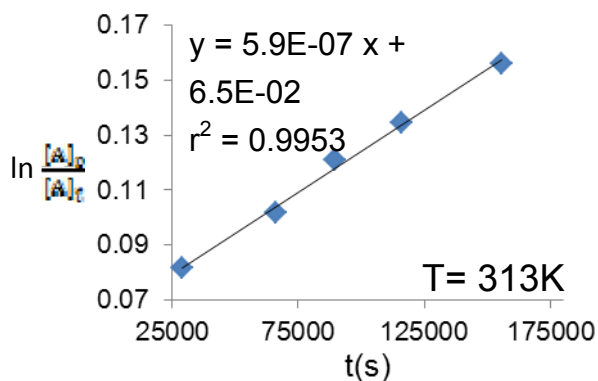

$k = (5.9 \pm 0.6) \times 10^{-7} \text{ (s}^{-1}\text{)}, \Delta G^\ddagger = 27.3 \pm 0.1 \text{ (kcal mol}^{-1}\text{)}$

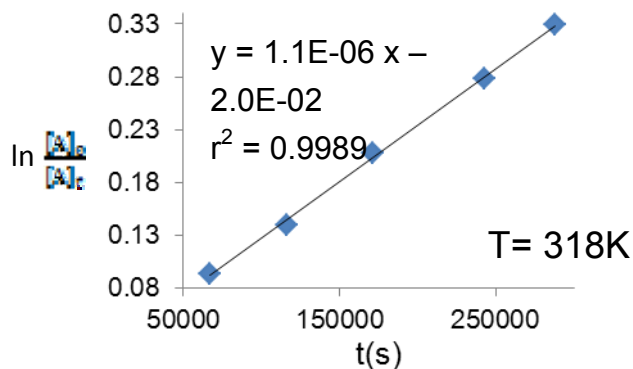

$k = (1.1 \pm 0.1) \times 10^{-6} \text{ (s}^{-1}\text{)}, \Delta G^\ddagger = 27.3 \pm 0.1 \text{ (kcal mol}^{-1}\text{)}$

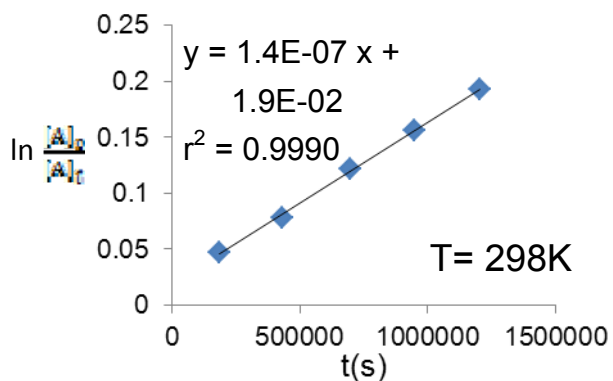

$k = (1.4 \pm 0.1) \times 10^{-7} \text{ (s}^{-1}\text{)}, \Delta G^\ddagger = 26.8 \pm 0.1 \text{ (kcal mol}^{-1}\text{)}$

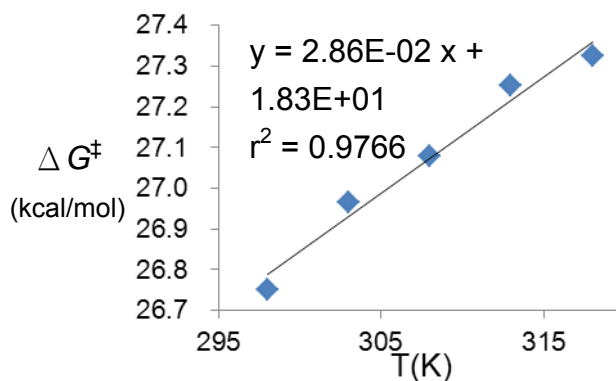

$\Delta H^\ddagger = \text{intercept} = 18.3 \pm 1.9 \text{ (kcal mol}^{-1}\text{)},$   
 $\Delta S^\ddagger = - \text{slope} = - 28.6 \pm 6.1 \text{ (cal mol}^{-1} \text{K}^{-1}\text{)}$

X = F and [1,5-H<sub>2</sub>][2PF<sub>6</sub>] was the product formed.

In these experiments, [A<sub>t</sub>] and [P<sub>t</sub>] were determined by integration of the signals at δ 7.82 (dd, J = 6, 8 Hz, 2H) and δ 7.96 (dd, J = 6, 8 Hz, 4H), respectively.

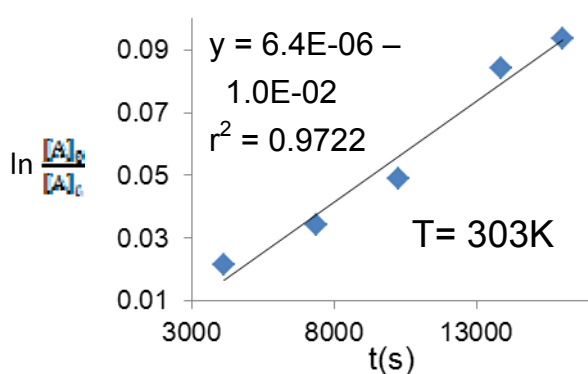

$k = (6.4 \pm 1.5) \times 10^{-6} (s^{-1}), \Delta G^\ddagger = 24.9 \pm 0.1 (kcal mol^{-1})$

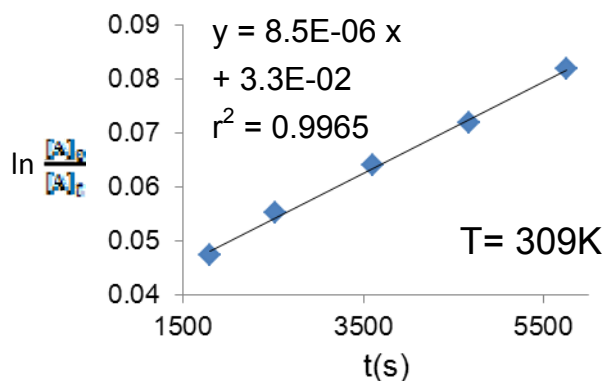

$k = (8.5 \pm 0.7) \times 10^{-6} (s^{-1}), \Delta G^\ddagger = 25.3 \pm 0.1 (kcal mol^{-1})$

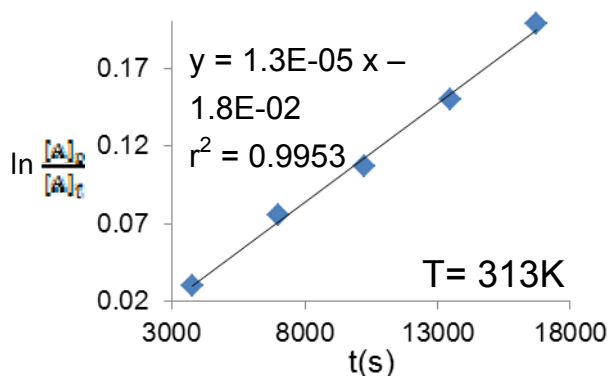

$k = (1.3 \pm 0.2) \times 10^{-5} (s^{-1}), \Delta G^\ddagger = 25.3 \pm 0.1 (kcal mol^{-1})$

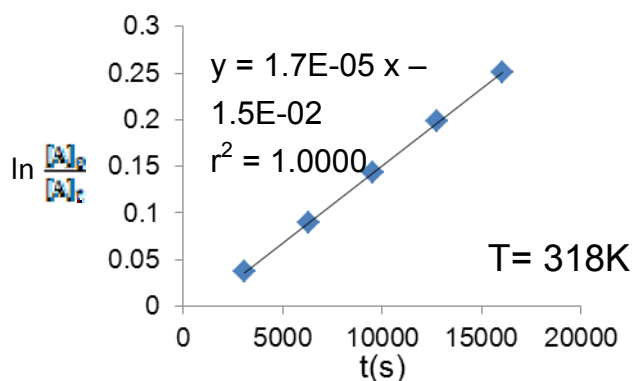

$k = (1.7 \pm 0.1) \times 10^{-5} (s^{-1}), \Delta G^\ddagger = 25.6 \pm 0.1 (kcal mol^{-1})$

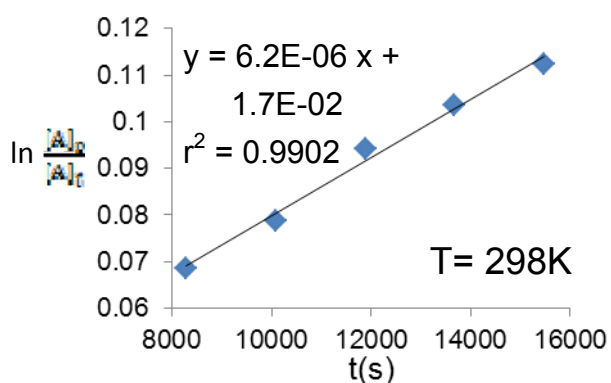

$k = (6.2 \pm 0.9) \times 10^{-6} (s^{-1}), \Delta G^\ddagger = 24.5 \pm 0.1 (kcal mol^{-1})$

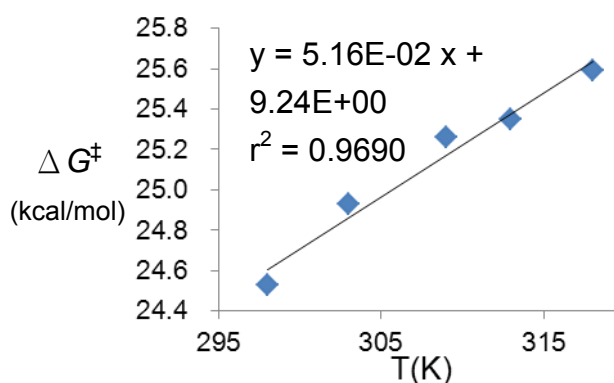

$\Delta H^\ddagger = \text{intercept} = 9.2 \pm 3.9 (kcal mol^{-1}),$   
 $\Delta S^\ddagger = -\text{slope} = -51.6 \pm 12.6 (cal mol^{-1} K^{-1})$

X = H and [1 $\rightarrow$ 6-H<sub>2</sub>][2PF<sub>6</sub>] was the product formed.

In these experiments, [A<sub>t</sub>] and [P<sub>t</sub>] were determined by integration of the signals at δ 7.79 (d, J = 7 Hz, 2H) and δ 7.96 (d, J = 7 Hz, 4H), respectively.

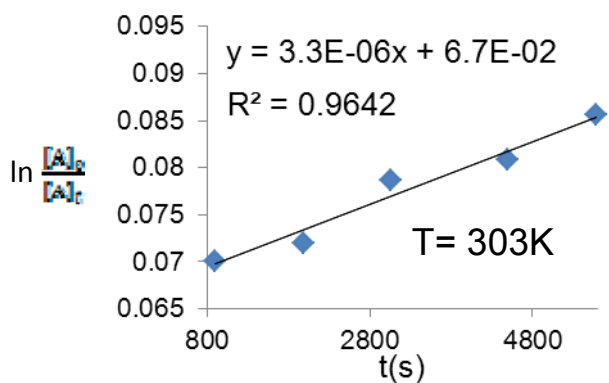

$k = (3.3 \pm 0.9) \times 10^{-6} \text{ (s}^{-1}\text{)}, \Delta G^\ddagger = 25.3 \pm 0.1 \text{ (kcal mol}^{-1}\text{)}$

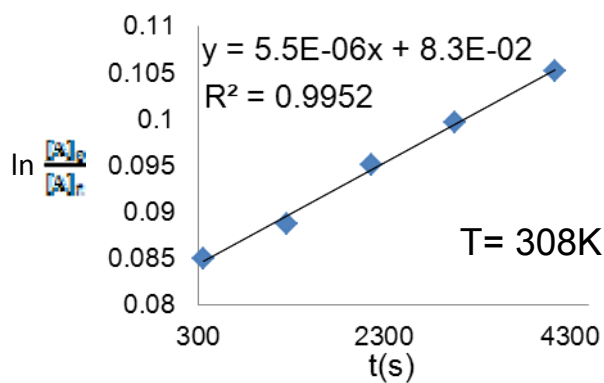

$k = (5.5 \pm 0.6) \times 10^{-6} \text{ (s}^{-1}\text{)}, \Delta G^\ddagger = 25.4 \pm 0.1 \text{ (kcal mol}^{-1}\text{)}$

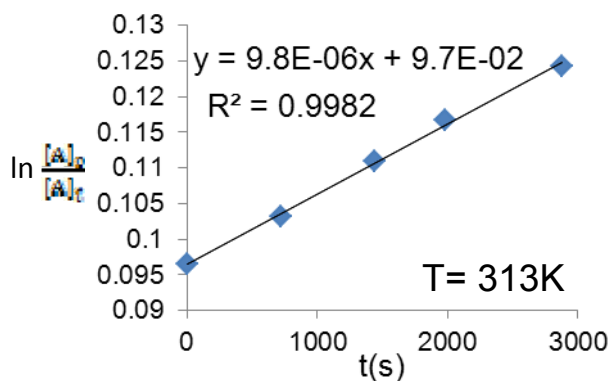

$k = (9.8 \pm 0.6) \times 10^{-6} \text{ (s}^{-1}\text{)}, \Delta G^\ddagger = 25.5 \pm 0.1 \text{ (kcal mol}^{-1}\text{)}$

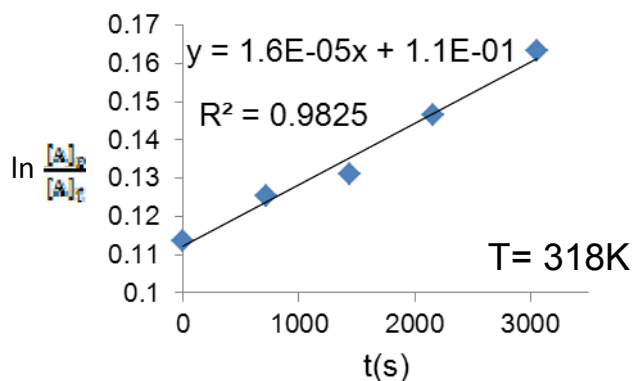

$k = (1.6 \pm 0.3) \times 10^{-5} \text{ (s}^{-1}\text{)}, \Delta G^\ddagger = 25.6 \pm 0.1 \text{ (kcal mol}^{-1}\text{)}$

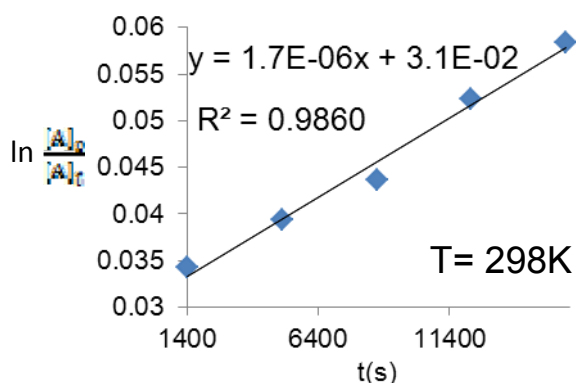

$k = (1.7 \pm 0.3) \times 10^{-6} \text{ (s}^{-1}\text{)}, \Delta G^\ddagger = 25.3 \pm 0.1 \text{ (kcal mol}^{-1}\text{)}$

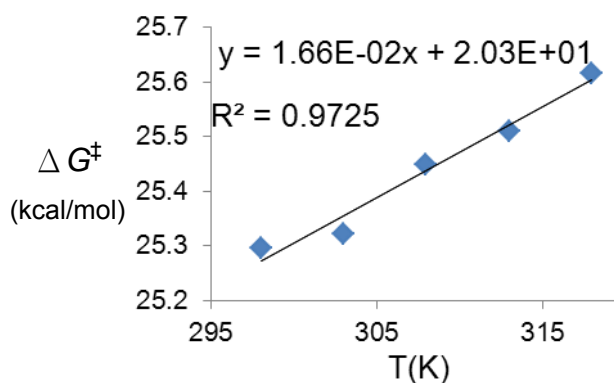

$\Delta H^\ddagger = \text{intercept} = 20.3 \pm 1.2 \text{ (kcal mol}^{-1}\text{)},$   
 $\Delta S^\ddagger = - \text{slope} = - 16.6 \pm 3.8 \text{ (cal mol}^{-1} \text{K}^{-1}\text{)}$
